# Supplementary material for: Longitudinal cohort study of the impact of specialist cancer services for teenagers and young adults on quality of life: outcomes from the BRIGHTLIGHT study
Source: PubMed Central journal article supplement — BMJ Open. 2020 Nov 26;10(11):e038471. doi: 10.1136/bmjopen-2020-038471 (PMC7692812; doi:10.1136/bmjopen-2020-038471), 2020-11-26
Supplement: bmjopen-2020-038471.draft_revisions.pdf [file bmjopen-2020-038471.draft_revisions.pdf]

# BMJ Open

BMJ Open is committed to open peer review. As part of this commitment we make the peer review history of every article we publish publicly available.

When an article is published we post the peer reviewers' comments and the authors' responses online. We also post the versions of the paper that were used during peer review. These are the versions that the peer review comments apply to.

The versions of the paper that follow are the versions that were submitted during the peer review process. They are not the versions of record or the final published versions. They should not be cited or distributed as the published version of this manuscript.

BMJ Open is an open access journal and the full, final, typeset and author-corrected version of record of the manuscript is available on our site with no access controls, subscription charges or pay-per-view fees (<http://bmjopen.bmj.com>).

If you have any questions on BMJ Open's open peer review process please email [info.bmjopen@bmj.com](mailto:info.bmjopen@bmj.com)

# BMJ Open

## Longitudinal cohort study of the impact of specialist cancer services for teenagers and young adults on quality of life: outcomes from the BRIGHTLIGHT study

|                               |                                                                                                                                                                                                                                                                                                                                                                                                                                                                                                                                                                                                                                                                                                                                                                                                                                                                                                                                                                                                                                                                                                                                                                       |
|-------------------------------|-----------------------------------------------------------------------------------------------------------------------------------------------------------------------------------------------------------------------------------------------------------------------------------------------------------------------------------------------------------------------------------------------------------------------------------------------------------------------------------------------------------------------------------------------------------------------------------------------------------------------------------------------------------------------------------------------------------------------------------------------------------------------------------------------------------------------------------------------------------------------------------------------------------------------------------------------------------------------------------------------------------------------------------------------------------------------------------------------------------------------------------------------------------------------|
| Journal:                      | <i>BMJ Open</i>                                                                                                                                                                                                                                                                                                                                                                                                                                                                                                                                                                                                                                                                                                                                                                                                                                                                                                                                                                                                                                                                                                                                                       |
| Manuscript ID                 | bmjopen-2020-038471                                                                                                                                                                                                                                                                                                                                                                                                                                                                                                                                                                                                                                                                                                                                                                                                                                                                                                                                                                                                                                                                                                                                                   |
| Article Type:                 | Original research                                                                                                                                                                                                                                                                                                                                                                                                                                                                                                                                                                                                                                                                                                                                                                                                                                                                                                                                                                                                                                                                                                                                                     |
| Date Submitted by the Author: | 11-Mar-2020                                                                                                                                                                                                                                                                                                                                                                                                                                                                                                                                                                                                                                                                                                                                                                                                                                                                                                                                                                                                                                                                                                                                                           |
| Complete List of Authors:     | Taylor, Rachel; University College London Hospitals NHS Foundation Trust, CNMAR<br>Fern, Lorna; University College London Hospitals NHS Foundation Trust, Oncology<br>Barber, Julie; University College London, Department of Statistical Science<br>Alvarez-Galvez, Javier; University of Cadiz, Department of Biomedicine, Biotechnology and Public Health<br>Feltbower, Richard; University of Leeds,<br>Lea, Sarah; University College London Hospitals NHS Foundation Trust<br>Martins, Ana; University College London Hospitals NHS Foundation Trust<br>Morris, Stephen; University of Cambridge School of Clinical Medicine, Primary Care Unit<br>Hooker, Louise; University Hospital Southampton NHS Foundation Trust, Wessex Teenage and Young Adult Cancer Service,<br>Gibson, Faith; University of Surrey, Faculty of Health and Medical Sciences; Great Ormond Street Hospital For Children NHS Foundation Trust,<br>Raine, Rosalind; University College London, Institute of Epidemiology & Health<br>Stark, Dan; University of Leeds, Leeds Insitute of Molecular Medicine<br>Whelan, Jeremy; University College London Hospitals NHS Foundation Trust, |
| Keywords:                     | Organisation of health services < HEALTH SERVICES ADMINISTRATION & MANAGEMENT, ONCOLOGY, Quality in health care < HEALTH SERVICES ADMINISTRATION & MANAGEMENT                                                                                                                                                                                                                                                                                                                                                                                                                                                                                                                                                                                                                                                                                                                                                                                                                                                                                                                                                                                                         |
|                               |                                                                                                                                                                                                                                                                                                                                                                                                                                                                                                                                                                                                                                                                                                                                                                                                                                                                                                                                                                                                                                                                                                                                                                       |

SCHOLARONE™  
Manuscripts

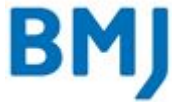

I, the Submitting Author has the right to grant and does grant on behalf of all authors of the Work (as defined in the below author licence), an exclusive licence and/or a non-exclusive licence for contributions from authors who are: i) UK Crown employees; ii) where BMJ has agreed a CC-BY licence shall apply, and/or iii) in accordance with the terms applicable for US Federal Government officers or employees acting as part of their official duties; on a worldwide, perpetual, irrevocable, royalty-free basis to BMJ Publishing Group Ltd ("BMJ") its licensees and where the relevant Journal is co-owned by BMJ to the co-owners of the Journal, to publish the Work in this journal and any other BMJ products and to exploit all rights, as set out in our [licence](#).

The Submitting Author accepts and understands that any supply made under these terms is made by BMJ to the Submitting Author unless you are acting as an employee on behalf of your employer or a postgraduate student of an affiliated institution which is paying any applicable article publishing charge ("APC") for Open Access articles. Where the Submitting Author wishes to make the Work available on an Open Access basis (and intends to pay the relevant APC), the terms of reuse of such Open Access shall be governed by a Creative Commons licence – details of these licences and which [Creative Commons](#) licence will apply to this Work are set out in our licence referred to above.

Other than as permitted in any relevant BMJ Author's Self Archiving Policies, I confirm this Work has not been accepted for publication elsewhere, is not being considered for publication elsewhere and does not duplicate material already published. I confirm all authors consent to publication of this Work and authorise the granting of this licence.

Final version

1  
2  
3 Longitudinal cohort study of the impact of specialist cancer services for teenagers and young  
4 adults on quality of life: outcomes from the BRIGHTLIGHT study  
5  
6  
7

8 Rachel M Taylor PhD, Lorna A Fern PhD, Julie A Barber PhD, Javier Alvarez-Galvez PhD,  
9 Richard G Feltbower PhD, Sarah Lea PhD, Ana Martins PhD, Stephen Morris PhD, Louise  
10 Hooker MSc, Faith Gibson PhD, Rosalind Raine PhD, Dan P Stark MD, Jeremy S Whelan  
11 MD  
12  
13

14  
15 Rachel Taylor, Director of the CNMAR, Centre for Nurse, Midwife and AHP Led Research  
16 (CNMAR), University College London Hospitals NHS Foundation Trust, London NW1 2PG  
17  
18

19 Lorna Fern, Researcher, Cancer Division, University College London Hospitals NHS  
20 Foundation Trust, London NW1 2PG  
21  
22

23 Julie Barber, Associate Professor in Medical Statistics, Department of Statistical Science,  
24 University College, London WC1E 6BT  
25

26 Javier Alvarez-Galvez, Research Fellow, Department of Biomedicine, Biotechnology and  
27 Public Health, University of Cadiz, Avda. Ana de Viya, 52, 11009 Cádiz, Spain  
28  
29

30 Richard Feltbower, Senior Lecturer in Epidemiology, School of Medicine, University of  
31 Leeds, Leeds, LS2 9JT.  
32

33 Sarah Lea, Research Facilitator, Cancer Division, University College London Hospitals NHS  
34 Foundation Trust, London NW1 2PG  
35  
36

37 Ana Martins, Research Associate, Cancer Division, University College London Hospitals  
38 NHS Foundation Trust, London NW1 2PG  
39  
40

41 Steve Morris, Professor of Health Economics, Primary Care Unit, Department of Public  
42 Health and Primary Care, University of Cambridge, United Kingdom  
43  
44

45 Louise Hooker, teenage Cancer Trust Lead Nurse, Wessex Teenage and Young Adult  
46 Cancer Service, University Hospital Southampton, Southampton, SO16 5YA  
47

48 Faith Gibson, Professor of Child Health and Cancer Care, School of Health Sciences,  
49 Faculty of Health and Medical Sciences, University of Surrey, Guildford, Surrey GU2 7XH  
50 and Centre for Outcomes and Experience Research in Children's Health, Illness and  
51 Disability (ORCHID), Great Ormond Street Hospital for Children NHS Foundation Trust,  
52 London WCIN3JH  
53  
54

55 Rosalind Raine, Professor of Health Services research, Department of Applied Health  
56 Research, Director, NIHR CLAHRC North Thames, NIHR Senior Investigator, University  
57 College London, London WC1E 7HB  
58  
59  
60

Final version

1  
2  
3 Dan Stark, Professor of Teenage and Young Adult Cancer Research and Consultant  
4 Medical Oncologist, Leeds Institute of Medical Research at St James's, Leeds LS9 7TF  
5

6  
7 Jeremy Whelan, Professor of Cancer Medicine, Cancer Division, University College London  
8 Hospitals NHS Foundation Trust, London NW1 2PG  
9

10 Correspondence: Dr Lorna Fern, lorna.fern@nhs.net  
11

12  
13 Keywords: BRIGHTLIGHT, teenagers and young adults, cancer, observational research,  
14 cohort, outcome, quality of life, experience  
15

16 Abstract = 287/300

17 Word count = 3,542

18 Number of Tables = 4

19 Number of Figures = 4  
20  
21  
22

## 23 ABSTRACT

24  
25  
26 *Objectives:* In England, healthcare policy supports specialised age-appropriate services for  
27 teenagers and young adults (TYA), broadly those aged 13-24 years at diagnosis. Specialist  
28 Principal Treatment Centres (PTC) provide enhanced age-specific care for TYA, although  
29 many still receive their care in adult or children's cancer services. We present the first  
30 prospective structured analysis of quality of life (QOL) associated with the amount of care  
31 received in a TYA-PTC  
32  
33

34  
35 *Design:* Longitudinal cohort study  
36

37 *Setting:* Hospitals delivering in-patient cancer care in England  
38

39 *Participants:* 1,114 young people aged 13-24 years newly diagnosed with cancer  
40  
41

42 *Intervention:* Exposure to the TYA-PTC defined as patients receiving NO-TYA-PTC care with  
43 those receiving ALL-TYA-PTC and SOME-TYA-PTC care.  
44

45 *Primary outcome:* quality of life measured at five time points: 6,12,18, 24 and 36-months  
46 after diagnosis  
47  
48

49 *Results:* Group mean total QOL improved over time for all patients, but for those receiving  
50 NO-TYA-PTC was an average of 5.6 points higher (95% CI 2.8-8.5) than in young people  
51 receiving SOME-TYA-PTC care, and 4.2 points higher (95% CI 1.1-7.3) compared to ALL-  
52 TYA-PTC care. Differences were greatest 6 months after diagnosis, reduced over time, and  
53 did not meet the 8-point level that is proposed to be clinically significant. Young people  
54 receiving NO-TYA-PTC care were more likely to have been offered a choice of place of care,  
55 be older, from more deprived areas, in work, and have less severe disease. However,  
56 analyses adjusting for confounding factors did not explain the differences between TYA  
57 groups.  
58  
59  
60

Final version

1  
2  
3 *Conclusions:* Receipt of some or all care in a TYA-PTC was associated with poorer QOL  
4 soon after cancer diagnosis, but a more rapid improvement in QOL 3-years after diagnosis.  
5 However, these changes were small and may not be clinically significant. Receipt of some  
6 care in a TYA-PTC requires further study.  
7  
8  
9

### 10 **Strengths & limitations of this study**

- 11 • We present the first national evaluation of a model of care which aims to improve  
12 outcomes for teenagers and young adults with cancer.
- 13 • We were able to quantify where young people received care through nationally  
14 collated hospital activity data so we could objectively assign young people to a group  
15 representing the model of care received.
- 16 • Analysis of longitudinal data for three years after diagnosis was adjusted for multiple  
17 confounding variables, identified from a conceptual model of patient experience,  
18 which underpinned data collection in the study.
- 19 • The measure quantifying where care was received assumed that all teenage and  
20 young adult Principal Treatment Centres provided equivalent facilities and care.
- 21 • The cohort comprises 20% of the total young people diagnosed with cancer in  
22 England during the time period, which could impact on the generalisability of the  
23 results.  
24  
25  
26  
27  
28  
29

## 30 **INTRODUCTION**

31  
32  
33 Cancer in teenagers and young adults (TYA) is rare, though accounts for an estimated  
34 350,000 new diagnoses globally in young people aged 15-29 and a reported rising incidence  
35 rate[1]. Lower survival rates compared to younger children have fuelled many international  
36 initiatives aimed to improve outcomes and wellbeing. In particular, the need for specialist  
37 age-appropriate care and environments are hailed as a critical component of good cancer  
38 care for TYA. However, the effect on clinical outcomes that care in such environments may  
39 result in are yet to be described.  
40  
41

42  
43 Distinct cancer service provision for TYA began in the United Kingdom (UK) in the 1990s [2].  
44 This was initiated by clinician and patient advocacy, promoting principles which responded to  
45 young people's reports of care that frequently lacked support for their priorities of progress  
46 towards normal life goals and care alongside others of a similar age delivered by  
47 professionals who understood young people [3]. Specialised UK National Health Services  
48 (NHS) for young people with cancer have been mandated in England since 2005 by National  
49 Institute for Health and Clinical Excellence (NICE) guidance [4]. The guidance identified that  
50 young people's needs may be poorly met in children's and older adult services working in  
51 isolation from each other [5], and that TYA-specific places of treatment and care may be key  
52 to achieving better outcomes for young people with cancer [6] due in part to the distinct  
53 impact of cancer on young people's wellbeing, such as in the physical, psychosocial and  
54 developmental domains [7].  
55  
56  
57

58  
59 The model of specialised TYA cancer care implemented from 2005 focused on 13 TYA  
60 Principal Treatment Centres (TYA-PTC) in England, which had funding to develop specialist

Final version

1  
2  
3 care, including age-appropriate environments and multi-disciplinary teams working with TYA.  
4 The guidance directed that those under 19 years were treated in a TYA-PTC. The model for  
5 young adults aged 19-24 years was to offer choice to receive care in a TYA-PTC or a local  
6 cancer unit if it were designated as able to provide their cancer treatment and at least some  
7 aspects of age-appropriate care. By 2010, about two-thirds of those aged 15-18 years and  
8 one-third of 19-24-year olds were believed to have contact with a TYA-PTC [8]. While there  
9 is an international mobilisation to implement specialist TYA services [3], including in other  
10 European countries, Australasia and North America, the impact of such services on clinical  
11 outcomes has not been robustly evaluated.  
12  
13  
14

15 The BRIGHTLIGHT study is a prospective evaluation of the benefits of specialist TYA  
16 services in the English NHS. In order to capture the complexity of the delivery of TYA cancer  
17 care, it comprised an evaluation from the perspective of the environment of care [9], the  
18 workforce delivering care [10] and young people receiving care. BRIGHTLIGHT was  
19 developed with extensive input from young people as well as health professionals [6, 11, 12]  
20 and based on consultation with young people [13]. This included input into the selection of  
21 the primary outcome: quality of life (QOL).  
22  
23  
24

25 Quality of Life is defined as "...subjective, multidimensional and dynamic. It is unique to each  
26 individual and includes aspects of physical, psychological and social function. It is dependent  
27 not only upon the stage of development but also the illness trajectory. This involves the  
28 achievement of goals and aspirations and the constraints imposed through ill health and  
29 treatment" [14]. Measurement of QOL uses the patient's own report to evaluate the spectrum  
30 of impact of illness upon them and has become an increasingly valued healthcare outcome.  
31 Previous reports of young people's QOL after a cancer diagnosis have shown this to be  
32 significantly lower than normative population data [15]. Longitudinal assessment has  
33 indicated QOL improved in the first year after diagnosis but there was no significant  
34 improvement in the second year [16]. No evaluation beyond the second year has been  
35 reported and while studies have investigated predictors of QOL there has been no  
36 evaluation of the impact of different models of delivery of care on QOL. We examined QOL  
37 at 6, 12, 18, 24 and 36 months after diagnosis in relation to the proportion of care young  
38 people received in a TYA-PTC  
39  
40  
41  
42

## 43 METHODS

### 44 Study design

45 The BRIGHTLIGHT study is a mixed methods programme of research. Results from an  
46 embedded longitudinal cohort study, obtaining data from young people through a bespoke  
47 survey [17], are reported here. The survey was administered at five time points during the  
48 first three years after diagnosis (6, 12, 18, 24 and 36 months, waves 1-5 respectively). A  
49 scale was developed, previously described in detail [18], using Hospital Episode Statistics  
50 (HES) in-patient data to measure episodes of care in different NHS Trusts and then used to  
51 assign young people to one of three levels of TYA care dependent on how much in-patient  
52 HES activity recorded in the first 12 months after diagnosis was delivered in a TYA-PTC: no  
53 care in a TYA-PTC (NO-TYA-PTC), some care delivered in a TYA-PTC with additional care  
54 in a children's or adult cancer unit (SOME-TYA-PTC) or all care delivered in a TYA-PTC  
55 (ALL-TYA-PTC).  
56  
57  
58  
59  
60

Final version

### Participants and setting

BRIGHTLIGHT was open to recruitment between October 2012 and April 2015 in 109 English NHS hospitals of which 97 recruited at least one young person. Eligibility was defined as aged 13-24 years at the time of diagnosis, newly diagnosed with cancer (ICD-10 codes C00-C97) and recruited within four months of diagnosis. There was no eligibility exclusion for a language or sensory impairment affecting communication. The following groups were excluded: those serving a custodial sentence; not anticipated to be alive at the first point of data collection (6-months after diagnosis); or incapable of completing a survey. Details of the recruitment process are reported elsewhere [18, 19]. Young people gave written consent and parental consent was also obtained for those less than 16 years. Checks were made through the Demographic Batch Service at NHS digital before each wave of data collection to ensure young people were alive and to obtain their most recent address. The study was approved by London-Bloomsbury NHS Research Ethics Committee and the Confidentiality Advisory Group of the Health Research Authority.

The sample size calculation was based on a comparison between the three levels of TYA care [18] for the primary outcome of PedsQL total score [20], measured at five time points over the three-year follow-up. Previously reported PedsQL data for childhood cancer patients suggested a standard deviation for this score of 16 [21]. To detect a difference in scores of 8 units with 80% power [22] required a sample of 200 young people. This calculation assumed a significance level of 0.01 (2 sided) to allow for multiple comparisons between three levels of TYA care and assumed an average of three repeated measurements per patient (intra cluster correlation 0.3 as suggested as a maximum for similar patient outcomes [23]). The calculation allowed for adjustment for confounding factors using a variance inflation factor with a correlation of 0.5 [24]. To ensure adequate power to examine the effect of TYA care on QOL within subgroups of age at diagnosis (13-18 and 19-24 years) and type of tumour (haematological, solid tumour groups), the minimum required sample size was raised to 800 (80% power).

### Data collection

Data were collected from three sources: young people's self-report, patient clinical records, and NHS and Public Health England (PHE) databases. Details of these data sources are reported elsewhere [18]. Data presented here are responses to the BRIGHTLIGHT Survey, a bespoke survey containing five validated questionnaires and 169 descriptive questions related to post diagnosis experience. The survey was administered through face-to-face interviews in young people's homes by an independent research company at the first time point and either online or telephone interview at subsequent waves of data collection [17].

This paper reports data for the primary outcome, QOL, which was measured using the Pediatric Quality of Life Questionnaire (PedsQL) [20]. At the time of study development this was the only measure of QOL validated for teenagers and young adults [25]. It contains 23 items rated using a five-point Likert Scale (Never, Almost never, Sometimes, Often, Almost always). Responses are presented as four domain scores (physical, emotional, social, and work/studies functioning), two summary scores (physical and psychosocial function) and a total score. Domain, summary and total scores range from 0-100, with 100 representing the best possible QOL.

### Analysis



Final version

1  
2  
3 Analysis was carried out following a predefined statistical analysis plan using STATA version  
4 15. A mixed effects model was used to investigate the relationship between the levels of  
5 TYA care and the PedsQL total score, allowing for repeated measurements taken over the 3  
6 years since diagnosis. The model was adjusted for confounding factors identified based on  
7 the conceptual model underpinning the BRIGHTLIGHT Survey [11, 17] and using a causal  
8 diagram in the form of a Directed Acyclic Graph (DAG) (DAGitty software [www.dagitty.net](http://www.dagitty.net);  
9 Supplemental File, Figure A1). Factors adjusted for were age at diagnosis, type of cancer  
10 (leukaemia, lymphoma, brain and central nervous system, bone tumours, sarcoma, germ  
11 cell, melanoma, carcinomas, other), socioeconomic status (Index of Multiple Deprivation  
12 (IMD) [26] quintile), severity of cancer (least, intermediate, most [18]), ethnicity (white, other),  
13 choice offered about where to receive treatment (yes/no), presence of any long term  
14 condition prior to cancer (yes/no), days from first symptom to diagnosis and number of  
15 General Practitioner visits before diagnosis. Geographical location (specified as 12 cities,  
16 derived from the TYA-PTC and their network of hospitals) was included in the model as a  
17 random effect. Models were extended to include interaction terms to investigate predefined  
18 subgroup effects by age at diagnosis (both as a continuous factor and using categories of  
19 13-18 and 19-24 years) and tumour type (haematological and solid tumours). An interaction  
20 with time since diagnosis was also examined to investigate whether the relationship between  
21 level of TYA care and QOL changed over time. Similar models were fitted for the PedsQL  
22 domain scores for physical, social, emotional and work/school/college functioning, and the  
23 psychosocial summary score.  
24  
25  
26  
27  
28  
29

30 The extent and patterns of missing QOL data over time was examined using summary  
31 statistics and profile plots. As there is no provision in the scoring of PedsQL to directly  
32 account for death, our main analysis did not distinguish between data 'missing' following  
33 death and that missing for other reasons. With the possibility of informative missing data due  
34 to deaths, a sensitivity analysis was carried where joint mixed-effect models for the  
35 longitudinal QOL scores and time until death were fitted to account for the correlation  
36 between the QOL and survival outcomes [27]. The QOL estimates for the effect of level of  
37 TYA care were then compared with those obtained from previously fitted mixed models.  
38  
39

## 40 RESULTS

41  
42  
43 A total of 1,126 young people were recruited. BRIGHTLIGHT survey data at wave 1 were  
44 available for 830 (75%) participants and details of numbers at each wave are summarised in  
45 Figure 1. Characteristics of those who did and did not complete wave 1 were similar, except  
46 for a higher proportion of non-white participants not completing wave 1 (12% vs. 19%,  
47  $p=.004$ ) [18]. Forty-eight participants could not be assigned a level of TYA-PTC care as  
48 there were no linked HES in-patient records available. Data from 782 young people were  
49 therefore included. There were fewer young people receiving ALL-TYA-PTC care ( $n=193$ ;  
50 25%) in comparison to SOME-TYA-PTC ( $n=312$ ; 40%) and NO-TYA-PTC ( $n=277$ ; 35%).  
51 Demographic characteristics and summary of variables adjusted for in the analysis are  
52 shown in Table 1. Young people who received NO-TYA-PTC care were slightly older, more  
53 likely to be working full/part time, had less severe disease, had a better prognosis and were  
54 more likely to have been given a choice in their place of care. Young people who had ALL-  
55 TYA-PTC care were more likely to come from less deprived areas.  
56  
57  
58  
59  
60

Final version

Table 1: Participant characteristics according to level of care at wave 1

| Characteristic                             |                                                                                                                                           | Level of TYA care at 12 months from diagnosis                      |                                                                    |                                                                  |
|--------------------------------------------|-------------------------------------------------------------------------------------------------------------------------------------------|--------------------------------------------------------------------|--------------------------------------------------------------------|------------------------------------------------------------------|
|                                            |                                                                                                                                           | NO-TYA-PTC<br>N=277                                                | SOME-TYA-PTC<br>N=312                                              | ALL-TYA-PTC<br>N=193                                             |
| <b>Age at diagnosis (years)</b>            | Mean (SD)                                                                                                                                 | 21.04 (3.01)                                                       | 19.40 (3.41)                                                       | 19.97 (3.15)                                                     |
| <b>Gender</b>                              | Male<br>Female                                                                                                                            | 148 (53%)<br>129 (47%)                                             | 165 (53%)<br>147 (47%)                                             | 112 (58%)<br>81 (42%)                                            |
| <b>Ethnicity*</b>                          | White<br>Mixed<br>Asian<br>Black<br>Other                                                                                                 | 252 (91%)<br>4 (1%)<br>15 (5%)<br>4 (1%)<br>2 (1%)                 | 273 (88%)<br>5 (2%)<br>24 (8%)<br>7 (2%)<br>3 (1%)                 | 163 (84%)<br>4 (2%)<br>20 (10%)<br>2 (1%)<br>4 (2%)              |
| <b>Socioeconomic status (IMD quintile)</b> | 1 – most deprived<br>2<br>3<br>4<br>5 – least deprived                                                                                    | 66 (24%)<br>47 (17%)<br>51 (19%)<br>65 (24%)<br>46 (17%)           | 73 (24%)<br>52 (17%)<br>60 (20%)<br>61 (20%)<br>59 (19%)           | 34 (18%)<br>32 (17%)<br>37 (20%)<br>40 (21%)<br>46 (24%)         |
| <b>Marital Status</b>                      | Married/civil partnership<br>Cohabiting<br>Single/divorced                                                                                | 9 (4%)<br>43 (17%)<br>198 (79%)                                    | 8 (3%)<br>27 (10%)<br>227 (87%)                                    | 6 (3%)<br>18 (10%)<br>148 (86%)                                  |
| <b>Current status</b>                      | Working full/part time<br>In education<br>Other work<br>(apprentice/intern/voluntary)<br>Unemployed<br>Long term sick<br>Not seeking work | 126 (45%)<br>61 (22%)<br>6 (2%)<br>10 (4%)<br>39 (14%)<br>35 (13%) | 72 (23%)<br>112 (36%)<br>5 (2%)<br>11 (4%)<br>51 (16%)<br>61 (20%) | 43 (22%)<br>81 (42%)<br>6 (3%)<br>7 (4%)<br>31 (16%)<br>25 (13%) |

Final version

|                                                |                           |                |                |               |
|------------------------------------------------|---------------------------|----------------|----------------|---------------|
| <b>Type of cancer (Birch classification)</b>   | Leukaemia                 | 19 (7%)        | 49 (16%)       | 33 (17%)      |
|                                                | Lymphoma                  | 111 (40%)      | 75 (24%)       | 70 (36%)      |
|                                                | CNS                       | 9 (3%)         | 9 (3%)         | 12 (6%)       |
|                                                | Bone                      | 7 (3%)         | 59 (19%)       | 3 (2%)        |
|                                                | Sarcomas                  | 8 (3%)         | 31 (10%)       | 15 (8%)       |
|                                                | Germ cell                 | 64 (19%)       | 55 (18%)       | 31 (16%)      |
|                                                | Skin                      | 22 (8%)        | 1 (<1%)        | 4 (2%)        |
|                                                | Carcinomas (not skin)     | 41 (15%)       | 31 (10%)       | 23 (12%)      |
|                                                | Miscellaneous specified** | 5 (2%)         | 2 (<1%)        | 1 (<1%)       |
|                                                | Unspecified Malignant     | 1 (<1%)        | 0              | 1 (<1%)       |
| <b>Severity at diagnosis (row %, column %)</b> | Least                     | 200 (46%, 72%) | 133 (31%, 43%) | 95 (22%, 49%) |
|                                                | Intermediate              | 49 (26%, 18%)  | 82 (44%, 26%)  | 56 (30%, 29%) |
|                                                | Most                      | 28 (17%, 10%)  | 97 (58%, 31%)  | 42 (25%, 22%) |
| <b>Prognostic score</b>                        | <50%                      | 21 (8%)        | 60 (19%)       | 41 (21%)      |
|                                                | 50-80%                    | 54 (20%)       | 125 (40%)      | 44 (23%)      |
|                                                | >80%                      | 200 (73%)      | 126 (41%)      | 108 (56%)     |
| <b>Location***</b>                             | Birmingham                | 41 (15%)       | 59 (19%)       | 12 (6%)       |
|                                                | Bristol                   | 51 (18%)       | 32 (10%)       | 4 (2%)        |
|                                                | Cambridge                 | 12 (4%)        | 8 (3%)         | 1 (1%)        |
|                                                | Manchester                | 22 (8%)        | 35 (11%)       | 11 (6%)       |
|                                                | Merseyside                | 13 (5%)        | 11 (4%)        | 6 (3%)        |
|                                                | East Midlands             | 15 (5%)        | 24 (8%)        | 60 (31%)      |
|                                                | Leeds                     | 20 (7%)        | 25 (8%)        | 25 (13%)      |
|                                                | Newcastle                 | 13 (5%)        | 6 (2%)         | 24 (12%)      |
|                                                | Oxford                    | 5 (2%)         | 4 (1%)         | 7 (4%)        |
|                                                | London                    | 60 (22%)       | 83 (27%)       | 10 (5%)       |
|                                                | Sheffield                 | 7 (3%)         | 9 (3%)         | 9 (5%)        |
|                                                | Southampton               | 18 (7%)        | 16 (5%)        | 24 (12%)      |

Final version

|                                                                    |                           |                                          |                                           |                                            |
|--------------------------------------------------------------------|---------------------------|------------------------------------------|-------------------------------------------|--------------------------------------------|
| <b>Given a choice about where to receive treatment<sup>§</sup></b> | Yes<br>No (or < 19 years) | N=272<br>121 (45%)<br>151 (56%)          | N=311<br>86 (28%)<br>225 (72%)            | N=192<br>48 (25%)<br>144 (75%)             |
| <b>Long term condition prior to cancer</b>                         | Yes<br>No                 | N=277<br>20 (7%)<br>257 (93%)            | N=311<br>34 (11%)<br>277 (89%)            | N=193<br>18 (9%)<br>175 (91%)              |
| <b>Time to diagnosis: days from 1<sup>st</sup> symptom</b>         | Median (IQR), [min, max]  | N=264<br>62 (29.5 to 168.5)<br>[0, 1340] | N=304<br>65.5 (29.5 to 152.5)<br>[0, 959] | N=188<br>63.5 (25.5 to 151.0)<br>[0, 1217] |
| <b>Time to diagnosis: number of GP visits before diagnosis</b>     | Median (IQR), [min, max]  | N=274<br>1 (0 to 3)<br>[0, 20]           | N=311<br>1 (0 to 3)<br>[0, 20]            | N=193<br>2 (1 to 3)<br>[0, 40]             |

\* Wave 1 data was used with missing values completed using available PHE data.

\*\* includes 4 'unclassified' – treated in cancer unit but did not have cancer

\*\*\*Includes the TYA-PTC and hospitals linked to the multi-disciplinary team at the TYA-PTC; where available based on hospital of diagnosis, for 77 cases based on recruiting hospital

§ Those <19 years at diagnosis were assumed not to have been given a choice

Final version

Longitudinal changes in the average QOL total score according to the level of care are shown in Figure 2 (summary by wave is given in Supplemental file, Table A1). Across all time periods this illustrates lower QOL score for those in the SOME and ALL-TYA-PTC groups compared to the NO-TYA-PTC group. Differences between level of care appeared to diminish steadily over time. The negative coefficients for levels of care from the model indicate that across the 3 year period of the study QOL scores were on average higher for those with NO-TYA-PTC care compared with SOME-TYA-PTC and ALL-TYA-PTC with a larger difference compared with the SOME-TYA-PTC category (Table 2). The differences were statistically significant but fell inside the threshold of 8 points proposed to be clinically significant [20]. There was no evidence that the relationship between QOL and level of care was different for the combined group of leukaemia/lymphomas compared with other cancers. Also, there was no evidence of a difference by age at diagnosis (Figure 3). There was evidence that the QOL/Level of care relationship changed over time such that differences between the groups diminished i.e. slopes for SOME-TYA-PTC and ALL-TYA-PTC over time are steeper than for NO-TYA-PTC, therefore rates of improvement of QOL were superior in the ALL-TYA-PTC and SOME-TYA-PTC (Table 3), mirroring what was seen in Figure 2. Analysis of the physical functioning and work/school/college functioning domain scores showed a similar pattern to that seen for the total QOL score. For the emotional functioning domain however, difference between groups were less marked and notably the average difference in scores between the SOME-TYA-PTC and NO-TYA-PTC was reduced. Difference between groups in terms of social functioning and the psychosocial summary scores were small and not statistically significant (Figure 4, Table 4).

Table 2: Mixed model investigating the relationship between levels of TYA care received during the first 12 months from diagnosis and quality of life over 3 years (N=733)

|                                         |              | Difference in means | 95% Confidence Interval | P-value** |
|-----------------------------------------|--------------|---------------------|-------------------------|-----------|
| <b>TYA care category (v NO-TYA-PTC)</b> | SOME-TYA-PTC | -5.63               | -8.49 to -2.77          | P=0.0005  |
|                                         | ALL-TYA-PTC  | -4.17               | -7.28 to -1.07          |           |

\* results from a three level model for repeated measurements of QOL over time since diagnosis, with a random effect for geography and adjustment for time since diagnosis, age at diagnosis, type of cancer, socioeconomic status, severity of cancer, ethnicity, choice about where to receive treatment, long-term condition prior to cancer, days from 1<sup>st</sup> symptom to diagnosis, number of GP visits before diagnosis. Missing data for 96 due to missing TYA category and missing data in other covariates

\*\* Likelihood ratio test

Table 3: Investigation of changes in QOL score over time: Results from adjusted\* mixed effects models with interaction term (time months x TYA-PTC category). Coefficients for time describe the linear increase in QOL score per month within each TYA care category (N=733)

| TYA care category   | Coefficient for time (per month) | 95% confidence interval | P-value from interaction |
|---------------------|----------------------------------|-------------------------|--------------------------|
| <b>NO-TYA-PTC</b>   | 0.26                             | 0.18 to 0.34            | 0.004                    |
| <b>SOME-TYA-PTC</b> | 0.45                             | 0.37 to 0.53            |                          |
| <b>ALL-TYA-PTC</b>  | 0.37                             | 0.27 to 0.46            |                          |

\* model with a random effect for city and adjustment for time since diagnosis, age at diagnosis, type of cancer, socioeconomic status, severity of cancer, ethnicity, choice about where to receive treatment, long-term condition prior to cancer, days from 1<sup>st</sup> symptom to diagnosis, number of GP visits before diagnosis.

Final version

Table 4: Results from adjusted mixed effects models investigating the relationship between levels of TYA care received during the first 12 months from diagnosis and the quality of life domain scores

|                                                |              | Difference in means | 95% Confidence Interval | P-value  |
|------------------------------------------------|--------------|---------------------|-------------------------|----------|
| <b>PHYSICAL FUNCTIONING (N=733)</b>            |              |                     |                         |          |
| TYA care category (v NO-TYA-PTC)               | SOME-TYA-PTC | -8.28               | -11.95 to -4.61         | P=0.0001 |
|                                                | ALL-TYA-PTC  | -4.79               | -8.76 to -0.81          |          |
| <b>EMOTIONAL FUNCTIONING (N=733)</b>           |              |                     |                         |          |
| TYA care category (v NO-TYA-PTC)               | SOME-TYA-PTC | -4.29               | -7.79 to -0.80          | P=0.015  |
|                                                | ALL-TYA-PTC  | -5.43               | -9.29 to -1.57          |          |
| <b>SOCIAL FUNCTIONING (N=733)</b>              |              |                     |                         |          |
| TYA care category (v NO-TYA-PTC)               | SOME-TYA-PTC | -2.96               | -5.77 to -0.16          | P=0.099  |
|                                                | ALL-TYA-PTC  | -2.49               | -5.60 to 0.62           |          |
| <b>WORK/SCHOOL/COLLEGE FUNCTIONING (N=595)</b> |              |                     |                         |          |
| TYA care category (v NO-TYA-PTC)               | SOME-TYA-PTC | -6.87               | -10.45 to -3.30         | P=0.0007 |
|                                                | ALL-TYA-PTC  | -4.67               | -8.47 to -0.87          |          |
| <b>PSYCHOSOCIAL SUMMARY SCORE (N=600)</b>      |              |                     |                         |          |
| TYA care category (v NO-TYA-PTC)               | SOME-TYA-PTC | -2.51               | -5.71 to 0.70           | P=0.074  |
|                                                | ALL-TYA-PTC  | -3.96               | -7.44 to -0.48          |          |

\*\* results from a three level model for repeated measurements of QOL domain score over time since diagnosis, with a random effect for city and adjustment for time since diagnosis, age at diagnosis, type of cancer, socioeconomic status, severity of cancer, ethnicity, choice about where to receive treatment, long-term condition prior to cancer, days from 1<sup>st</sup> symptom to diagnosis, number of GP visits before diagnosis.

Results from post hoc analysis excluding patients with bone tumours were similar to those for all cancers combined (Supplemental file, Table A2). A subgroup investigation of patients with lymphoma, the biggest diagnostic category, showed these were not significantly different from those for the group of other cancer types (Supplemental file, Table A3). Finally, sensitivity analyses using joint modelling for survival alongside longitudinal QOL did not alter the conclusion based on the main results (Supplemental file, Table A4).

## DISCUSSION

Our study is the first reported national longitudinal evaluation of specialist cancer services, more specifically TYA-PTCs and their networks of care, as they were originally defined in 2005 [4]. We recorded patient outcomes to determine the influence of place of care, and after consultation with patients and professionals, selected QOL as the primary parameter of interest. Using routinely collected hospital admission data to identify time spent in the TYA-PTC, we categorised patients by the level of their care received in the TYA-PTC (all, none or some). We found that there was a statistically significant difference between these groups with those in the NO-TYA-PTC group having superior QOL compared to those in the ALL-TYA-PTC group, whilst those in the SOME-TYA-PTC group reported lowest QOL. Quality of life improved over time in all three groups, but rates of improvement were significantly better for SOME and ALL-TYA-PTC.

Final version

1  
2  
3 We predicted that sociodemographic or disease factors might explain some of the  
4 differences between groups and adjusted the analyses for these confounding variables.  
5 Despite extensive analysis we were unable to identify other factors to account for these  
6 differences. Like other reports of young people's QOL after a cancer diagnosis [15], we  
7 found this to be low, irrespective of where young people were treated. We found that young  
8 people who did not access a TYA-PTC had better QOL in comparison to those who had all  
9 or some of their care in a TYA-PTC. However, while this was statistically significant, the  
10 mean difference between the NO-TYA-PTC and ALL-TYA-PTC groups was not at a level  
11 proposed as clinically significant (8-point difference [21]). Nevertheless, it is important to  
12 consider reasons for lower QOL when young people experience multiple types of place of  
13 care and the determinants of place of care. Based on work in other settings where care is  
14 delivered on multiple sites [28] we surmise that this may result from limited coordination of  
15 care, perhaps including inadequate communication with and between professionals. Having  
16 to repeat conversations and explanations of their cancer diagnosis and treatment details is  
17 frequently reported as burdensome to young people [11]. A greater understanding of the  
18 determinants of place of care for young people and the factors which influence a sense of  
19 care co-ordination deserve further exploration.  
20  
21  
22  
23  
24

25 It is interesting that young people who had no access to the TYA-PTC rated their QOL the  
26 highest. This could reflect young people rating themselves by comparison with the other  
27 people they could see being treated for cancer outside of a TYA-PTC, including older adults.  
28 It could also be that young people chose to receive care locally rather than travel to the TYA-  
29 PTC so they could keep their links to their 'normal' life, which is supported by the domain  
30 level analysis where they also rated their work/school/college functioning higher. Future work  
31 could focus on the influence of being given a choice in the place where young people  
32 receive care, and the factors that young people consider to be important when making this  
33 decision.  
34  
35  
36

37 The longest follow-up for longitudinal assessment of QOL previously reported to two years  
38 after diagnosis [16], which showed no improvement after the first year. However, we found  
39 that there was a gradual improvement in QOL over 3-years, which was more rapid when  
40 young people received all their care in a TYA-PTC. The philosophy of TYA cancer care  
41 includes the delivery of care to support young people to achieve their long-term personal  
42 outcomes (education, employment and relationships), the benefits of care provided by the  
43 TYA-PTC may therefore not be realised in the short-term. It would be beneficial for us to  
44 understand whether this improvement continued into long-term survivorship, especially the  
45 influence of QOL reaching and sustaining goals such as employment.  
46  
47  
48

49 There are several limitations to this study including how specialist care was defined and  
50 measured. This was based on the location of the 13 NHS Trusts in England commissioned  
51 as TYA-PTCs but not the specific hospitals within these Trusts where the specialist TYA  
52 services were based. For example, a Trust which included multiple hospitals could only have  
53 specialist TYA services in one therefore a young person receiving care in one of the other  
54 hospitals was assumed to have had access to specialist TYA services. Furthermore, using  
55 the Trust commissioned as a TYA-PTC does not capture the details of the TYA-specific care  
56 available or delivered and assumes that this is equal in all. We know there was wide  
57 variation in the delivery of care through the duration of the study [29]. However, at the time of  
58 study inception HES was the sole data source available that would allow an objective  
59  
60

Final version

1  
2  
3 measurement of place of care. In complementary work, the key elements of specialist age-  
4 appropriate care for TYA have been described [9]. This would provide an alternative  
5  
6  
7  
8  
9  
10  
11  
12 measurement of place of care. In complementary work, the key elements of specialist age-  
13 appropriate care for TYA have been described [9]. This would provide an alternative  
14  
15  
16  
17  
18  
19  
20  
21  
22  
23  
24  
25  
26  
27  
28  
29  
30  
31  
32  
33  
34  
35  
36  
37  
38  
39  
40  
41  
42  
43  
44  
45  
46  
47  
48  
49  
50  
51  
52  
53  
54  
55  
56  
57  
58  
59  
60

The cohort represented approximately a fifth of the total cancer population diagnosed between July 2012 and December 2014 as ascertained through the National Cancer Registration and Analysis Service, and there were differences in cancer types between the cohort and those not recruited [18], which could impact on the generalisability of the results. We used a single mode of survey administration at wave 1, and multiple modes at waves 2-5. While this may have introduced a social desirability bias (noted to be more so for telephone interviews than web-based surveys [30]), this was to increase the response rate as work during the feasibility study for BRIGHTLIGHT indicated no one method was acceptable to all young people. Finally, we used a measure of QOL that was validated across the age 13-24 years [25], but this may not reflect the issues that were most relevant to young people with cancer in the UK (having been developed in the US in a non-cancer population). This is supported by comments made in the cognitive interviews undertaken when the survey was being developed; young people did not agree with the wording of the school functioning domain, so this was changed to work/school/college [17]. However, young people who were not in education, employment or training would not be able to answer these questions. Future work is required to develop TYA-specific QOL measures that reflect issues specific to this population.

Despite these limitations this is the first systematic prospective evaluation of specialist services for young people with cancer. We have found that TYA cancer care as commissioned in 2010 resulted in young people's QOL gradually improving 3-years after diagnosis and improving more rapidly from a lower baseline if young people's treatment involved a TYA-PTC. NHS care pathways may result in care in specialist centres for young people with the poorest initial QOL, and local care for those with the least poor initial QOL, risk stratifying the patients appropriately. Young people who receive some care in both a children's or adult cancer unit and at a TYA-PTC also have an improvement in QOL, but the rate of improvement was less and QOL remained lower than for young people treated in a single type of organisation. The factors influencing place of care and the differences in QOL and survival remain unclear. A model of 'joint care', increasing the emphasis and investment in communication between TYA-PTCs and other Trusts designated to deliver elements of TYA cancer care, is currently proposed by the NHS in England. The influence of such changes in care provision should be examined prospectively in future to identify if QOL of young people with cancer is improved wherever care is received.

## REFERENCES

1. Barr RD. Adolescents, young adults, and cancer—the international challenge, *Cancer* 2011;117:2245-9.
2. Whiteson M. The Teenage Cancer Trust-advocating a model for teenage cancer services, *European Journal of Cancer* 2003;39:2688-93.
3. Osborn M, Johnson R, Thompson K, et al. Models of care for adolescent and young adult cancer programs, *Pediatric Blood & Cancer* 2019;66:e27991.
4. National Institute for Health and Care Excellence. Guidance on cancer services: improving outcomes in children and young people with cancer. NICE, London 2005.



Final version

- 1  
2  
3 <https://www.nice.org.uk/guidance/csg7/resources/improving-outcomes-in-children-and-young-people-with-cancer-update-773378893> [Accessed 11/03/2020]
- 4  
5  
6 5. Stark D, Bielack S, Brugieres L, et al. Teenagers and young adults with cancer in  
7 Europe: from national programmes to a European integrated coordinated project.  
8 *European Journal of Cancer Care* 2016;25:419-27.
- 9  
10 6. Taylor RM, Fern L, Millington H, et al. "Your place or mine?" Priorities for a specialist  
11 teenage and young adult (TYA) cancer unit: disparity between TYA and professional  
12 perceptions, *Journal of Adolescent and Young Adult Oncology* 2011;1:145-51.
- 13  
14 7. Smith AW, Bellizzi KM, Keegan THM, et al. Health-related quality of life of adolescent  
15 and young adult patients with cancer in the United States: the adolescent and young  
16 adult Health Outcomes and Patient Experience study, *Journal of Clinical Oncology*  
17 2013;31:2136-46.
- 18  
19 8. O'Hara C, Khan M, McCabe M, et al. Notifications of teenagers and young adults  
20 with cancer to a principal treatment centre 2009-2010. *National Cancer Intelligence*  
21 *Network* 2013 <http://www.ncin.org.uk/view?rid=2124> [Accessed 11/03/2020]
- 22  
23 9. Lea S, Taylor RM, Martins A, et al. Conceptualising age-appropriate care for  
24 teenagers and young adults with cancer: a qualitative mixed methods study,  
25 *Adolescent Health Medicine and Therapeutics* 2018;9:149-66.
- 26  
27 10. Taylor RM, Feltbower RG, Aslam N, et al. Modified international e-Delphi survey to  
28 define healthcare professional competencies for working with teenagers and young  
29 adults with cancer. *BMJ Open* 2016;6:e011361.
- 30  
31 11. Fern L, Taylor RM, Whelan J, et al. 'The art of age appropriate care': using  
32 participatory research to describe young people's experience of cancer, *Cancer*  
33 *Nursing*. 2013;36:E27-38.
- 34  
35 12. Gibson F, Fern L, Whelan J, et al. A scoping exercise of favourable characteristics of  
36 professionals working in teenage and young adult cancer care: 'thinking outside of  
37 the box', *Eur J Cancer Care (Engl)* 2012;21:330-9.
- 38  
39 13. Taylor RM, Whelan JS, Gibson F, et al. Involving young people in BRIGHTLIGHT  
40 from study inception to secondary data analysis: insights from 10 years of user  
41 involvement, *Research Involvement and Engagement* 2018;4:50.
- 42  
43 14. Taylor RM, Gibson F, Franck LS. A concept analysis of health-related quality of life in  
44 young people with chronic illness, *J Clin Nurs* 2008;17:1823-33.
- 45  
46 15. Quinn GP, Goncalves V, Sehovic I, et al. Quality of life in adolescent and young adult  
47 cancer patients: a systematic review of the literature, *Patient Related Outcome*  
48 *Measures* 2015;6:19-51.
- 49  
50 16. Husson O, Zebrack BJ, Block R, et al. Health-Related Quality of Life in Adolescent  
51 and Young Adult Patients With Cancer: A Longitudinal Study. *Journal of Clinical*  
52 *Oncology* 2017;35:652-9.
- 53  
54 17. Taylor RM, Fern LA, Solanki A, et al. Development and validation of the  
55 BRIGHTLIGHT Survey, a patient-reported experience measure for young people with  
56 cancer, *Health and Quality of Life Outcomes* 2015;13:107.
- 57  
58 18. Taylor RM, Fern LA, Barber JA, et al. Description of the BRIGHTLIGHT Cohort: the  
59 evaluation of teenagers and young adult cancer services in England, *BMJ Open*  
60 2019;9:e027797.
19. Kenten C, Martins A, Fern LA, et al. Qualitative study to understand the barriers to  
recruiting young people with cancer to BRIGHTLIGHT: a national cohort study in  
England, *BMJ Open* 2017;7:e01829.

Final version

20. Varni JW, Burwinkle TM, Seid M, et al. The PedsQL (TM) 4.0 as a pediatric population health measure: Feasibility, reliability and validity, *Ambulatory Pediatrics* 2003;3:329-41.
21. Varni J, Burwinkle T, Katz E, et al. The PedsQL in Pediatric Cancer: Reliability and validity of the Pediatric Quality of Life Inventory Generic Core Scales, Multidimensional Fatigue Scale, and Cancer Module, *Cancer* 2002;94:2090-106.
22. Fredericks EM, Magee JC, Opiari-Arrigan L, et al. Adherence and health-related quality of life in adolescent liver transplant recipients, *Pediatr Transplant* 2008;12:289-99.
23. King M, Jones L, Richardson A, et al. The relationship between patients' experiences of continuity of cancer care and health outcomes: a mixed methods study, *Br J Cancer* 2008;98:529-36.
24. Hsieh FY, Bioch DA, Larsen MD. Simple method of sample size calculation for linear and logistic regression, *Stat Med* 1998;17:1623-34.
25. Varni JW, Limbers CA. The PedsQL4.0 generic core scales young adult version: feasibility, reliability and validity in a university student population, *Journal of Health Psychology* 2009;14:611-22.
26. Department for Communities and Local Government. The English Indices of Deprivation 2015 Statistical Release. England: Department for Communities and Local Government 2015.
27. Henderson R, Diggle P, Dobson A. Joint modelling of longitudinal measurements and event time data. *Biostatistics* 2000;1:465-80.
28. Fulop NJ, Ramsay AIG, Perry C, et al. Explaining outcomes in major system change: a qualitative study of implementing centralised acute stroke services in two large metropolitan regions in England. *Implementation Science* 2016;11:80.
29. Vindrola-Padros C, Taylor RM, Lea S, et al. Mapping Adolescent Cancer Services: How Do Young People, Their Families, and Staff Describe Specialized Cancer Care in England?. *Cancer Nurs* 2016;39:358-66.
30. Kreuter F, Presser S, Tourangeau R. Social desirability bias in CATI, IVR, and web surveys: the effects of mode and question sensitivity, *Public Opinion Quarterly* 2008;72:847-65.

#### Author contributions:

RMT, LAF, JB, DS, SM, RF, LH, FG, RR, JSW were involved in developing the protocol. RMT coordinated the running of the study and was responsible for data acquisition. JB, JGA, RMT, LAF, SM, RF, DS, JSW contributed to the analysis. RMT, LAF, JB and JSW drafted the manuscript. All authors critically revised and approved the final manuscript.

#### Patient and public involvement:

Young people have been involved in this study from the feasibility stage onward. They were involved in study development, acted as co-researchers and were instrumental in the design and methods of the study. A representative of the Young Advisory Panel (YAP) was a co-applicant on the grant and the YAP have been part of the management of the study since the grant was awarded in 2011. Details of the extent of young people's involvement in BRIGHTLIGHT is provided in reference 13.

#### Acknowledgements:

Final version

1  
2  
3 We would like to thank the members of our Young Advisory Panel (Zeena Beale, Ciaran  
4 Fenton, Emily Freemantle, Jaasjan Guvindia, Laura Haddard, Steph Hammersley, Amy  
5 Lang, Joshua Lerner, Tanya Loughlin, Jason, Sin Jin Loo, Jennifer Miller, Maria Onasanya,  
6 Arif Nasir, Steph Still, Poppy Richards, Amy Riley, Lara Veitch, Freya Voss, JJ Wheeler,  
7 Max Williamson, Antonia Young), the 1,114 young people who consented to participate in  
8 BRIGHTLIGHT, healthcare professionals who approached and consented young people,  
9 and ex-members of the team who have contributed to study management (Catherine  
10 O'Hara, Anita Solanki, Natasha Aslam, Zuwena Fox).  
11  
12  
13

14 We would like to dedicate this manuscript in memory of Mr Stephen Sutton and Mr Mathew  
15 Cook who were instrumental to study set up, design and management. Both of whom died  
16 from their cancer during the study.  
17  
18

19 We would also like to thank the following for all their support with recruitment to  
20 BRIGHTLIGHT: the National Cancer Research Institute, especially Dr Eileen Loucaides and  
21 the Secretariat; Matt Seymour, Matt Cooper and Karen Poole at the former National Cancer  
22 Research Network; Maria Khan and Sabrina Sandhu (North West Knowledge Intelligence  
23 Team); TYAC; Teenage Cancer Trust; CLIC Sargent; Ipsos MORI; Quality Health and the  
24 research teams at 109 NHS Trusts in England who opened BRIGHTLIGHT to recruitment.  
25  
26

27 Principal Investigators agreeing to be acknowledged for their contribution to BRIGHTLIGHT  
28 recruitment:  
29

30 Claire Hemmaway, Barking, Havering and Redbridge Hospitals NHS Trust; Anita Amadi,  
31 Barnet and Chase Farm Hospitals NHS Trust; Keith Elliott, Barnsley Hospital NHS  
32 Foundation Trust; Leanne Smith, Blackpool, Fylde and Wyre Hospitals NHS Trust; Shirley  
33 Cocks, Bolton NHS Foundation Trust; Victoria Drew, Bradford Teaching Hospitals NHS  
34 Foundation Trust; Elizabeth Pask, Central Manchester University Hospitals NHS Foundation  
35 Trust; Anne Littley, Central Manchester University Hospitals NHS Foundation Trust; Mark  
36 Bower, Chelsea and Westminster Hospital NHS Trust; Scott Marshall, City Hospitals  
37 Sunderland NHS Foundation Trust; Lorna Dewar, Colchester Hospital University NHS Trust;  
38 Nnenna Osuji, Croydon Health Services NHS Trust; David Allotey, Derby Hospitals NHS  
39 Foundation Trust; Karen Jewers, East Lancashire Hospitals NHS Trust; Asha Johny,  
40 Gloucestershire Hospitals NHS Foundation Trust; Nicola Knightly, Great Western Hospitals  
41 NHS Foundation Trust; Robert Carr, Guy's & St Thomas' Hospital NHS Foundation Trust;  
42 Alison Milne, Hampshire Hospitals NHS Foundation Trust; Claire Hall, Harrogate and District  
43 NHS Foundation Trust; James Bailey, Hull and East Yorkshire Hospitals NHS Trust;  
44 Christine Garlick, Ipswich Hospital NHS Foundation Trust; Alison Brown, Isle of Wight  
45 Healthcare NHS Trust; Carolyn Hatch, Lancashire Teaching Hospitals NHS Foundation  
46 Trust; Vivienne E. Andrews, Medway NHS Foundation Trust; Sara Greig, Milton Keynes  
47 Hospital NHS Foundation Trust; Jennifer Wimperis, Norfolk and Norwich University Hospital  
48 NHS Trust; Suriya Kirkpatrick, North Bristol NHS Trust; Jonathan Nicoll, North Cumbria  
49 University Hospitals NHS Trust; Ivo Hennig, Nottingham University Hospitals NHS Trust;  
50 Karen Sherbourne, Oxford Radcliffe Hospital NHS Trust; Clare Turner, Plymouth Hospitals  
51 NHS Trust; Claire Palles-Clark, Royal Surrey County Hospital NHS Trust; Christine Cox,  
52 Royal United Hospital Bath NHS Trust; Yeng Ang, Salford Royal NHS Foundation Trust;  
53 Jonathan Cullis, Salisbury NHS Foundation Trust; Daniel Yeomanson, Sheffield Children's  
54 NHS Foundation Trust; Ruth Logan, Sheffield Teaching Hospitals NHS Foundation Trust;  
55 Deborah Turner, South Devon Healthcare NHS Trust; Dianne Plews, South Tees Hospitals  
56  
57  
58  
59  
60

Final version

1  
2  
3 NHS Trust; Juliah Jonasi, Southend University Hospital NHS Foundation Trust; Ruth  
4 Pettengell, St George's Healthcare NHS Trust; Kamal Khoobarry, Surrey & Sussex  
5 Healthcare NHS Trust; Angela Watts, The Dudley Group of Hospitals NHS Foundation Trust;  
6 Louise Soanes, The Royal Marsden NHS Foundation Trust; Claudette Jones, The Royal  
7 Orthopaedic Hospital NHS Trust; Michael Jenkinson, The Walton Centre for Neurology and  
8 Neurosurgery NHS Trust; Nicky Pettitt, University Hospital Birmingham NHS Foundation  
9 Trust; Vijay Agarwal, University Hospital Birmingham NHS Foundation Trust; Beth Harrison,  
10 University Hospitals Coventry and Warwickshire NHS Trust; Fiona Miall, University Hospitals  
11 of Leicester NHS Trust; Gail Wiley, University Hospitals of Morecambe Bay NHS Trust;  
12 Lynda Wagstaff, Walsall Hospitals NHS Trust; Fiona Smith, West Hertfordshire Hospitals  
13 NHS Trust; Sarah Janes, Western Sussex NHS Trust; Serena Hillman, Weston Area Health  
14 NHS Trust; Christopher Zaborowski, Yeovil District Hospital NHS Foundation Trust.  
15  
16  
17  
18

19 Data for this study is based on information collected and quality assured by the PHE  
20 National Cancer Registration and Analysis Service. Access to the data was facilitated by the  
21 PHE Office for Data Release.  
22

23  
24 The Quality of Life study described in this paper was carried out using the PedsQL,  
25 developed by Dr James W. Varni.  
26

27 Competing interests:  
28 None declared.  
29

30  
31 Ethics Approval:  
32 The study was approved by the Health Research Authority Confidentiality Advisory Group  
33 (reference ECC 8-05(d)/2011) and London Bloomsbury NHS Research Ethics Committee  
34 (reference LO/11/1718).  
35

36  
37 Funding:  
38 This paper presents independent research funded by the National Institute for Health  
39 Research (NIHR) under its Programme Grants for Applied Research Programme (Grant  
40 Reference Number RP-PG-1209-10013). The views expressed are those of the author(s)  
41 and not necessarily those of the NHS, the NIHR or the Department of Health. The  
42 BRIGHTLIGHT Team acknowledges the support of the NIHR, through the Cancer Research  
43 Network.  
44  
45

46  
47 LAF and LH are funded by Teenage Cancer Trust, DS holds research grant funding from  
48 Teenage Cancer Trust, and RR was (in part) supported by the National Institute for Health  
49 Research (NIHR) Collaboration for Leadership in Applied Health Research and Care  
50 (CLAHRC) North Thames at Bart's Health NHS Trust. RMT is a National Institute for Health  
51 Research (NIHR) Senior Nurse Research Leader. The views expressed in this article are  
52 those of the author and not necessarily those of the NIHR, or the Department of Health and  
53 Social Care. None of the funding bodies have been involved with study concept, design or  
54 decision to submit the manuscript. JAG was subsidised by the Ramon & Cajal programme  
55 operated by the Ministry of Economy and Business (RYC-2016-19353), and the European  
56 Social Fund.  
57  
58

59  
60 Data sharing statement:

Final version

Further details of the BRIGHTLIGHT programme of work are available through the study website ([www.brightlightstudy.com](http://www.brightlightstudy.com)). Data that are not held under licence with Public Health England or NHS Digital will be available from late 2020 when the primary analysis is complete. We welcome collaboration, for general data sharing enquiries please contact RMT ([rtaylor13@nhs.net](mailto:rtaylor13@nhs.net)).

For peer review only

1  
2  
3  
4  
5  
6  
7  
8  
9  
10  
11  
12  
13  
14  
15  
16  
17  
18  
19  
20  
21  
22  
23  
24  
25  
26  
27  
28  
29  
30  
31  
32  
33  
34  
35  
36  
37  
38  
39  
40  
41  
42  
43  
44  
45  
46  
47  
48  
49  
50  
51  
52  
53  
54  
55  
56  
57  
58  
59  
60

Final version

## Figure legends

### Figure 1: Participation at each wave of data collection

\*Drop-outs between waves due to death, permanent optout or wave opt-out. Wave opt-outs prior to being issued were not permanent opt-outs; participants could opt-out of a single wave but participate in subsequent waves; these cases were not removed from the cohort permanently.

### Figure 2: Mean PedsQL total score over time since diagnosis (with 95% confidence intervals)

Graph based on data collected in Waves 1 to 5, plotted against median time since diagnosis.

### Figure 3: Subgroup investigations for cancer type (leukaemia/lymphoma v other) and age group (<19 v 19+): Results from adjusted\* random effects models with interaction terms (N=733)

\* model with a random effect for city and adjustment for time since diagnosis, age at diagnosis, type of cancer, socioeconomic status, severity of cancer, ethnicity, Choice about where to receive treatment, Long term condition prior to cancer, days from 1st symptom to diagnosis, number of GP visits before diagnosis.

### Figure 4: Mean PedsQL domain scores over time since diagnosis (with 95% confidence intervals)

(Graphs based on data collected in Waves 1 to 5, plotted against median time since diagnosis.)

Figure 4a: Physical functioning

Figure 4b: Emotional functioning

Figure 4c: Social functioning

Figure 4d: Work/school/college functioning

Figure 4e Psychosocial summary score

1  
2  
3  
4  
5  
6  
7  
8  
9  
10  
11  
12  
13  
14  
15  
16  
17  
18  
19  
20  
21  
22  
23  
24  
25  
26  
27  
28  
29  
30  
31  
32  
33  
34  
35  
36  
37  
38  
39  
40  
41  
42  
43  
44  
45  
46  
47  
48  
49  
50  
51  
52  
53  
54  
55  
56  
57  
58  
59  
60

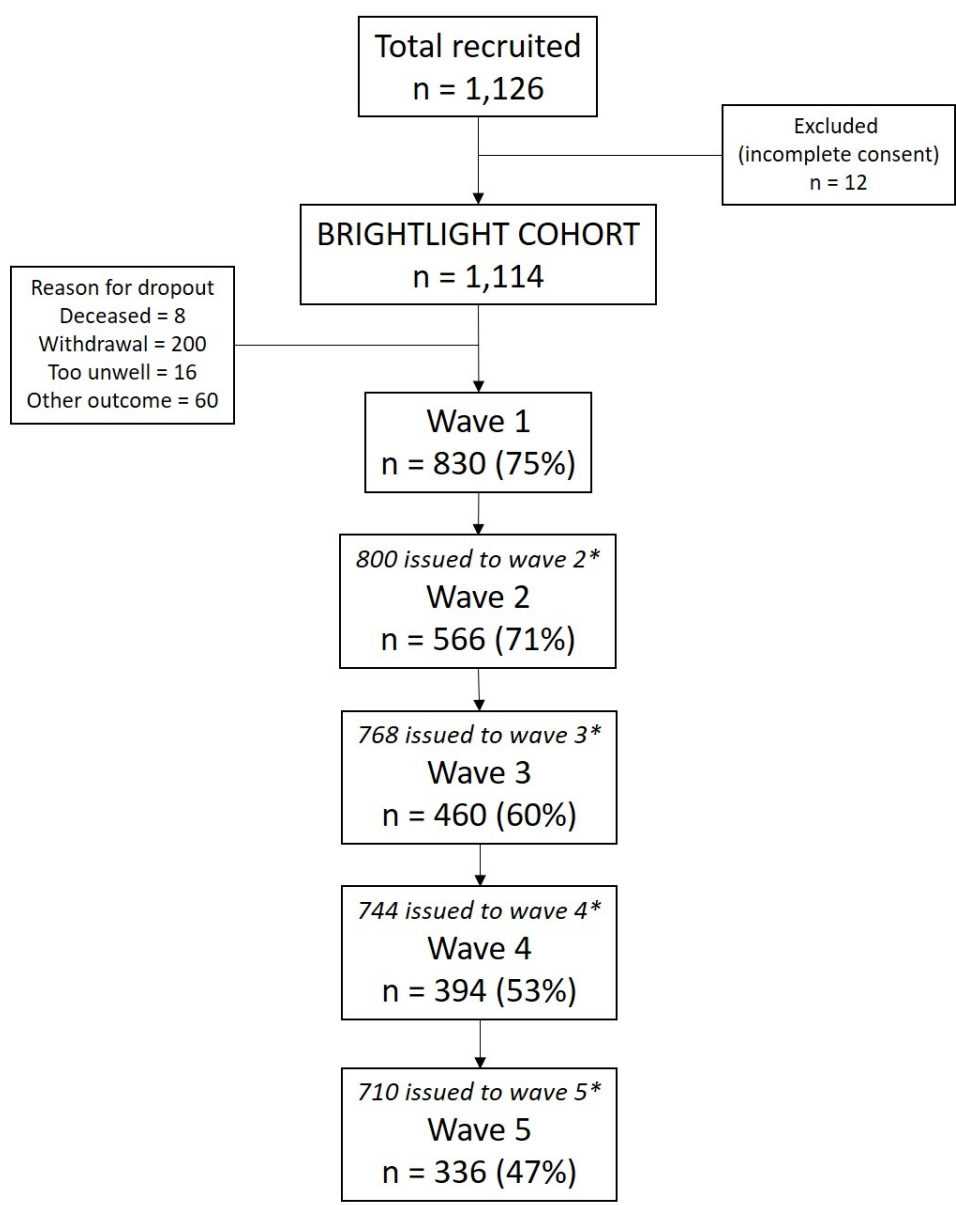

170x216mm (150 x 150 DPI)

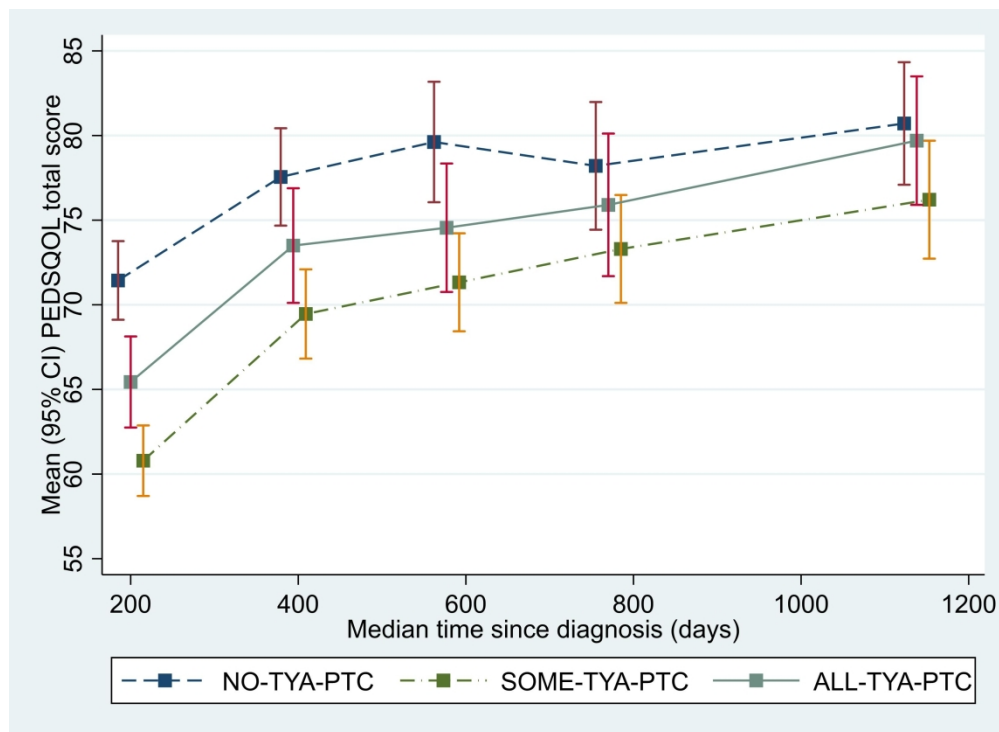

697x507mm (120 x 120 DPI)



1  
2  
3  
4  
5  
6  
7  
8  
9  
10  
11  
12  
13  
14  
15  
16  
17  
18  
19  
20  
21  
22  
23  
24  
25  
26  
27  
28  
29  
30  
31  
32  
33  
34  
35  
36  
37  
38  
39  
40  
41  
42  
43  
44  
45  
46  
47  
48  
49  
50  
51  
52  
53  
54  
55  
56  
57  
58  
59  
60

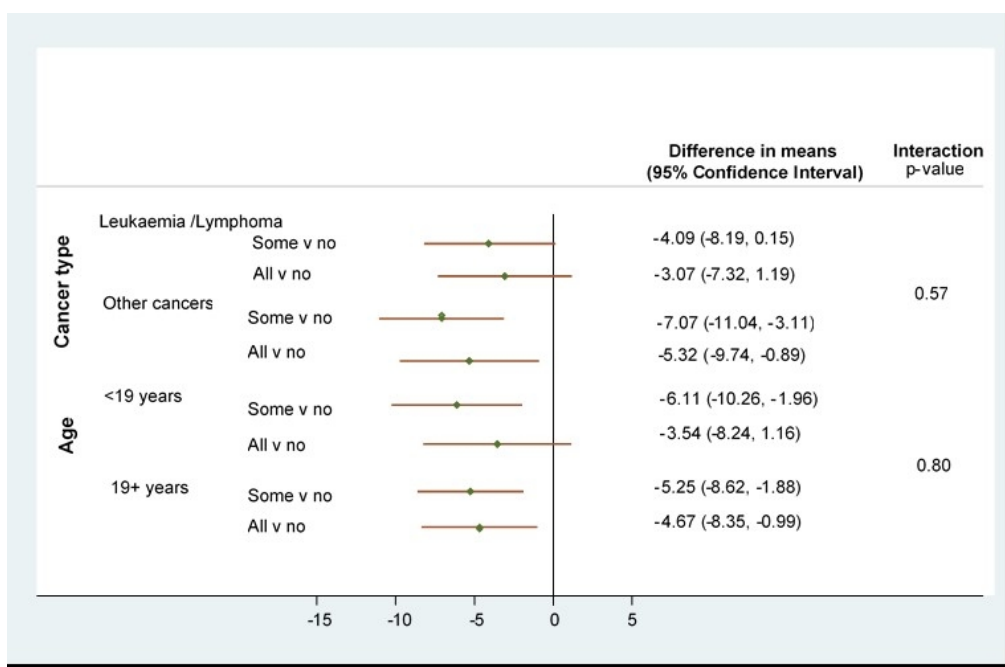

159x104mm (120 x 120 DPI)

1  
2  
3  
4  
5  
6  
7  
8  
9  
10  
11  
12  
13  
14  
15  
16  
17  
18  
19  
20  
21  
22  
23  
24  
25  
26  
27  
28  
29  
30  
31  
32  
33  
34  
35  
36  
37  
38  
39  
40  
41  
42  
43  
44  
45  
46  
47  
48  
49  
50  
51  
52  
53  
54  
55  
56  
57  
58  
59  
60

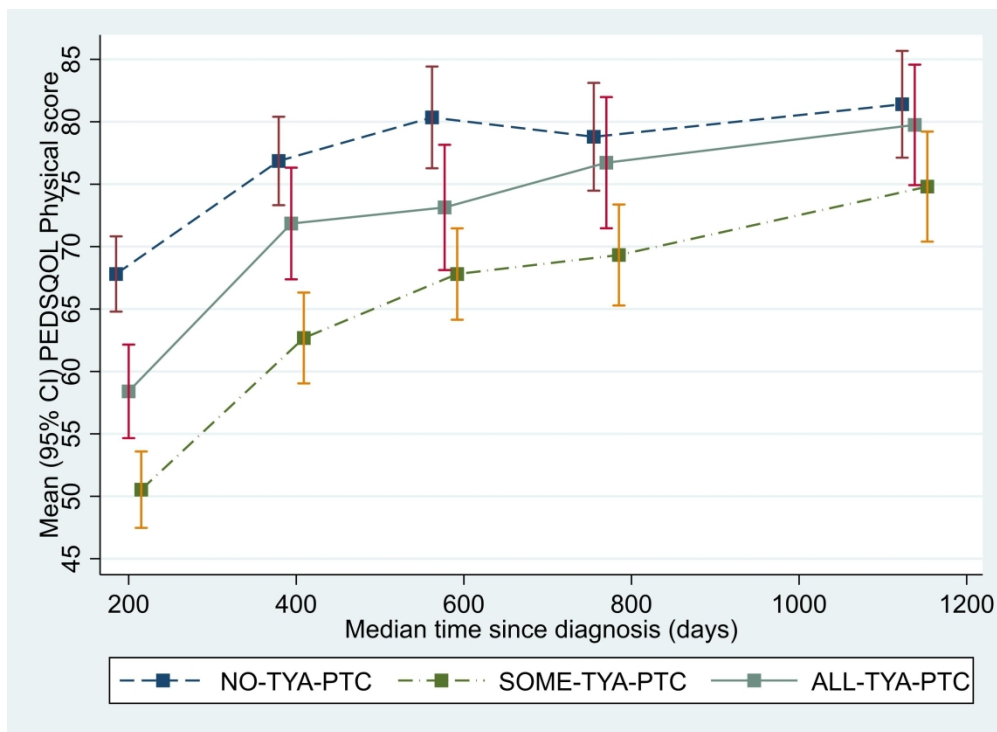

697x507mm (120 x 120 DPI)

1  
2  
3  
4  
5  
6  
7  
8  
9  
10  
11  
12  
13  
14  
15  
16  
17  
18  
19  
20  
21  
22  
23  
24  
25  
26  
27  
28  
29  
30  
31  
32  
33  
34  
35  
36  
37  
38  
39  
40  
41  
42  
43  
44  
45  
46  
47  
48  
49  
50  
51  
52  
53  
54  
55  
56  
57  
58  
59  
60

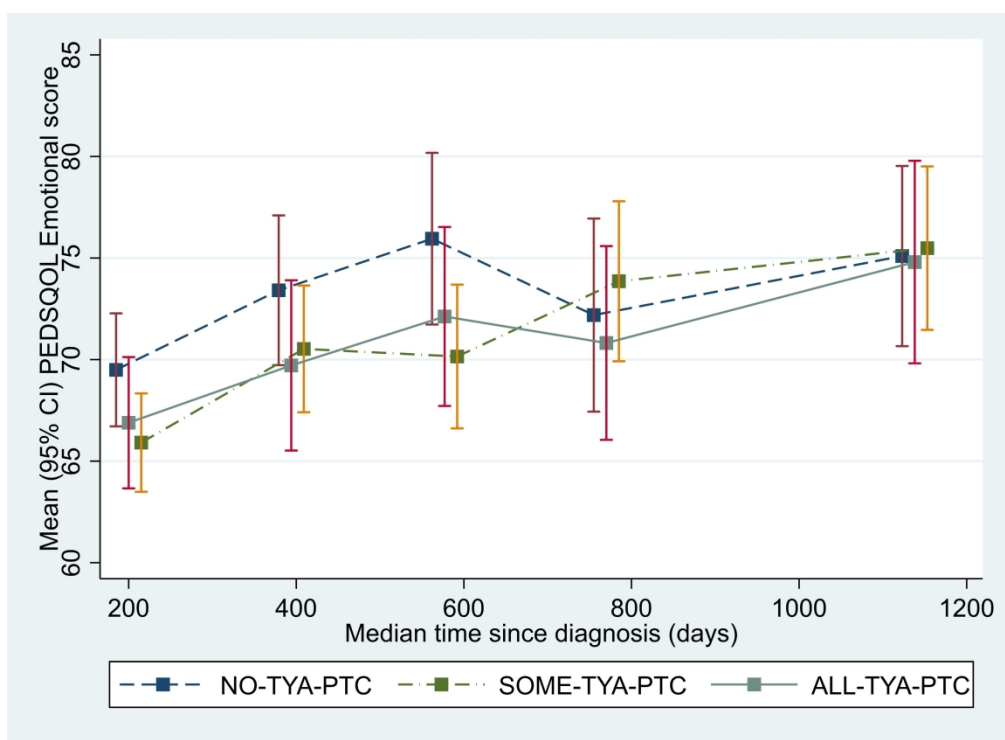

697x507mm (120 x 120 DPI)

1  
2  
3  
4  
5  
6  
7  
8  
9  
10  
11  
12  
13  
14  
15  
16  
17  
18  
19  
20  
21  
22  
23  
24  
25  
26  
27  
28  
29  
30  
31  
32  
33  
34  
35  
36  
37  
38  
39  
40  
41  
42  
43  
44  
45  
46  
47  
48  
49  
50  
51  
52  
53  
54  
55  
56  
57  
58  
59  
60

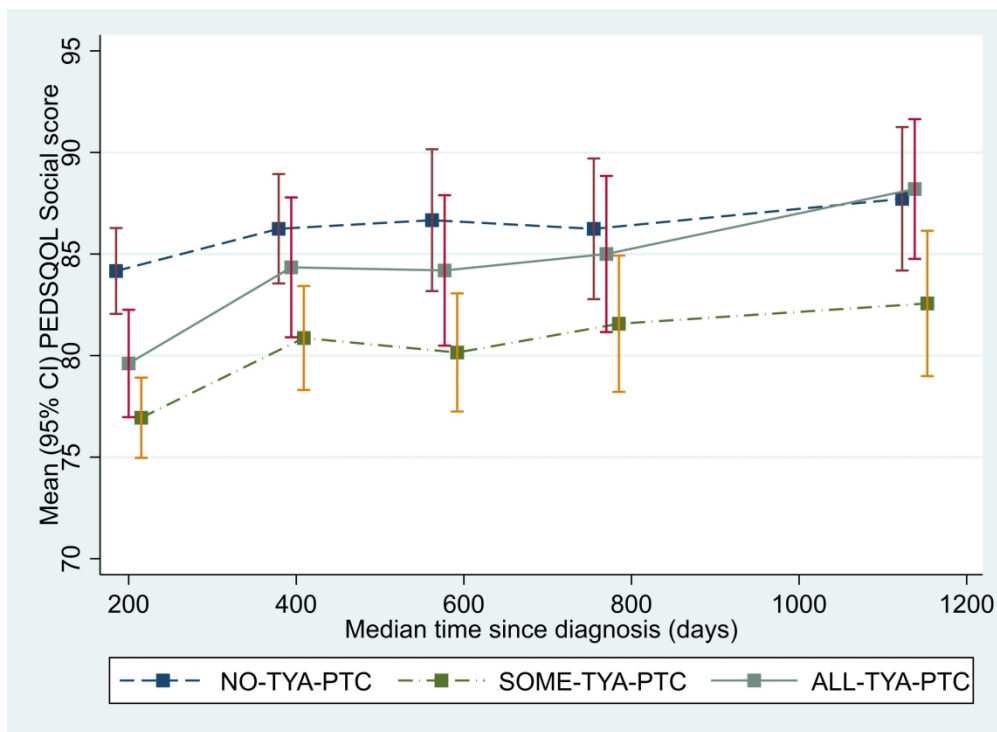

697x507mm (120 x 120 DPI)

1  
2  
3  
4  
5  
6  
7  
8  
9  
10  
11  
12  
13  
14  
15  
16  
17  
18  
19  
20  
21  
22  
23  
24  
25  
26  
27  
28  
29  
30  
31  
32  
33  
34  
35  
36  
37  
38  
39  
40  
41  
42  
43  
44  
45  
46  
47  
48  
49  
50  
51  
52  
53  
54  
55  
56  
57  
58  
59  
60

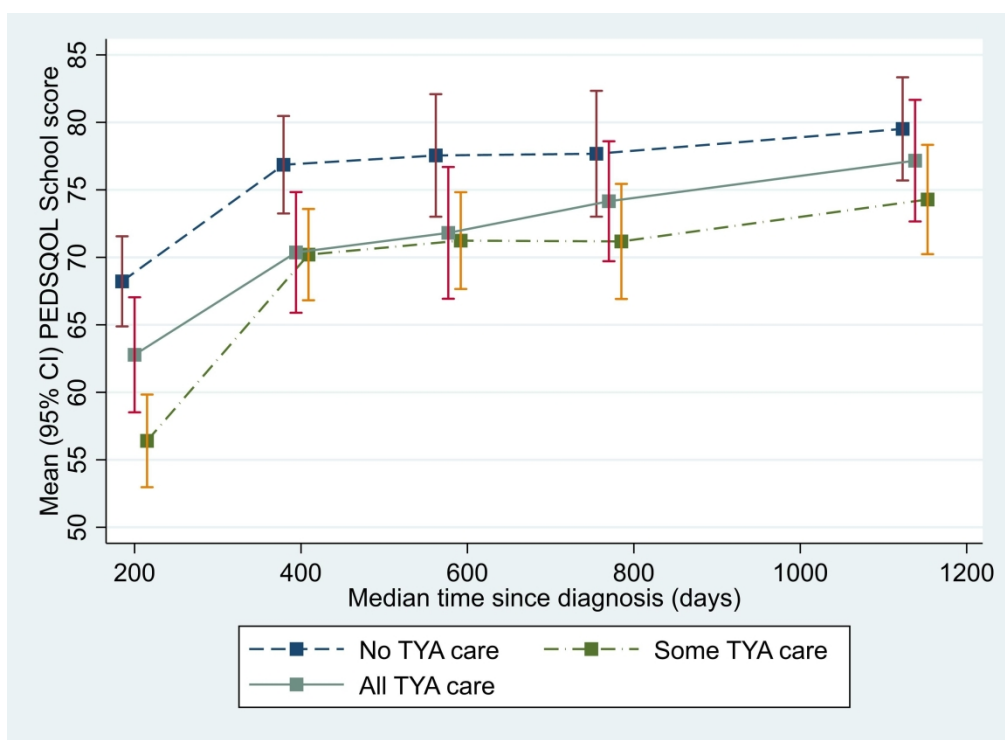

697x507mm (120 x 120 DPI)

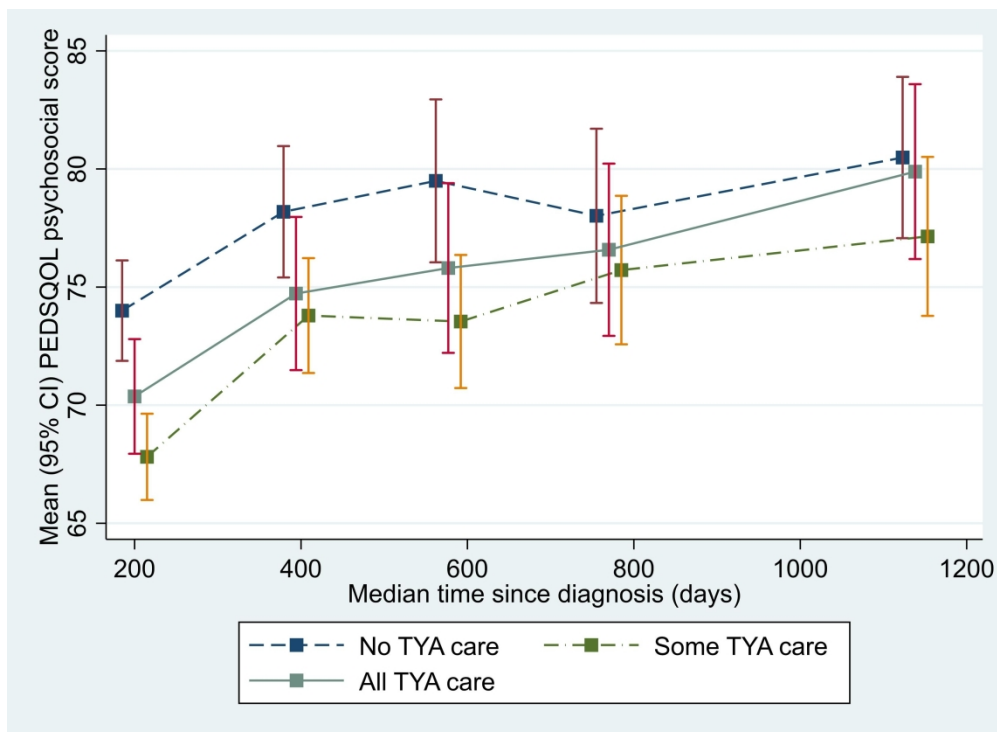

697x507mm (120 x 120 DPI)

Supplemental file

Figure A1: Matrix representing the causal diagram explaining confounding variable to enter in the Directed Acyclic Graph (DAG)

|           | TYA SCL | QOL | Age | Choice | CS | CT | DoH | Ethnicity | Finances | Gender | Geography | I&C | LTC | RtD | SE | SES | SS |
|-----------|---------|-----|-----|--------|----|----|-----|-----------|----------|--------|-----------|-----|-----|-----|----|-----|----|
| TYA SCL   |         | ↗   | ↘   | ↘      | ↘  | ↘  | ↗   | ↘         | ↘        | O      | ↘         | ↗   | ↘   | ↘   | ↗  | ↘   | ↘  |
| QOL       |         |     | ↘   | ↘      | ↘  | ↘  | ↘   | ↘         | ↘        | ↘      | ↘         | ↘   | ↘   | ↘   | ↘  | ↘   | ↘  |
| Age       |         |     |     | ↗      | O  | ↗  | ↗   | O         | ↗        | O      | O         | ↗   | ↗   | ↗   | ↗  | ↗   | ↗  |
| Choice    |         |     |     |        | ↘  | ↘  | O   | ↘         | ↗        | O      | ↘         | ↗   | ↘   | ↘   | ↗  | ↘   | ↘  |
| CS        |         |     |     |        |    | ↘  | ↗   | ↘         | ↗        | O      | ↘         | ↗   | ↘   | ↘   | ↗  | ↘   | ↘  |
| CT        |         |     |     |        |    |    | ↗   | ↘         | ↗        | ↘      | ↘         | ↗   | ↘   | ↘   | ↗  | ↘   | ↘  |
| DoH       |         |     |     |        |    |    |     | ↘         | ↗        | ↘      | ↘         | ↗   | ↘   | ↘   | ↗  | ↘   | ↘  |
| Ethnicity |         |     |     |        |    |    |     |           | ↗        | O      | ↘         | ↗   | ↘   | ↘   | ↗  | ↘   | ↘  |
| Finances  |         |     |     |        |    |    |     |           |          | O      | ↘         | ↘   | ↘   | ↘   | O  | ↘   | ↘  |
| Gender    |         |     |     |        |    |    |     |           |          |        | O         | ↗   | ↗   | ↗   | ↗  | O   | ↗  |
| Geography |         |     |     |        |    |    |     |           |          |        |           | ↗   | ↗   | ↗   | ↗  | ↗   | ↗  |
| I&C       |         |     |     |        |    |    |     |           |          |        |           |     | ↘   | ↘   | ↗  | ↘   | ↘  |
| LTC       |         |     |     |        |    |    |     |           |          |        |           |     |     | ↗   | ↗  | ↘   | ↘  |
| RtD       |         |     |     |        |    |    |     |           |          |        |           |     |     |     | ↗  | ↘   | ↗  |
| SE        |         |     |     |        |    |    |     |           |          |        |           |     |     |     |    | ↘   | ↗  |
| SES       |         |     |     |        |    |    |     |           |          |        |           |     |     |     |    |     | ↗  |
| SS        |         |     |     |        |    |    |     |           |          |        |           |     |     |     |    |     |    |

CS: cancer severity; CT: cancer type; DoH: duration of hospitalisation; I&C: information & communication; LTC: long-term condition; QOL: quality of life; RtD: route to diagnosis; SE: symptom experience; SES: socioeconomic status; SS: social support  
 O – indicates a null relationship

Table A1: PedsQL total score by Wave of data collection

|        | NO-TYA-PTC |               |                        | SOME-TYA-PTC |               |                        | ALL-TYA-PTC |               |                        |
|--------|------------|---------------|------------------------|--------------|---------------|------------------------|-------------|---------------|------------------------|
|        | N          | Mean (SD)     | Median (IQR)           | N            | Mean (SD)     | Median (IQR)           | N           | Mean (SD)     | Median (IQR)           |
| Wave 1 | 276        | 71.44 (19.68) | 73.22 (57.61 to 89.13) | 312          | 60.79 (18.79) | 59.71 (47.52 to 75.00) | 193         | 65.44 (19.07) | 66.30 (52.78 to 80.56) |
| Wave 2 | 173        | 77.55 (19.31) | 83.70 (61.96 to 93.48) | 209          | 69.46 (19.45) | 71.74 (54.35 to 85.87) | 122         | 73.50 (19.08) | 77.17 (58.33 to 88.04) |
| Wave 3 | 126        | 79.62 (20.38) | 85.87 (68.48 to 95.65) | 164          | 71.33 (18.91) | 73.76 (59.75 to 84.78) | 99          | 74.55 (19.26) | 80.43 (59.72 to 91.30) |
| Wave 4 | 121        | 78.21 (21.16) | 84.78 (64.13 to 95.65) | 118          | 73.30 (33.33) | 76.24 (60.87 to 86.96) | 98          | 75.90 (21.27) | 82.61 (61.96 to 93.48) |
| Wave 5 | 103        | 80.71 (18.75) | 86.96 (71.74 to 95.65) | 113          | 76.21 (18.90) | 78.26 (65.22 to 93.48) | 75          | 79.70 (16.78) | 85.87 (70.65 to 91.30) |

Table A2: Results from adjusted mixed effects models investigating the relationship between levels of TYA care received during the first 12 months from diagnosis and the quality of life – excluding bone cancer (N=667)

|                                  |              | Difference in means | 95% Confidence Interval | P-value  |
|----------------------------------|--------------|---------------------|-------------------------|----------|
| TYA care category (v NO-TYA-PTC) | SOME-TYA-PTC | -6.02               | -9.02 to -3.02          | P=0.0003 |
|                                  | ALL-TYA-PTC  | -4.53               | -7.72 to -1.35          |          |

\* results from a three level model for repeated measurements of QOL over time since diagnosis, with a random effect for city and adjustment for time since diagnosis, age at diagnosis, type of cancer, socioeconomic status, severity of cancer, ethnicity, choice about where to receive treatment, long-term condition prior to cancer, days from 1<sup>st</sup> symptom to diagnosis, number of GP visits before diagnosis.



Table A3: Subgroup investigation for lymphoma v other cancer: Results from adjusted\* mixed effects models with interaction terms (N=733)

|                    | <b>TYA care category</b>  | <b>Adjusted difference in means</b> | <b>95% confidence interval</b> | <b>P-value from interaction</b> |
|--------------------|---------------------------|-------------------------------------|--------------------------------|---------------------------------|
| <b>Cancer type</b> |                           |                                     |                                |                                 |
| Lymphoma           | SOME-TYA-PTC v NO-TYA-PTC | -6.01                               | -9.58 to -2.44                 | 0.90                            |
|                    | ALL-TYA-PTC v NO-TYA-PTC  | -4.13                               | -8.08 to -0.17                 |                                 |
| All other cancers  | SOME-TYA-PTC v NO-TYA-PTC | -4.89                               | -9.63 to -0.16                 |                                 |
|                    | ALL-TYA-PTC v NO-TYA-PTC  | -4.31                               | -9.18 to 0.55                  |                                 |

\* model with a random effect for city and adjustment for time since diagnosis, age at diagnosis, type of cancer, socioeconomic status, severity of cancer, ethnicity, choice about where to receive treatment, long-term condition prior to cancer, days from 1<sup>st</sup> symptom to diagnosis, number of GP visits before diagnosis.

Table A4: Results from a joint model of longitudinal quality of life scores and survival investigating their relationship with level of TYA care received during the first 12 months from diagnosis (N=733)\*

|                                  |              | <b>Difference in means</b> | <b>95% Confidence Interval</b> |
|----------------------------------|--------------|----------------------------|--------------------------------|
| TYA care category (v NO-TYA-PTC) | SOME-TYA-PTC | -6.45                      | -9.34 to -3.56                 |
|                                  | ALL-TYA-PTC  | -6.11                      | -9.58 to -2.64                 |

\* Models fitted using Stata command *stjm* with a Weibull submodel for survival (reference: M Crowther, K Abrams, P Lambert. Joint modelling of longitudinal and survival data. The Stata Journal (2013) 13, Number 1, pp. 165–184) Adjustment for time since diagnosis, age at diagnosis, type of cancer, socioeconomic status, severity of cancer, ethnicity, choice about where to receive treatment, long-term condition prior to cancer, days from 1<sup>st</sup> symptom to diagnosis, number of GP visits before diagnosis and city (as a fixed effect as a three level model could not be fitted).

**STROBE 2007 (v4) Statement—Checklist of items that should be included in reports of *cohort studies***

| Section/Topic                | Item # | Recommendation                                                                                                                                                                       | Reported on page #              |
|------------------------------|--------|--------------------------------------------------------------------------------------------------------------------------------------------------------------------------------------|---------------------------------|
| <b>Title and abstract</b>    | 1      | (a) Indicate the study's design with a commonly used term in the title or the abstract                                                                                               | 1                               |
|                              |        | (b) Provide in the abstract an informative and balanced summary of what was done and what was found                                                                                  | 2-3                             |
| <b>Introduction</b>          |        |                                                                                                                                                                                      |                                 |
| Background/rationale         | 2      | Explain the scientific background and rationale for the investigation being reported                                                                                                 | 3-4                             |
| Objectives                   | 3      | State specific objectives, including any prespecified hypotheses                                                                                                                     | 4                               |
| <b>Methods</b>               |        |                                                                                                                                                                                      |                                 |
| Study design                 | 4      | Present key elements of study design early in the paper                                                                                                                              | 4                               |
| Setting                      | 5      | Describe the setting, locations, and relevant dates, including periods of recruitment, exposure, follow-up, and data collection                                                      | 5                               |
| Participants                 | 6      | (a) Give the eligibility criteria, and the sources and methods of selection of participants. Describe methods of follow-up                                                           | 5 (reference cited for details) |
|                              |        | (b) For matched studies, give matching criteria and number of exposed and unexposed                                                                                                  | na                              |
| Variables                    | 7      | Clearly define all outcomes, exposures, predictors, potential confounders, and effect modifiers. Give diagnostic criteria, if applicable                                             | 5                               |
| Data sources/<br>measurement | 8*     | For each variable of interest, give sources of data and details of methods of assessment (measurement). Describe comparability of assessment methods if there is more than one group | 5                               |
| Bias                         | 9      | Describe any efforts to address potential sources of bias                                                                                                                            | 6                               |
| Study size                   | 10     | Explain how the study size was arrived at                                                                                                                                            | 5                               |
| Quantitative variables       | 11     | Explain how quantitative variables were handled in the analyses. If applicable, describe which groupings were chosen and why                                                         | 6                               |
| Statistical methods          | 12     | (a) Describe all statistical methods, including those used to control for confounding                                                                                                | 6                               |
|                              |        | (b) Describe any methods used to examine subgroups and interactions                                                                                                                  | 6                               |
|                              |        | (c) Explain how missing data were addressed                                                                                                                                          | 6                               |
|                              |        | (d) If applicable, explain how loss to follow-up was addressed                                                                                                                       | 6                               |
|                              |        | (e) Describe any sensitivity analyses                                                                                                                                                | 6                               |

|                          |     |                                                                                                                                                                                                              |                                            |
|--------------------------|-----|--------------------------------------------------------------------------------------------------------------------------------------------------------------------------------------------------------------|--------------------------------------------|
| <b>Results</b>           |     |                                                                                                                                                                                                              |                                            |
| Participants             | 13* | (a) Report numbers of individuals at each stage of study—eg numbers potentially eligible, examined for eligibility, confirmed eligible, included in the study, completing follow-up, and analysed            | 6, reference cited, also supplemental file |
|                          |     | (b) Give reasons for non-participation at each stage                                                                                                                                                         | supplemental file                          |
|                          |     | (c) Consider use of a flow diagram                                                                                                                                                                           | supplemental file                          |
| Descriptive data         | 14* | (a) Give characteristics of study participants (eg demographic, clinical, social) and information on exposures and potential confounders                                                                     | 8                                          |
|                          |     | (b) Indicate number of participants with missing data for each variable of interest                                                                                                                          | supplemental file                          |
|                          |     | (c) Summarise follow-up time (eg, average and total amount)                                                                                                                                                  | supplemental file                          |
| Outcome data             | 15* | Report numbers of outcome events or summary measures over time                                                                                                                                               | supplemental file                          |
| Main results             | 16  | (a) Give unadjusted estimates and, if applicable, confounder-adjusted estimates and their precision (eg, 95% confidence interval). Make clear which confounders were adjusted for and why they were included | 11                                         |
|                          |     | (b) Report category boundaries when continuous variables were categorized                                                                                                                                    | na                                         |
|                          |     | (c) If relevant, consider translating estimates of relative risk into absolute risk for a meaningful time period                                                                                             | na                                         |
| Other analyses           | 17  | Report other analyses done—eg analyses of subgroups and interactions, and sensitivity analyses                                                                                                               | 11 and supplemental file                   |
| <b>Discussion</b>        |     |                                                                                                                                                                                                              |                                            |
| Key results              | 18  | Summarise key results with reference to study objectives                                                                                                                                                     | 12                                         |
| <b>Limitations</b>       |     |                                                                                                                                                                                                              |                                            |
| Interpretation           | 20  | Give a cautious overall interpretation of results considering objectives, limitations, multiplicity of analyses, results from similar studies, and other relevant evidence                                   | 13-14                                      |
| Generalisability         | 21  | Discuss the generalisability (external validity) of the study results                                                                                                                                        | 13-14                                      |
| <b>Other information</b> |     |                                                                                                                                                                                                              |                                            |
| Funding                  | 22  | Give the source of funding and the role of the funders for the present study and, if applicable, for the original study on which the present article is based                                                | 16                                         |

\*Give information separately for cases and controls in case-control studies and, if applicable, for exposed and unexposed groups in cohort and cross-sectional studies.

1  
2 **Note:** An Explanation and Elaboration article discusses each checklist item and gives methodological background and published examples of transparent reporting. The STROBE  
3 checklist is best used in conjunction with this article (freely available on the Web sites of PLoS Medicine at <http://www.plosmedicine.org/>, Annals of Internal Medicine at  
4 <http://www.annals.org/>, and Epidemiology at <http://www.epidem.com/>). Information on the STROBE Initiative is available at [www.strobe-statement.org](http://www.strobe-statement.org).  
5  
6  
7  
8  
9  
10  
11  
12  
13  
14  
15  
16  
17  
18  
19  
20  
21  
22  
23  
24  
25  
26  
27  
28  
29  
30  
31  
32  
33  
34  
35  
36  
37  
38  
39  
40  
41  
42  
43  
44  
45  
46

For peer review only

# BMJ Open

## Longitudinal cohort study of the impact of specialist cancer services for teenagers and young adults on quality of life: outcomes from the BRIGHTLIGHT study

|                                 |                                                                                                                                                                                                                                                                                                                                                                                                                                                                                                                                                                                                                                                                                                                                                                                                                                                                                                                                                                                                                                                                                                                                                                       |
|---------------------------------|-----------------------------------------------------------------------------------------------------------------------------------------------------------------------------------------------------------------------------------------------------------------------------------------------------------------------------------------------------------------------------------------------------------------------------------------------------------------------------------------------------------------------------------------------------------------------------------------------------------------------------------------------------------------------------------------------------------------------------------------------------------------------------------------------------------------------------------------------------------------------------------------------------------------------------------------------------------------------------------------------------------------------------------------------------------------------------------------------------------------------------------------------------------------------|
| Journal:                        | <i>BMJ Open</i>                                                                                                                                                                                                                                                                                                                                                                                                                                                                                                                                                                                                                                                                                                                                                                                                                                                                                                                                                                                                                                                                                                                                                       |
| Manuscript ID                   | bmjopen-2020-038471.R1                                                                                                                                                                                                                                                                                                                                                                                                                                                                                                                                                                                                                                                                                                                                                                                                                                                                                                                                                                                                                                                                                                                                                |
| Article Type:                   | Original research                                                                                                                                                                                                                                                                                                                                                                                                                                                                                                                                                                                                                                                                                                                                                                                                                                                                                                                                                                                                                                                                                                                                                     |
| Date Submitted by the Author:   | 05-Aug-2020                                                                                                                                                                                                                                                                                                                                                                                                                                                                                                                                                                                                                                                                                                                                                                                                                                                                                                                                                                                                                                                                                                                                                           |
| Complete List of Authors:       | Taylor, Rachel; University College London Hospitals NHS Foundation Trust, CNMAR<br>Fern, Lorna; University College London Hospitals NHS Foundation Trust, Oncology<br>Barber, Julie; University College London, Department of Statistical Science<br>Alvarez-Galvez, Javier; University of Cadiz, Department of Biomedicine, Biotechnology and Public Health<br>Feltbower, Richard; University of Leeds,<br>Lea, Sarah; University College London Hospitals NHS Foundation Trust<br>Martins, Ana; University College London Hospitals NHS Foundation Trust<br>Morris, Stephen; University of Cambridge School of Clinical Medicine, Primary Care Unit<br>Hooker, Louise; University Hospital Southampton NHS Foundation Trust, Wessex Teenage and Young Adult Cancer Service,<br>Gibson, Faith; University of Surrey, Faculty of Health and Medical Sciences; Great Ormond Street Hospital For Children NHS Foundation Trust,<br>Raine, Rosalind; University College London, Institute of Epidemiology & Health<br>Stark, Dan; University of Leeds, Leeds Insitute of Molecular Medicine<br>Whelan, Jeremy; University College London Hospitals NHS Foundation Trust, |
| <b>Primary Subject Heading</b>: | Health services research                                                                                                                                                                                                                                                                                                                                                                                                                                                                                                                                                                                                                                                                                                                                                                                                                                                                                                                                                                                                                                                                                                                                              |
| Secondary Subject Heading:      | Oncology                                                                                                                                                                                                                                                                                                                                                                                                                                                                                                                                                                                                                                                                                                                                                                                                                                                                                                                                                                                                                                                                                                                                                              |
| Keywords:                       | Organisation of health services < HEALTH SERVICES ADMINISTRATION & MANAGEMENT, ONCOLOGY, Quality in health care < HEALTH SERVICES ADMINISTRATION & MANAGEMENT                                                                                                                                                                                                                                                                                                                                                                                                                                                                                                                                                                                                                                                                                                                                                                                                                                                                                                                                                                                                         |
|                                 |                                                                                                                                                                                                                                                                                                                                                                                                                                                                                                                                                                                                                                                                                                                                                                                                                                                                                                                                                                                                                                                                                                                                                                       |

SCHOLARONE™  
Manuscripts

1  
2  
3  
4  
5  
6  
7  
8  
9  
10  
11  
12  
13  
14  
15  
16  
17  
18  
19  
20  
21  
22  
23  
24  
25  
26  
27  
28  
29  
30  
31  
32  
33  
34  
35  
36  
37  
38  
39  
40  
41  
42  
43  
44  
45  
46  
47  
48  
49  
50  
51  
52  
53  
54  
55  
56  
57  
58  
59  
60



I, the Submitting Author has the right to grant and does grant on behalf of all authors of the Work (as defined in the below author licence), an exclusive licence and/or a non-exclusive licence for contributions from authors who are: i) UK Crown employees; ii) where BMJ has agreed a CC-BY licence shall apply, and/or iii) in accordance with the terms applicable for US Federal Government officers or employees acting as part of their official duties; on a worldwide, perpetual, irrevocable, royalty-free basis to BMJ Publishing Group Ltd ("BMJ") its licensees and where the relevant Journal is co-owned by BMJ to the co-owners of the Journal, to publish the Work in this journal and any other BMJ products and to exploit all rights, as set out in our [licence](#).

The Submitting Author accepts and understands that any supply made under these terms is made by BMJ to the Submitting Author unless you are acting as an employee on behalf of your employer or a postgraduate student of an affiliated institution which is paying any applicable article publishing charge ("APC") for Open Access articles. Where the Submitting Author wishes to make the Work available on an Open Access basis (and intends to pay the relevant APC), the terms of reuse of such Open Access shall be governed by a Creative Commons licence – details of these licences and which [Creative Commons](#) licence will apply to this Work are set out in our licence referred to above.

Other than as permitted in any relevant BMJ Author's Self Archiving Policies, I confirm this Work has not been accepted for publication elsewhere, is not being considered for publication elsewhere and does not duplicate material already published. I confirm all authors consent to publication of this Work and authorise the granting of this licence.

Final version

1  
2  
3 Longitudinal cohort study of the impact of specialist cancer services for teenagers and young  
4 adults on quality of life: outcomes from the BRIGHTLIGHT study  
5  
6  
7

8 Rachel M Taylor PhD, Lorna A Fern PhD, Julie A Barber PhD, Javier Alvarez-Galvez PhD,  
9 Richard G Feltbower PhD, Sarah Lea PhD, Ana Martins PhD, Stephen Morris PhD, Louise  
10 Hooker MSc, Faith Gibson PhD, Rosalind Raine PhD, <sup>11</sup>Dan P Stark MD, <sup>2</sup>Jeremy S Whelan  
11 MD  
12  
13

14  
15 Rachel Taylor, Director of the CNMAR, Centre for Nurse, Midwife and AHP Led Research  
16 (CNMAR), University College London Hospitals NHS Foundation Trust, London NW1 2PG  
17  
18

19 Lorna Fern, Researcher, Cancer Division, University College London Hospitals NHS  
20 Foundation Trust, London NW1 2PG  
21  
22

23 Julie Barber, Associate Professor in Medical Statistics, Department of Statistical Science,  
24 University College, London WC1E 6BT  
25

26 Javier Alvarez-Galvez, Research Fellow, Department of Biomedicine, Biotechnology and  
27 Public Health, University of Cadiz, Avda. Ana de Viya, 52, 11009 Cádiz, Spain  
28  
29

30 Richard Feltbower, Senior Lecturer in Epidemiology, School of Medicine, University of  
31 Leeds, Leeds, LS2 9JT.  
32

33 Sarah Lea, Research Facilitator, Cancer Division, University College London Hospitals NHS  
34 Foundation Trust, London NW1 2PG  
35  
36

37 Ana Martins, Research Associate, Cancer Division, University College London Hospitals  
38 NHS Foundation Trust, London NW1 2PG  
39  
40

41 Steve Morris, Professor of Health Economics, Primary Care Unit, Department of Public  
42 Health and Primary Care, University of Cambridge, United Kingdom  
43  
44

45 Louise Hooker, teenage Cancer Trust Lead Nurse, Wessex Teenage and Young Adult  
46 Cancer Service, University Hospital Southampton, Southampton, SO16 5YA  
47

48 Faith Gibson, Professor of Child Health and Cancer Care, School of Health Sciences,  
49 Faculty of Health and Medical Sciences, University of Surrey, Guildford, Surrey GU2 7XH  
50 and Centre for Outcomes and Experience Research in Children's Health, Illness and  
51 Disability (ORCHID), Great Ormond Street Hospital for Children NHS Foundation Trust,  
52 London WCIN3JH  
53  
54

55 Rosalind Raine, Professor of Health Services research, Department of Applied Health  
56 Research, Director, NIHR CLAHRC North Thames, NIHR Senior Investigator, University  
57 College London, London WC1E 7HB  
58  
59  
60



Final version

1  
2  
3 Dan Stark, Professor of Teenage and Young Adult Cancer Research and Consultant  
4 Medical Oncologist, Leeds Institute of Medical Research at St James's, Leeds LS9 7TF  
5

6  
7 Jeremy Whelan, Professor of Cancer Medicine, Cancer Division, University College London  
8 Hospitals NHS Foundation Trust, London NW1 2PG  
9

10 Correspondence: Dr Lorna Fern, lorna.fern@nhs.net  
11

12  
13 Keywords: BRIGHTLIGHT, teenagers and young adults, cancer, observational research,  
14 cohort, outcome, quality of life, experience  
15

16 Abstract = 300/300

17 Word count = 4,088

18 Number of Tables = 3

19 Number of Figures = 8  
20  
21  
22

## 23 ABSTRACT

24  
25  
26 *Objectives:* In England, healthcare policy advocates specialised age-appropriate services for  
27 teenagers and young adults (TYA), those aged 13-24 years at diagnosis. Specialist Principal  
28 Treatment Centres (PTC) provide enhanced TYA age-specific care, although many still  
29 receive care in adult or children's cancer services. We present the first prospective  
30 structured analysis of quality of life (QOL) associated with the amount of care received in a  
31 TYA-PTC  
32  
33

34  
35 *Design:* Longitudinal cohort study  
36

37 *Setting:* Hospitals delivering in-patient cancer care in England  
38

39 *Participants:* 1,114 young people aged 13-24 years newly diagnosed with cancer  
40  
41

42 *Intervention:* Exposure to the TYA-PTC defined as patients receiving NO-TYA-PTC care with  
43 those receiving ALL-TYA-PTC and SOME-TYA-PTC care.  
44

45 *Primary outcome:* quality of life measured at five time points: 6,12,18, 24 and 36-months  
46 after diagnosis  
47  
48

49 *Results:* Group mean total QOL improved over time for all patients, but for those receiving  
50 NO-TYA-PTC was an average of 5.6 points higher (95% CI 2.8-8.5) than in young people  
51 receiving SOME-TYA-PTC care, and 4.2 points higher (95% CI 1.1-7.3) compared to ALL-  
52 TYA-PTC care. Differences were greatest 6 months after diagnosis, reduced over time, and  
53 did not meet the 8-point level that is proposed to be clinically significant. Young people  
54 receiving NO-TYA-PTC care were more likely to have been offered a choice of place of care,  
55 be older, from more deprived areas, in work, and have less severe disease. However,  
56 analyses adjusting for confounding factors did not explain the differences between TYA  
57 groups.  
58  
59  
60

Final version

1  
2  
3  
4 *Conclusions:* Receipt of some or all care in a TYA-PTC was associated with lower QOL  
5 shortly after cancer diagnosis. The NO-TYA-PTC group had higher QOL three years after  
6 diagnosis, however those receiving all or some care in a TYA-PTC experienced more rapid  
7 QOL improvements. Despite this, the difference were small and may not be clinically  
8 significant. Receipt of some care in a TYA-PTC requires further study.  
9  
10

### 11 **Strengths & limitations of this study**

12 5 bullet points

- 13 • We present the first national evaluation of a model of care which aims to improve  
14 outcomes for teenagers and young adults with cancer.
- 15 • We were able to quantify where young people received care through nationally  
16 collated hospital activity data so we could objectively assign young people to a group  
17 representing the model of care received.
- 18 • Analysis of longitudinal data for three years after diagnosis was adjusted for multiple  
19 confounding variables, identified from a conceptual model of patient experience,  
20 which underpinned data collection in the study.
- 21 • The measure quantifying where care was received was based on the assumption  
22 that all teenage and young adult Principal Treatment Centres provided equivalent  
23 facilities and care.
- 24 • The cohort comprises 20% of young people diagnosed with cancer during the time  
25 period, which could impact on the generalisability of the results.  
26  
27  
28  
29  
30  
31

## 32 **INTRODUCTION**

33  
34  
35 Cancer in teenagers and young adults (TYA) is uncommon. Despite this, cancer in young  
36 people aged 15-29 years at diagnosis accounts for an estimated 350,000 new incidence  
37 cases and incidence rates are rising[1]. Lower survival rates than younger children in several  
38 common cancer types[2] have fuelled many international initiatives aimed to improve  
39 outcomes and wellbeing[3,4]. In particular, the need for specialist age-appropriate care and  
40 environments are advocated as a critical component of good cancer care for TYA[5-9].  
41 However, the effect on clinical and patient-reported outcomes associated with age-  
42 appropriate care are yet to be described[10].  
43  
44

45  
46 Distinct cancer service provision for TYA began in the United Kingdom (UK) in the  
47 1990s[11]. This was initiated by clinician and patient advocacy, promoting principles which  
48 responded to young people's reports of care that frequently lacked support for their priorities  
49 of progress towards normal life goals and care alongside others of a similar age delivered by  
50 professionals who understood young people[12]. Specialised UK National Health Services  
51 (NHS) for young people with cancer have been mandated in England since 2005 by National  
52 Institute for Health and Clinical Excellence (NICE) guidance[3]. The guidance identified that  
53 young people's needs may be poorly met in children's and older adult services working in  
54 isolation from each other[4], and that TYA-specific places of treatment and care may be key  
55 to achieving better outcomes for young people with cancer[9] due in part to the distinct  
56 impact of cancer on young people's wellbeing, such as in the physical, psychosocial and  
57 developmental domains[13].  
58  
59  
60

Final version

## The delivery of cancer care for TYA in England

Healthcare in England is in the main, publicly funded through the NHS providing universal comprehensive healthcare to all citizens. “The service is configured to improve, prevent, diagnose and treat physical and mental health problems with equal regard”[14]. Secondary care, thus cancer care is delivered in NHS Trusts which oversee NHS hospitals and specialist care centres serving a geographical catchment area[15]. A Trust may comprise of one or several hospitals, each providing different or similar services, depending on local need. A Trust may comprise of one or several hospitals, each providing different or similar services, depending on local need[15].

The model of specialised TYA cancer care implemented from 2005 focused on 13 TYA Principal Treatment Centres (TYA-PTC) in England. This was to complement the existing services delivered in children’s cancer units (aged up to 16 years in the main but local variation would accept older teenagers) and adult cancer services from 18 years onward. The TYA-PTCs were funded to deliver specialist care, which included the same standard of cancer care as the children and adult units but care was enhanced by the addition of age-appropriate environments and multi-disciplinary teams experienced in working with TYA. For example, providing education and career support to enable TYA to continue with education and employment at a critical time in their lives; nurse specialists who were skilled at discussing challenging subjects (sex, fertility, drug and alcohol use); space to interact with other TYA with cancer to promote normal development and youth support coordinators who provide youth support and facilitate peer to peer activities(see Morgan et al[7] for examples of what is included in a TYA unit).

The location of the TYA-PTCs were chosen based on a number of factors, including existing established service, geographical location and other cancer services available. The guidance directed that TYA aged 16-18 years were treated in a TYA-PTC. The model for young adults aged 19-24 years was to offer choice to receive care in a TYA-PTC or a local cancer unit if it were designated as able to provide their cancer treatment and at least some aspects of age-appropriate care. There was variation in the lower age of admission in TYA-PTCs based on history and availability of other services locally so this resulted in TYA aged 13-16 being treated in a children’s cancer unit or TYA-PTC and those aged 17-24 could be admitted to a TYA-PTC or adult cancer unit. By 2010, about two-thirds of those aged 15-18 years and one-third of 19-24-year olds were believed to have contact with a TYA-PTC[16]. Place of care was therefore directed by clinicians based on cancer type and geographical location. While there is an international mobilisation to implement specialist TYA services[12], including in other European countries, Australasia and North America, the impact of such services on clinical outcomes has not been robustly evaluated.

The BRIGHTLIGHT study is a prospective evaluation of the benefits of specialist TYA services in the English NHS. In order to capture the complexity of the delivery of TYA cancer care, it comprised an evaluation from the perspective of the environment of care [17], the workforce delivering care [18] and young people receiving care. BRIGHTLIGHT was developed with extensive input from young people as well as health professionals [6, 9, 19] and based on consultation with young people[20]. This included input into the selection of the primary outcome: quality of life (QOL).

Final version

1  
2  
3  
4  
5  
6  
7  
8  
9  
10  
11  
12  
13  
14  
15  
16  
17  
18  
19  
20  
21  
22  
23  
24  
25  
26  
27  
28  
29  
30  
31  
32  
33  
34  
35  
36  
37  
38  
39  
40  
41  
42  
43  
44  
45  
46  
47  
48  
49  
50  
51  
52  
53  
54  
55  
56  
57  
58  
59  
60

Quality of Life is defined as "...subjective, multidimensional and dynamic. It is unique to each individual and includes aspects of physical, psychological and social function. It is dependent not only upon the stage of development but also the illness trajectory. This involves the achievement of goals and aspirations and the constraints imposed through ill health and treatment"[21]. Measurement of QOL uses the patient's own report to evaluate the spectrum of impact of illness upon them and has become an increasingly valued healthcare outcome. Previous reports of young people's QOL after a cancer diagnosis have shown this to be significantly lower than normative population data[22]. Longitudinal assessment has indicated QOL improved in the first year after diagnosis but there was no significant improvement in the second year [23]. No evaluation beyond the second year has been reported and while studies have investigated predictors of QOL there has been no evaluation of the impact of different models of delivery of care on QOL. We examined QOL at 6, 12, 18, 24 and 36 months after diagnosis in relation to the proportion of care young people received in a TYA-PTC

## METHODS

### Study design

The BRIGHTLIGHT study is a mixed methods programme of research. Results from an embedded longitudinal cohort study, obtaining data from young people through a bespoke survey[24], are reported here. The survey was administered at five time points during the first three years after diagnosis (6, 12, 18, 24 and 36 months, waves 1-5 respectively). A scale was developed, previously described in detail[25], using Hospital Episode Statistics (HES) in-patient data to measure episodes of care in different NHS Trusts and then used to assign young people to one of three levels of TYA care dependent on how much in-patient HES activity recorded in the first 12 months after diagnosis was delivered in a TYA-PTC: no care in a TYA-PTC, i.e., all care was delivered in a children's or adult cancer unit (NO-TYA-PTC), some care delivered in a TYA-PTC with additional care in a children's or adult cancer unit (SOME-TYA-PTC) or all care delivered in a TYA-PTC (ALL-TYA-PTC).

### Patient and public involvement

BRIGHTLIGHT has been developed with young people from the point of inception and our Young Advisory Panel (YAP) have been involved in the management, implementation and dissemination of the study. This has been reported in detail previously [20, 26-29] but in summary, BRIGHTLIGHT was developed based on consultation with young people attending a patient conference in 2008: place of care was identified as the third priority for future research. Young people worked with the research team to conduct the research informing the National Institute for Health Research grant application[6] including representation as a co-applicant. The YAP have advised on changes to recruitment[28], helped develop the retention strategy[26], informed additional studies[29], and are involved in dissemination[30].

### Participants and setting

BRIGHTLIGHT was open to recruitment between October 2012 and April 2015 in 109 English NHS hospitals of which 97 recruited at least one young person. Eligibility was defined as aged 13-24 years at the time of diagnosis, newly diagnosed with cancer (ICD-10

Final version

1  
2  
3 codes C00-C97) and recruited within four months of diagnosis. There was no eligibility  
4 exclusion for a language or sensory impairment affecting communication. The following  
5 groups were excluded: those serving a custodial sentence; not anticipated to be alive at the  
6 first point of data collection (6-months after diagnosis); or incapable of completing a survey.  
7 Details of the recruitment process are reported elsewhere[25,31]. Young people gave  
8 written consent and parental consent was also obtained for those less than 16 years.  
9 Checks were made through the Demographic Batch Service at NHS digital before each  
10 wave of data collection to ensure young people were alive and to obtain their most recent  
11 address. The study was approved by London-Bloomsbury NHS Research Ethics Committee  
12 and the Confidentiality Advisory Group of the Health Research Authority.  
13  
14  
15

16 The sample size calculation was based on a comparison between the three levels of TYA  
17 care[25] for the primary outcome of PedsQL total score[32], measured at five time points  
18 over the three-year follow-up. Previously reported PedsQL data for childhood cancer  
19 patients suggested a standard deviation for this score of 16[33]. To detect a difference in  
20 scores of 8 units with 80% power[34] required a sample of 200 young people. This  
21 calculation assumed a significance level of 0.01 (2 sided) to allow for multiple comparisons  
22 between three levels of TYA care and assumed an average of three repeated  
23 measurements per patient (intra cluster correlation 0.3 as suggested as a maximum for  
24 similar patient outcomes[35]). The calculation allowed for adjustment for confounding factors  
25 using a variance inflation factor with a correlation of 0.5[36]. To ensure adequate power to  
26 examine the effect of TYA care on QOL within subgroups of age at diagnosis (13-18 and 19-  
27 24 years) and type of tumour (haematological, solid tumour groups), the minimum required  
28 sample size was raised to 800 (80% power).  
29  
30  
31  
32

### 33 **Data collection**

34 Data were collected from three sources: young people's self-report, patient clinical records,  
35 and NHS and Public Health England (PHE) databases. Details of these data sources are  
36 reported elsewhere[25]. Data presented here are responses to the BRIGHTLIGHT Survey, a  
37 bespoke survey containing five validated questionnaires and 169 descriptive questions  
38 related to post diagnosis experience. The survey was administered through face-to-face  
39 interviews in young people's homes by an independent research company at the first time  
40 point and either online or telephone interview at subsequent waves of data collection[24].  
41  
42  
43

44 This paper reports data for the primary outcome, QOL, which was measured using the  
45 Pediatric Quality of Life Questionnaire (PedsQL)[32]. At the time of study development this  
46 was the only measure of QOL validated for teenagers and young adults[37]. It contains 23  
47 items rated using a five-point Likert Scale (Never, Almost never, Sometimes, Often, Almost  
48 always). Responses are presented as four domain scores (physical, emotional, social, and  
49 work/studies functioning), two summary scores (physical and psychosocial function) and a  
50 total score. Domain, summary and total scores range from 0-100, with 100 representing the  
51 best possible QOL.  
52  
53

### 54 **Analysis**

55 Analysis was carried out following a predefined statistical analysis plan using STATA version  
56 15. A mixed effects model was used to investigate the relationship between the levels of  
57 TYA care and the PedsQL total score, allowing for repeated measurements taken over the 3  
58 years since diagnosis. The model was adjusted for confounding factors identified based on  
59  
60

Final version

1  
2  
3 the conceptual model underpinning the BRIGHTLIGHT Survey[6,24] and using a causal  
4 diagram in the form of a Directed Acyclic Graph (DAG) (DAGitty software [www.dagitty.net](http://www.dagitty.net);  
5 Supplemental File, Figure A1). Factors adjusted for were age at diagnosis, type of cancer  
6 (leukaemia, lymphoma, brain and central nervous system, bone tumours, sarcoma, germ  
7 cell, melanoma, carcinomas, other), socioeconomic status (Index of Multiple Deprivation  
8 (IMD)[38] quintile), severity of cancer (least, intermediate, most[25]), ethnicity (white, other),  
9 choice offered about where to receive treatment (yes/no), presence of any long term  
10 condition prior to cancer (yes/no), days from first symptom to diagnosis and number of  
11 General Practitioner visits before diagnosis. Geographical location (specified as 12 cities,  
12 derived from the TYA-PTC and their network of hospitals) was included in the model as a  
13 random effect. Models were extended to include interaction terms to investigate predefined  
14 subgroup effects by age at diagnosis (both as a continuous factor and using categories of  
15 13-18 and 19-24 years) and tumour type (haematological and solid tumours). An interaction  
16 with time since diagnosis was also examined to investigate whether the relationship between  
17 level of TYA care and QOL changed over time. Similar models were fitted for the PedsQL  
18 domain scores for physical, social, emotional and work/school/college functioning, and the  
19 psychosocial summary score.  
20  
21  
22  
23  
24

25 The extent and patterns of missing QOL data over time were examined using summary  
26 statistics and profile plots. As there is no provision in the scoring of PedsQL to directly  
27 account for death, our main analysis did not distinguish between data 'missing' following  
28 death and that missing for other reasons. With the possibility of informative missing data due  
29 to deaths, a sensitivity analysis was carried where joint mixed-effect models for the  
30 longitudinal QOL scores and time until death were fitted to account for the correlation  
31 between the QOL and survival outcomes[39]. The QOL estimates for the effect of level of  
32 TYA care were then compared with those obtained from previously fitted mixed models.  
33  
34  
35

## 36 RESULTS

37  
38 A total of 1,126 young people were recruited. BRIGHTLIGHT survey data at wave 1 were  
39 available for 830 (75%) participants and details of numbers at each wave are summarised in  
40 Figure 1. Characteristics of those who did and did not complete wave 1 were similar, except  
41 for a higher proportion of non-white participants not completing wave 1 (12% vs. 19%,  
42  $p=.004$ ) [25]. Forty-eight participants could not be assigned a level of TYA-PTC care as  
43 there were no linked HES inpatient records available. Data from 782 young people were  
44 therefore included. There were fewer young people receiving ALL-TYA-PTC care ( $n=193$ ;  
45 25%) in comparison to SOME-TYA-PTC ( $n=312$ ; 40%) and NO-TYA-PTC ( $n=277$ ; 35%).  
46 Demographic characteristics and summary of variables adjusted for in the analysis are  
47 shown in Table 1. Young people who received NO-TYA-PTC care were slightly older, more  
48 likely to be working full/part time, had less severe disease, had a better prognosis and were  
49 more likely to have been given a choice in their place of care. Young people who had ALL-  
50 TYA-PTC care were more likely to come from less deprived areas.  
51  
52  
53  
54  
55  
56  
57  
58  
59  
60

Final version

Table 1: Participant characteristics according to level of care at wave 1

| Characteristic                                 |                               | Level of TYA care at 12 months from diagnosis |                       |                      |
|------------------------------------------------|-------------------------------|-----------------------------------------------|-----------------------|----------------------|
|                                                |                               | NO-TYA-PTC<br>N=277                           | SOME-TYA-PTC<br>N=312 | ALL-TYA-PTC<br>N=193 |
| <b>Age at diagnosis (years)</b>                | Mean (SD)                     | 21.04 (3.01)                                  | 19.40 (3.41)          | 19.97 (3.15)         |
| <b>Age groups</b>                              | 13-15 years                   | 37 (10%)                                      | 72 (17%)              | 40 (15%)             |
|                                                | 16-18 years                   | 34 (10%)                                      | 128 (31%)             | 78 (29%)             |
|                                                | 19-24 years                   | 288 (80%)                                     | 215 (52%)             | 152 (56%)            |
| <b>Gender</b>                                  | Male                          | 148 (53%)                                     | 165 (53%)             | 112 (58%)            |
|                                                | Female                        | 129 (47%)                                     | 147 (47%)             | 81 (42%)             |
| <b>Ethnicity*</b>                              | White                         | 252 (91%)                                     | 273 (88%)             | 163 (84%)            |
|                                                | Mixed                         | 4 (1%)                                        | 5 (2%)                | 4 (2%)               |
|                                                | Asian                         | 15 (5%)                                       | 24 (8%)               | 20 (10%)             |
|                                                | Black                         | 4 (1%)                                        | 7 (2%)                | 2 (1%)               |
|                                                | Other                         | 2 (1%)                                        | 3 (1%)                | 4 (2%)               |
| <b>Socioeconomic status<br/>(IMD quintile)</b> | 1 – most deprived             | 66 (24%)                                      | 73 (24%)              | 34 (18%)             |
|                                                | 2                             | 47 (17%)                                      | 52 (17%)              | 32 (17%)             |
|                                                | 3                             | 51 (19%)                                      | 60 (20%)              | 37 (20%)             |
|                                                | 4                             | 65 (24%)                                      | 61 (20%)              | 40 (21%)             |
|                                                | 5 – least deprived            | 46 (17%)                                      | 59 (19%)              | 46 (24%)             |
| <b>Marital Status</b>                          | Married/civil partnership     | 9 (4%)                                        | 8 (3%)                | 6 (3%)               |
|                                                | Cohabiting                    | 43 (17%)                                      | 27 (10%)              | 18 (10%)             |
|                                                | Single/divorced               | 198 (79%)                                     | 227 (87%)             | 148 (86%)            |
| <b>Current status</b>                          | Working full/part time        | 126 (45%)                                     | 72 (23%)              | 43 (22%)             |
|                                                | In education                  | 61 (22%)                                      | 112 (36%)             | 81 (42%)             |
|                                                | Other work                    | 6 (2%)                                        | 5 (2%)                | 6 (3%)               |
|                                                | (apprentice/intern/voluntary) |                                               |                       |                      |

Final version

|                                                |                           |                |                |               |
|------------------------------------------------|---------------------------|----------------|----------------|---------------|
|                                                | Unemployed                | 10 (4%)        | 11 (4%)        | 7 (4%)        |
|                                                | Long term sick            | 39 (14%)       | 51 (16%)       | 31 (16%)      |
|                                                | Not seeking work          | 35 (13%)       | 61 (20%)       | 25 (13%)      |
| <b>Type of cancer (Birch classification)</b>   | Leukaemia                 | 19 (7%)        | 49 (16%)       | 33 (17%)      |
|                                                | Lymphoma                  | 111 (40%)      | 75 (24%)       | 70 (36%)      |
|                                                | CNS                       | 9 (3%)         | 9 (3%)         | 12 (6%)       |
|                                                | Bone                      | 7 (3%)         | 59 (19%)       | 3 (2%)        |
|                                                | Sarcomas                  | 8 (3%)         | 31 (10%)       | 15 (8%)       |
|                                                | Germ cell                 | 64 (19%)       | 55 (18%)       | 31 (16%)      |
|                                                | Skin                      | 22 (8%)        | 1 (<1%)        | 4 (2%)        |
|                                                | Carcinomas (not skin)     | 41 (15%)       | 31 (10%)       | 23 (12%)      |
|                                                | Miscellaneous specified** | 5 (2%)         | 2 (<1%)        | 1 (<1%)       |
|                                                | Unspecified Malignant     | 1 (<1%)        | 0              | 1 (<1%)       |
| <b>Severity at diagnosis (row %, column %)</b> | Least                     | 200 (46%, 72%) | 133 (31%, 43%) | 95 (22%, 49%) |
|                                                | Intermediate              | 49 (26%, 18%)  | 82 (44%, 26%)  | 56 (30%, 29%) |
|                                                | Most                      | 28 (17%, 10%)  | 97 (58%, 31%)  | 42 (25%, 22%) |
| <b>Prognostic score</b>                        | <50%                      | 21 (8%)        | 60 (19%)       | 41 (21%)      |
|                                                | 50-80%                    | 54 (20%)       | 125 (40%)      | 44 (23%)      |
|                                                | >80%                      | 200 (73%)      | 126 (41%)      | 108 (56%)     |
| <b>Location***</b>                             | Birmingham                | 41 (15%)       | 59 (19%)       | 12 (6%)       |
|                                                | Bristol                   | 51 (18%)       | 32 (10%)       | 4 (2%)        |
|                                                | Cambridge                 | 12 (4%)        | 8 (3%)         | 1 (1%)        |
|                                                | Manchester                | 22 (8%)        | 35 (11%)       | 11 (6%)       |
|                                                | Merseyside                | 13 (5%)        | 11 (4%)        | 6 (3%)        |
|                                                | East Midlands             | 15 (5%)        | 24 (8%)        | 60 (31%)      |
|                                                | Leeds                     | 20 (7%)        | 25 (8%)        | 25 (13%)      |
|                                                | Newcastle                 | 13 (5%)        | 6 (2%)         | 24 (12%)      |
|                                                | Oxford                    | 5 (2%)         | 4 (1%)         | 7 (4%)        |



Final version

|                                                                    |                          |                                          |                                           |                                            |
|--------------------------------------------------------------------|--------------------------|------------------------------------------|-------------------------------------------|--------------------------------------------|
|                                                                    | London                   | 60 (22%)                                 | 83 (27%)                                  | 10 (5%)                                    |
|                                                                    | Sheffield                | 7 (3%)                                   | 9 (3%)                                    | 9 (5%)                                     |
|                                                                    | Southampton              | 18 (7%)                                  | 16 (5%)                                   | 24 (12%)                                   |
| <b>Given a choice about where to receive treatment<sup>§</sup></b> | Yes                      | N=272<br>121 (45%)                       | N=311<br>86 (28%)                         | N=192<br>48 (25%)                          |
|                                                                    | No (or < 19 years)       | 151 (56%)                                | 225 (72%)                                 | 144 (75%)                                  |
| <b>Long term condition prior to cancer</b>                         | Yes                      | N=277<br>20 (7%)                         | N=311<br>34 (11%)                         | N=193<br>18 (9%)                           |
|                                                                    | No                       | 257 (93%)                                | 277 (89%)                                 | 175 (91%)                                  |
| <b>Time to diagnosis: days from 1<sup>st</sup> symptom</b>         | Median (IQR), [min, max] | N=264<br>62 (29.5 to 168.5)<br>[0, 1340] | N=304<br>65.5 (29.5 to 152.5)<br>[0, 959] | N=188<br>63.5 (25.5 to 151.0)<br>[0, 1217] |
| <b>Time to diagnosis: number of GP visits before diagnosis</b>     | Median (IQR), [min, max] | N=274<br>1 (0 to 3)<br>[0, 20]           | N=311<br>1 (0 to 3)<br>[0, 20]            | N=193<br>2 (1 to 3)<br>[0, 40]             |

\* Wave 1 data was used with missing values completed using available PHE data.

\*\* includes 4 'unclassified' – treated in cancer unit but did not have cancer

\*\*\*Includes the TYA-PTC and hospitals linked to the multi-disciplinary team at the TYA-PTC; where available based on hospital of diagnosis, for 77 cases based on recruiting hospital

§ Those <19 years at diagnosis were assumed not to have been given a choice

Final version

Longitudinal changes in the average QOL total score according to the level of care are shown in Figure 2 (summary by wave is given in Supplemental file, Table A1). Across all time periods this illustrates lower QOL score for those in the SOME and ALL-TYA-PTC groups compared to the NO-TYA-PTC group. Differences between level of care appeared to diminish steadily over time. The negative coefficients for levels of care from the model indicate that across the 3 year period of the study QOL scores were on average higher for those with NO-TYA-PTC care compared with SOME-TYA-PTC and ALL-TYA-PTC with a larger difference compared with the SOME-TYA-PTC category (Table 2). The differences were statistically significant but fell inside the threshold of 8 points proposed to be clinically significant [32]. There was no evidence that the relationship between QOL and level of care was different for the combined group of leukaemia/lymphomas compared with other cancers. Also, there was no evidence of a difference by age at diagnosis (Figure 3). There was evidence that the QOL/Level of care relationship changed over time such that differences between the groups diminished i.e. slopes for SOME-TYA-PTC and ALL-TYA-PTC over time are steeper than for NO-TYA-PTC, therefore rates of improvement of QOL were superior in the ALL-TYA-PTC and SOME-TYA-PTC (Table 3), mirroring what was seen in Figure 2.

Analysis of the physical functioning and work/school/college functioning domain scores showed a similar pattern to that seen for the total QOL score. The SOME-TYA-PTC group had a mean difference in physical functioning of -8.28 compared to the NO\_TYA-PTC group, which was statistically significant and above the threshold for clinical significance. For the emotional functioning domain however, difference between groups were less marked and notably the average difference in scores between the SOME-TYA-PTC and NO-TYA-PTC was reduced. Difference between groups in terms of social functioning and the psychosocial summary scores were small and not statistically significant (Figures 4-8, Table 2).

Table 2: Mixed model investigating the relationship between levels of TYA care received during the first 12 months from diagnosis and total quality of life and domain scores over 3 years (N=733)

|                                                |                     | Difference in means | 95% Confidence Interval | P-value  |
|------------------------------------------------|---------------------|---------------------|-------------------------|----------|
| <b>TOTAL QUALITY OF LIFE SCORE (n=733)</b>     |                     |                     |                         |          |
| <b>TYA care category (v NO-TYA-PTC)</b>        | SOME-TYA-PTC        | -5.63               | -8.49 to -2.77          | P=0.0005 |
|                                                | ALL-TYA-PTC         | -4.17               | -7.28 to -1.07          |          |
| <b>PHYSICAL FUNCTIONING (N=733)</b>            |                     |                     |                         |          |
| <b>TYA care category (v NO-TYA-PTC)</b>        | <b>SOME-TYA-PTC</b> | -8.28               | -11.95 to -4.61         | P=0.0001 |
|                                                | <b>ALL-TYA-PTC</b>  | -4.79               | -8.76 to -0.81          |          |
| <b>EMOTIONAL FUNCTIONING (N=733)</b>           |                     |                     |                         |          |
| <b>TYA care category (v NO-TYA-PTC)</b>        | <b>SOME-TYA-PTC</b> | -4.29               | -7.79 to -0.80          | P=0.015  |
|                                                | <b>ALL-TYA-PTC</b>  | -5.43               | -9.29 to -1.57          |          |
| <b>SOCIAL FUNCTIONING (N=733)</b>              |                     |                     |                         |          |
| <b>TYA care category (v NO-TYA-PTC)</b>        | <b>SOME-TYA-PTC</b> | -2.96               | -5.77 to -0.16          | P=0.099  |
|                                                | <b>ALL-TYA-PTC</b>  | -2.49               | -5.60 to 0.62           |          |
| <b>WORK/SCHOOL/COLLEGE FUNCTIONING (N=595)</b> |                     |                     |                         |          |
| <b>TYA care category (v NO-TYA-PTC)</b>        | <b>SOME-TYA-PTC</b> | -6.87               | -10.45 to -3.30         | P=0.0007 |
|                                                | <b>ALL-TYA-PTC</b>  | -4.67               | -8.47 to -0.87          |          |
| <b>PSYCHOSOCIAL SUMMARY SCORE (N=600)</b>      |                     |                     |                         |          |
| <b>TYA care category</b>                       | <b>SOME-TYA-PTC</b> | -2.51               | -5.71 to 0.70           | P=0.074  |

Final version

|                |             |       |                |  |
|----------------|-------------|-------|----------------|--|
| (v NO-TYA-PTC) | ALL-TYA-PTC | -3.96 | -7.44 to -0.48 |  |
|----------------|-------------|-------|----------------|--|

\* results from a three level model for repeated measurements of QOL over time since diagnosis, with a random effect for geography and adjustment for time since diagnosis, age at diagnosis, type of cancer, socioeconomic status, severity of cancer, ethnicity, choice about where to receive treatment, long-term condition prior to cancer, days from 1<sup>st</sup> symptom to diagnosis, number of GP visits before diagnosis. Missing data for 96 due to missing TYA category and missing data in other covariates

\*\* Likelihood ratio test

Table 3: Investigation of changes in QOL score over time: Results from adjusted\* mixed effects models with interaction term (time months x TYA-PTC category). Coefficients for time describe the linear increase in QOL score per month within each TYA care category (N=733)

| TYA care category | Coefficient for time (per month) | 95% confidence interval | P-value from interaction |
|-------------------|----------------------------------|-------------------------|--------------------------|
| NO-TYA-PTC        | 0.26                             | 0.18 to 0.34            | 0.004                    |
| SOME-TYA-PTC      | 0.45                             | 0.37 to 0.53            |                          |
| ALL-TYA-PTC       | 0.37                             | 0.27 to 0.46            |                          |

\* model with a random effect for city and adjustment for time since diagnosis, age at diagnosis, type of cancer, socioeconomic status, severity of cancer, ethnicity, choice about where to receive treatment, long-term condition prior to cancer, days from 1st symptom to diagnosis, number of GP visits before diagnosis.

Results from post hoc analysis excluding patients with bone tumours were similar to those for all cancers combined (Supplemental file, Table A2). A subgroup investigation of patients with lymphoma, the biggest diagnostic category, showed these were not significantly different from those for the group of other cancer types (Supplemental file, Table A3). Finally, sensitivity analyses using joint modelling for survival alongside longitudinal QOL did not alter the conclusion based on the main results (Supplemental file, Table A4).

## DISCUSSION

Our study is the first reported national longitudinal evaluation of specialist cancer services, more specifically TYA-PTCs and their networks of care, as they were originally defined in 2005[3]. We recorded patient outcomes to determine the influence of place of care, and after consultation with patients and professionals, selected QOL as the primary parameter of interest. Using routinely collected hospital admission data to identify time spent in the TYA-PTC, we categorised patients by the level of their care received in the TYA-PTC (all, none or some). We found that there was a statistically significant difference between these groups with those in the NO-TYA-PTC group having superior QOL compared to those in the ALL-TYA-PTC group, whilst those in the SOME-TYA-PTC group reported lowest QOL. Quality of life improved over time in all three groups, but rates of improvement were significantly better for SOME and ALL-TYA-PTC.

We predicted that sociodemographic or disease factors might explain some of the differences between groups and adjusted the analyses for these confounding variables. Despite extensive analysis we were unable to identify other factors to account for these differences. Like other reports of young people's QOL after a cancer diagnosis[22], we found this to be low, irrespective of where young people were treated. We found that young people who did not access a TYA-PTC had better QOL in comparison to those who had all or some of their care in a TYA-PTC. However, while this was statistically significant, the mean

Final version

1  
2  
3 difference between the NO-TYA-PTC and ALL-TYA-PTC groups was not at a level proposed  
4 as clinically significant (8-point difference[33]). Nevertheless, it is important to consider  
5 reasons for lower QOL when young people experience multiple types of place of care and  
6 the determinants of place of care. Based on work in other settings where care is delivered  
7 on multiple sites [40] we surmise that this may result from limited coordination of care,  
8 perhaps including inadequate communication with and between professionals. Having to  
9 repeat conversations and explanations of their cancer diagnosis and treatment details is  
10 frequently reported as burdensome to young people[6]. A greater understanding of the  
11 determinants of place of care for young people and the factors which influence a sense of  
12 care co-ordination deserve further exploration.  
13  
14  
15

16 It is interesting that young people who had no access to the TYA-PTC rated their QOL the  
17 highest. This could reflect young people rating themselves by comparison with the other  
18 people they could see being treated for cancer outside of a TYA-PTC, including older adults.  
19 It could also be that young people chose to receive care locally rather than travel to the TYA-  
20 PTC so they could keep their links to their 'normal' life, which is supported by the domain  
21 level analysis where they also rated their work/school/college functioning higher.  
22 Alternatively, the strong emphasis placed on the unique issues faced by TYA with cancer by  
23 members of the TYA MDT staff may have heightened patients' awareness of these problems  
24 in comparison to the NO-TYA-PTC group, and consequently they lowered their perception of  
25 their QOL while the NO-TYA-PTC group remained comparatively unaware of such concerns.  
26 Future work could focus on the influence of being given a choice in the place where young  
27 people receive care, and the factors that young people consider to be important when  
28 making this decision.  
29  
30  
31  
32

33 The longest follow-up for longitudinal assessment of QOL previously reported to two years  
34 after diagnosis[23], which showed no improvement after the first year. However, we found  
35 that there was a gradual improvement in QOL over 3-years, which was more rapid when  
36 young people received all their care in a TYA-PTC. The philosophy of TYA cancer care  
37 includes the delivery of care to support young people to achieve their long-term personal  
38 outcomes (education, employment and relationships), the benefits of care provided by the  
39 TYA-PTC may therefore not be realised in the short-term. It would be beneficial for us to  
40 understand whether this improvement continued into long-term survivorship, especially the  
41 influence of QOL reaching and sustaining goals such as employment.  
42  
43  
44

45 There are several limitations to this study including how specialist care was defined and  
46 measured. This was based on the location of the 13 NHS Trusts in England commissioned  
47 as TYA-PTCs but not the specific hospitals within these Trusts where the specialist TYA  
48 services were based. For example, a Trust which included multiple hospitals could only have  
49 specialist TYA services in one therefore a young person receiving care in one of the other  
50 hospitals was assumed to have had access to specialist TYA services, i.e., they were  
51 assigned to the ALL-TYA-PTC group rather than NO-TYA-PTC. Furthermore, using the Trust  
52 commissioned as a TYA-PTC does not capture the details of the TYA-specific care available  
53 or delivered and assumes that this is equal in all. We know there was wide variation in the  
54 delivery of care through the duration of the study[41]. However, at the time of study inception  
55 HES was the sole data source available that would allow an objective measurement of place  
56 of care. In complementary work, the key elements of specialist age-appropriate care for TYA  
57  
58  
59  
60

Final version

1  
2  
3 have been described[17]. This would provide an alternative categorisation against which to  
4 measure patient and clinical outcomes.  
5

6  
7 The cohort represented approximately a fifth of the total cancer population diagnosed  
8 between July 2012 and December 2014 as ascertained through the National Cancer  
9 Registration and Analysis Service, and there were differences in cancer types between the  
10 cohort and those not recruited[25], which could impact on the generalisability of the results.  
11 For example, the cohort included a higher proportion of young people with germ cell tumours  
12 and lymphoma, but a lower proportion of carcinoma and skin cancers. We used a single  
13 mode of survey administration at wave 1, and multiple modes at waves 2-5. While this may  
14 have introduced a social desirability bias (noted to be more so for telephone interviews than  
15 web-based surveys[42]), this was to increase the response rate as work during the feasibility  
16 study for BRIGHTLIGHT indicated no one method was acceptable to all young people.  
17 Finally, we used a measure of QOL that was validated across the age 13-24 years[37], but  
18 this may not reflect the issues that were most relevant to young people with cancer in the UK  
19 (having been developed in the US in a non-cancer population). This is supported by  
20 comments made in the cognitive interviews undertaken when the survey was being  
21 developed; young people did not agree with the wording of the school functioning domain,  
22 so this was changed to work/school/college[24]. However, young people who were not in  
23 education, employment or training would not be able to answer these questions. Future work  
24 is required to develop TYA-specific QOL measures that reflect issues specific to this  
25 population.  
26  
27  
28  
29  
30

31 Despite these limitations this is the first systematic prospective evaluation of specialist  
32 services for young people with cancer. We have found that TYA cancer care as  
33 commissioned in 2010 resulted in young people's QOL gradually improving 3-years after  
34 diagnosis and improving more rapidly from a lower baseline if young people's treatment  
35 involved a TYA-PTC. NHS care pathways may result in care in specialist centres for young  
36 people with the poorest initial QOL, and local care for those with the least poor initial QOL,  
37 risk stratifying the patients appropriately. Young people who receive some care in both a  
38 children's or adult cancer unit and at a TYA-PTC also have an improvement in QOL, but the  
39 rate of improvement was less and QOL remained lower than for young people treated in a  
40 single type of organisation. The factors influencing place of care and the differences in QOL  
41 and survival remain unclear. A model of 'joint care', increasing the emphasis and investment  
42 in communication between TYA-PTCs and other Trusts designated to deliver elements of  
43 TYA cancer care, is currently proposed by the NHS in England. The influence of such  
44 changes in care provision should be examined prospectively in future to identify if QOL of  
45 young people with cancer is improved wherever care is received.  
46  
47  
48  
49  
50

## 51 REFERENCES

- 52 1. Barr RD. Adolescents, young adults, and cancer—the international challenge, *Cancer*  
53 2011;117:2245-9.
- 54 2. Wang Y, Zhou S, Yang F, et al. Treatment-Related Adverse Events of PD-1 and PD-  
55 L1 Inhibitors in Clinical Trials: A Systematic Review and Meta-analysis. *JAMA*  
56 *Oncology* 2019;5:1008-19.
- 57 3. National Institute for Health and Care Excellence. Guidance on cancer services:  
58 improving outcomes in children and young people with cancer. NICE, London 2005  
59  
60

Final version

- 1
- 2
- 3
- 4 <https://www.nice.org.uk/guidance/csg7/resources/improving-outcomes-in-children-and-young-people-with-cancer-update-773378893> [Accessed 05/08/20]
- 5
- 6 4. Stark D, Bielack S, Brugieres L, et al. Teenagers and young adults with cancer in
- 7 Europe: from national programmes to a European integrated coordinated project.
- 8 *European Journal of Cancer Care* 2016;25:419-27.
- 9
- 10 5. Barr RD. Planning a Comprehensive Program in Adolescent and Young Adult
- 11 Oncology-A Collision with Reality. *Journal of Adolescent & Young Adult Oncology*
- 12 2016;5:303-9.
- 13
- 14 6. Fern L, Taylor RM, Whelan J, et al. 'The art of age appropriate care': using
- 15 participatory research to describe young people's experience of cancer, *Cancer*
- 16 *Nursing*. 2013;36:E27-38.
- 17
- 18 7. Morgan S, Davies S, Palmer S, et al. Sex, drugs and rock 'n' roll: caring for
- 19 adolescents and young adults with cancer, *J Clin Oncol* 2010;28:4825-30.
- 20
- 21 8. Sironi G, Barr RD, Ferrari A. Models of Care-There Is More Than One Way to Deliver,
- 22 *Cancer Journal* 2018;24:315-20.
- 23
- 24 9. Taylor RM, Fern L, Millington H, et al. "Your place or mine?" Priorities for a specialist
- 25 teenage and young adult (TYA) cancer unit: disparity between TYA and professional
- 26 perceptions, *Journal of Adolescent and Young Adult Oncology* 2011;1:145-51.
- 27
- 28 10. Rae CS, Pole JD, Gupta S, et al. Development of System Performance Indicators for
- 29 Adolescent and Young Adult Cancer Care and Control in Canada. *Value in Health*
- 30 2020;23:74-88.
- 31
- 32 11. Whiteson M. The Teenage Cancer Trust-advocating a model for teenage cancer
- 33 services, *European Journal of Cancer* 2003;39:2688-93.
- 34
- 35 12. Osborn M, Johnson R, Thompson K, et al. Models of care for adolescent and young
- 36 adult cancer programs, *Pediatric Blood & Cancer* 2019;66:e27991.
- 37
- 38 13. Smith AW, Bellizzi KM, Keegan THM, et al. Health-related quality of life of adolescent
- 39 and young adult patients with cancer in the United States: the adolescent and young
- 40 adult Health Outcomes and Patient Experience study, *Journal of Clinical Oncology*
- 41 2013;31:2136-46.
- 42
- 43 14. Department of Health. The NHS Constitution: the NHS belongs to us all. London: DoH
- 44 2015.
- 45
- 46 15. Henderson R. What is the NHS? An introduction to the NHS. ;2020.
- 47
- 48 16. O'Hara C, Khan M, McCabe M, et al. Notifications of teenagers and young adults with
- 49 cancer to a principal treatment centre 2009-2010. National Cancer Intelligence
- 50 Network 2013 <http://www.ncin.org.uk/view?rid=2124> [Accessed 05/08/20].
- 51
- 52 17. Lea S, Taylor RM, Martins A, et al. Conceptualising age-appropriate care for teenagers
- 53 and young adults with cancer: a qualitative mixed methods study, *Adolescent Health*
- 54 *Medicine and Therapeutics* 2018;9:149-66.
- 55
- 56 18. Taylor RM, Feltbower RG, Aslam N, et al. Modified international e-Delphi survey to
- 57 define healthcare professional competencies for working with teenagers and young
- 58 adults with cancer. *BMJ Open* 2016;6:e011361.
- 59
- 60 19. Gibson F, Fern L, Whelan J, et al. A scoping exercise of favourable characteristics of
- professionals working in teenage and young adult cancer care: 'thinking outside of the
- box', *Eur J Cancer Care* 2012;21:330-9.
20. Taylor RM, Whelan JS, Gibson F, et al. Involving young people in BRIGHTLIGHT from
- study inception to secondary data analysis: insights from 10 years of user involvement,
- Research Involvement and Engagement* 2018;4:50.

Final version

- 1
  - 2
  - 3
  - 4
  - 5
  - 6
  - 7
  - 8
  - 9
  - 10
  - 11
  - 12
  - 13
  - 14
  - 15
  - 16
  - 17
  - 18
  - 19
  - 20
  - 21
  - 22
  - 23
  - 24
  - 25
  - 26
  - 27
  - 28
  - 29
  - 30
  - 31
  - 32
  - 33
  - 34
  - 35
  - 36
  - 37
  - 38
  - 39
  - 40
  - 41
  - 42
  - 43
  - 44
  - 45
  - 46
  - 47
  - 48
  - 49
  - 50
  - 51
  - 52
  - 53
  - 54
  - 55
  - 56
  - 57
  - 58
  - 59
  - 60
21. Taylor RM, Gibson F, Franck LS. A concept analysis of health-related quality of life in young people with chronic illness, *J Clin Nurs* 2008;17:1823-33.
22. Quinn GP, Goncalves V, Sehovic I, et al. Quality of life in adolescent and young adult cancer patients: a systematic review of the literature, *Patient Related Outcome Measures* 2015;6:19-51.
23. Husson O, Zebrack BJ, Block R, et al. Health-Related Quality of Life in Adolescent and Young Adult Patients with Cancer: A Longitudinal Study. *Journal of Clinical Oncology* 2017;35:652-9.
24. Taylor RM, Fern LA, Solanki A, et al. Development and validation of the BRIGHTLIGHT Survey, a patient-reported experience measure for young people with cancer, *Health and Quality of Life Outcomes* 2015;13:107.
25. Taylor RM, Fern LA, Barber JA, et al. Description of the BRIGHTLIGHT Cohort: the evaluation of teenagers and young adult cancer services in England, *BMJ Open* 2019;9:e027797.
26. Taylor RM, Aslam N, Lea S, et al. Optimizing a retention strategy with young people for BRIGHTLIGHT, a longitudinal cohort study examining the value of specialist cancer care for young people, *Journal of Adolescent and Young Adult Oncology* 2017;6:459-69.
27. Taylor RM, Mohain J, Gibson F, et al. Novel participatory methods of involving patients in research: naming and branding a longitudinal cohort study, BRIGHTLIGHT, *BMC Medical Research Methodology* 2015;15:20.
28. Taylor RM, Solanki A, Aslam N, et al. A participatory study of teenagers and young adults views on access and participation in cancer research, *European Journal of Oncology Nursing* 2016;20:156-64.
29. Martins A, Taylor RM, Lobel B, et al. Sex, body image and relationships- information and support needs of adolescents and young adults: BRIGHTLIGHT, *Journal of Adolescent and Young Adult Oncology* 2018;https://doi.org/10.1089/jayao.2018.0025.
30. Taylor RM, Lobel B, Thompson K, et al. BRIGHTLIGHT researchers as 'dramaturgs': creating There is a Light from complex research data, *Research Involvement and Engagement* 2020;in press.
31. Kenten C, Martins A, Fern LA, et al. Qualitative study to understand the barriers to recruiting young people with cancer to BRIGHTLIGHT: a national cohort study in England, *BMJ Open* 2017;7:e01829.
32. Varni JW, Burwinkle TM, Seid M, et al. The PedsQL (TM) 4.0 as a pediatric population health measure: Feasibility, reliability and validity, *Ambulatory Pediatrics* 2003;3:329-41.
33. Varni J, Burwinkle T, Katz E, et al. The PedsQL in Pediatric Cancer: Reliability and validity of the Pediatric Quality of Life Inventory Generic Core Scales, Multidimensional Fatigue Scale, and Cancer Module, *Cancer* 2002;94:2090-106.
34. Fredericks EM, Magee JC, Oipari-Arrigan L, et al. Adherence and health-related quality of life in adolescent liver transplant recipients, *Pediatr Transplant* 2008;12:289-99.
35. King M, Jones L, Richardson A, et al. The relationship between patients' experiences of continuity of cancer care and health outcomes: a mixed methods study, *Br J Cancer* 2008;98:529-36.
36. Hsieh FY, Bloch DA, Larsen MD. Simple method of sample size calculation for linear and logistic regression, *Stat Med* 1998;17:1623-34.

Final version

- 1
  - 2
  - 3
  - 4
  - 5
  - 6
  - 7
  - 8
  - 9
  - 10
  - 11
  - 12
  - 13
  - 14
  - 15
  - 16
  - 17
  - 18
  - 19
  - 20
  - 21
  - 22
  - 23
  - 24
  - 25
  - 26
  - 27
  - 28
  - 29
  - 30
  - 31
  - 32
  - 33
  - 34
  - 35
  - 36
  - 37
  - 38
  - 39
  - 40
  - 41
  - 42
  - 43
  - 44
  - 45
  - 46
  - 47
  - 48
  - 49
  - 50
  - 51
  - 52
  - 53
  - 54
  - 55
  - 56
  - 57
  - 58
  - 59
  - 60
37. Varni JW, Limbers CA. The PedsQL4.0 generic core scales young adult version: feasibility, reliability and validity in a university student population, *Journal of Health Psychology* 2009;14:611-22.
38. Department for Communities and Local Government. The English Indices of Deprivation 2015 Statistical Release. England: Department for Communities and Local Government 2015.
39. Henderson R, Diggle P, Dobson A. Joint modelling of longitudinal measurements and event time data. *Biostatistics* 2000;1:465-80.
40. Fulop NJ, Ramsay AIG, Perry C, et al. Explaining outcomes in major system change: a qualitative study of implementing centralised acute stroke services in two large metropolitan regions in England. *Implementation Science* 2016;11:80.
41. Vindrola-Padros C, Taylor RM, Lea S, et al. Mapping Adolescent Cancer Services: How Do Young People, Their Families, and Staff Describe Specialized Cancer Care in England?. *Cancer Nurs* 2016;39:358-66.
42. Kreuter F, Presser S, Tourangeau R. Social desirability bias in CATI, IVR, and web surveys: the effects of mode and question sensitivity, *Public Opinion Quarterly* 2008;72:847-65.

#### Author contributions:

RMT, LAF, JB, DS, SM, RF, LH, FG, RR, JSW were involved in developing the protocol. RMT coordinated the running of the study and was responsible for data acquisition. JB, JGA, RMT, LAF, SM, RF, DS, JSW contributed to the analysis. RMT, LAF, JB and JSW drafted the manuscript. All authors critically revised and approved the final manuscript.

#### Acknowledgements:

We would like to thank the members of our Young Advisory Panel (Zeena Beale, Ciaran Fenton, Emily Freemantle, Jaasjan Guvindia, Laura Haddard, Steph Hammersley, Amy Lang, Joshua Lerner, Tanya Loughlin, Jason, Sin Jin Loo, Jennifer Miller, Maria Onasanya, Arif Nasir, Steph Still, Poppy Richards, Amy Riley, Lara Veitch, Freya Voss, JJ Wheeler, Max Williamson, Antonia Young), the 1,114 young people who consented to participate in BRIGHTLIGHT, healthcare professionals who approached and consented young people, and ex-members of the team who have contributed to study management (Catherine O'Hara, Anita Solanki, Natasha Aslam, Zuwena Fox).

We would like to dedicate this manuscript in memory of Mr Stephen Sutton and Mr Mathew Cook who were instrumental to study set up, design and management. Both of whom died from their cancer during the study.

We would also like to thank the following for all their support with recruitment to BRIGHTLIGHT: the National Cancer Research Institute, especially Dr Eileen Loucaides and the Secretariat; Matt Seymour, Matt Cooper and Karen Poole at the former National Cancer Research Network; Maria Khan and Sabrina Sandhu (North West Knowledge Intelligence Team); TYAC; Teenage Cancer Trust; CLIC Sargent; Ipsos MORI; Quality Health and the research teams at 109 NHS Trusts in England who opened BRIGHTLIGHT to recruitment.



Final version

1  
2  
3 Principal Investigators agreeing to be acknowledged for their contribution to BRIGHTLIGHT  
4 recruitment:

5 Claire Hemmaway, Barking, Havering and Redbridge Hospitals NHS Trust; Anita Amadi,  
6 Barnet and Chase Farm Hospitals NHS Trust; Keith Elliott, Barnsley Hospital NHS  
7 Foundation Trust; Leanne Smith, Blackpool, Fylde and Wyre Hospitals NHS Trust; Shirley  
8 Cocks, Bolton NHS Foundation Trust; Victoria Drew, Bradford Teaching Hospitals NHS  
9 Foundation Trust; Elizabeth Pask, Central Manchester University Hospitals NHS Foundation  
10 Trust; Anne Littley, Central Manchester University Hospitals NHS Foundation Trust; Mark  
11 Bower, Chelsea and Westminster Hospital NHS Trust; Scott Marshall, City Hospitals  
12 Sunderland NHS Foundation Trust; Lorna Dewar, Colchester Hospital University NHS Trust;  
13 Nnenna Osuji, Croydon Health Services NHS Trust; David Allotey, Derby Hospitals NHS  
14 Foundation Trust; Karen Jewers, East Lancashire Hospitals NHS Trust; Asha Johny,  
15 Gloucestershire Hospitals NHS Foundation Trust; Nicola Knightly, Great Western Hospitals  
16 NHS Foundation Trust; Robert Carr, Guy's & St Thomas' Hospital NHS Foundation Trust;  
17 Alison Milne, Hampshire Hospitals NHS Foundation Trust; Claire Hall, Harrogate and District  
18 NHS Foundation Trust; James Bailey, Hull and East Yorkshire Hospitals NHS Trust;  
19 Christine Garlick, Ipswich Hospital NHS Foundation Trust; Alison Brown, Isle of Wight  
20 Healthcare NHS Trust; Carolyn Hatch, Lancashire Teaching Hospitals NHS Foundation  
21 Trust; Vivienne E. Andrews, Medway NHS Foundation Trust; Sara Greig, Milton Keynes  
22 Hospital NHS Foundation Trust; Jennifer Wimperis, Norfolk and Norwich University Hospital  
23 NHS Trust; Suriya Kirkpatrick, North Bristol NHS Trust; Jonathan Nicoll, North Cumbria  
24 University Hospitals NHS Trust; Ivo Hennig, Nottingham University Hospitals NHS Trust;  
25 Karen Sherbourne, Oxford Radcliffe Hospital NHS Trust; Clare Turner, Plymouth Hospitals  
26 NHS Trust; Claire Palles-Clark, Royal Surrey County Hospital NHS Trust; Christine Cox,  
27 Royal United Hospital Bath NHS Trust; Yeng Ang, Salford Royal NHS Foundation Trust;  
28 Jonathan Cullis, Salisbury NHS Foundation Trust; Daniel Yeomanson, Sheffield Children's  
29 NHS Foundation Trust; Ruth Logan, Sheffield Teaching Hospitals NHS Foundation Trust;  
30 Deborah Turner, South Devon Healthcare NHS Trust; Dianne Plews, South Tees Hospitals  
31 NHS Trust; Julia Jonasi, Southend University Hospital NHS Foundation Trust; Ruth  
32 Pettengell, St George's Healthcare NHS Trust; Kamal Khoobarry, Surrey & Sussex  
33 Healthcare NHS Trust; Angela Watts, The Dudley Group of Hospitals NHS Foundation Trust;  
34 Louise Soanes, The Royal Marsden NHS Foundation Trust; Claudette Jones, The Royal  
35 Orthopaedic Hospital NHS Trust; Michael Jenkinson, The Walton Centre for Neurology and  
36 Neurosurgery NHS Trust; Nicky Pettitt, University Hospital Birmingham NHS Foundation  
37 Trust; Vijay Agarwal, University Hospital Birmingham NHS Foundation Trust; Beth Harrison,  
38 University Hospitals Coventry and Warwickshire NHS Trust; Fiona Miall, University Hospitals  
39 of Leicester NHS Trust; Gail Wiley, University Hospitals of Morecambe Bay NHS Trust;  
40 Lynda Wagstaff, Walsall Hospitals NHS Trust; Fiona Smith, West Hertfordshire Hospitals  
41 NHS Trust; Sarah Janes, Western Sussex NHS Trust; Serena Hillman, Weston Area Health  
42 NHS Trust; Christopher Zaborowski, Yeovil District Hospital NHS Foundation Trust.

52  
53 Data for this study is based on information collected and quality assured by the PHE  
54 National Cancer Registration and Analysis Service. Access to the data was facilitated by the  
55 PHE Office for Data Release.

56  
57  
58 The Quality of Life study described in this paper was carried out using the PedsQL,  
59 developed by Dr James W. Varni.  
60

Final version

1  
2  
3 Competing interests:  
4 None declared.  
5

6  
7 Ethics Approval:

8 The study was approved by the Health Research Authority Confidentiality Advisory Group  
9 (reference ECC 8-05(d)/2011) and London Bloomsbury NHS Research Ethics Committee  
10 (reference LO/11/1718).  
11

12  
13 Funding:

14 This paper presents independent research funded by the National Institute for Health  
15 Research (NIHR) under its Programme Grants for Applied Research Programme (Grant  
16 Reference Number RP-PG-1209-10013). The views expressed are those of the author(s)  
17 and not necessarily those of the NHS, the NIHR or the Department of Health. The  
18 BRIGHTLIGHT Team acknowledges the support of the NIHR, through the Cancer Research  
19 Network.  
20

21  
22 LAF and LH are funded by Teenage Cancer Trust, DS holds research grant funding from  
23 Teenage Cancer Trust, and RR was (in part) supported by the National Institute for Health  
24 Research (NIHR) Collaboration for Leadership in Applied Health Research and Care  
25 (CLAHRC) North Thames at Bart's Health NHS Trust. RMT is a National Institute for Health  
26 Research (NIHR) Senior Nurse Research Leader. The views expressed in this article are  
27 those of the author and not necessarily those of the NIHR, or the Department of Health and  
28 Social Care. None of the funding bodies have been involved with study concept, design or  
29 decision to submit the manuscript. JAG was subsidised by the Ramon & Cajal programme  
30 operated by the Ministry of Economy and Business (RYC-2016-19353), and the European  
31 Social Fund.  
32  
33  
34

35  
36 Data sharing statement:

37 Further details of the BRIGHTLIGHT programme of work are available through the study  
38 website ([www.brightlightstudy.com](http://www.brightlightstudy.com)). Data that are not held under licence with Public Health  
39 England or NHS Digital will be available from late 2020 when the primary analysis is  
40 complete. We welcome collaboration, for general data sharing enquiries please contact RMT  
41 ([rtaylor13@nhs.net](mailto:rtaylor13@nhs.net)).  
42  
43  
44  
45  
46  
47  
48  
49  
50  
51  
52  
53  
54  
55  
56  
57  
58  
59  
60

Final version

## Figure legends

### Figure 1: Participation at each wave of data collection

\*Drop-outs between waves due to death, permanent optout or wave opt-out. Wave opt-outs prior to being issued were not permanent opt-outs; participants could opt-out of a single wave but participate in subsequent waves; these cases were not removed from the cohort permanently.

### Figure 2: Mean PedsQL total score over time since diagnosis (with 95% confidence intervals)

Graph based on data collected in Waves 1 to 5, plotted against median time since diagnosis.

### Figure 3: Subgroup investigations for cancer type (leukaemia/lymphoma v other) and age group (<19 v 19+): Results from adjusted\* random effects models with interaction terms (N=733)

\* model with a random effect for city and adjustment for time since diagnosis, age at diagnosis, type of cancer, socioeconomic status, severity of cancer, ethnicity, Choice about where to receive treatment, Long term condition prior to cancer, days from 1st symptom to diagnosis, number of GP visits before diagnosis.

### Figure 4: Mean PedsQL physical functioning domain scores over time since diagnosis (with 95% confidence intervals)

(Graphs based on data collected in Waves 1 to 5, plotted against median time since diagnosis.)

### Figure 5: Mean PedsQL emotional functioning domain scores over time since diagnosis (with 95% confidence intervals)

(Graphs based on data collected in Waves 1 to 5, plotted against median time since diagnosis.)

### Figure 6: Mean PedsQL social functioning domain scores over time since diagnosis (with 95% confidence intervals)

(Graphs based on data collected in Waves 1 to 5, plotted against median time since diagnosis.)

### Figure 7: Mean PedsQL work/school/college functioning domain scores over time since diagnosis (with 95% confidence intervals)

(Graphs based on data collected in Waves 1 to 5, plotted against median time since diagnosis.)

### Figure 8: Mean PedsQL Psychosocial summary score scores over time since diagnosis (with 95% confidence intervals)

(Graphs based on data collected in Waves 1 to 5, plotted against median time since diagnosis.)

1  
2  
3  
4  
5  
6  
7  
8  
9  
10  
11  
12  
13  
14  
15  
16  
17  
18  
19  
20  
21  
22  
23  
24  
25  
26  
27  
28  
29  
30  
31  
32  
33  
34  
35  
36  
37  
38  
39  
40  
41  
42  
43  
44  
45  
46  
47  
48  
49  
50  
51  
52  
53  
54  
55  
56  
57  
58  
59  
60

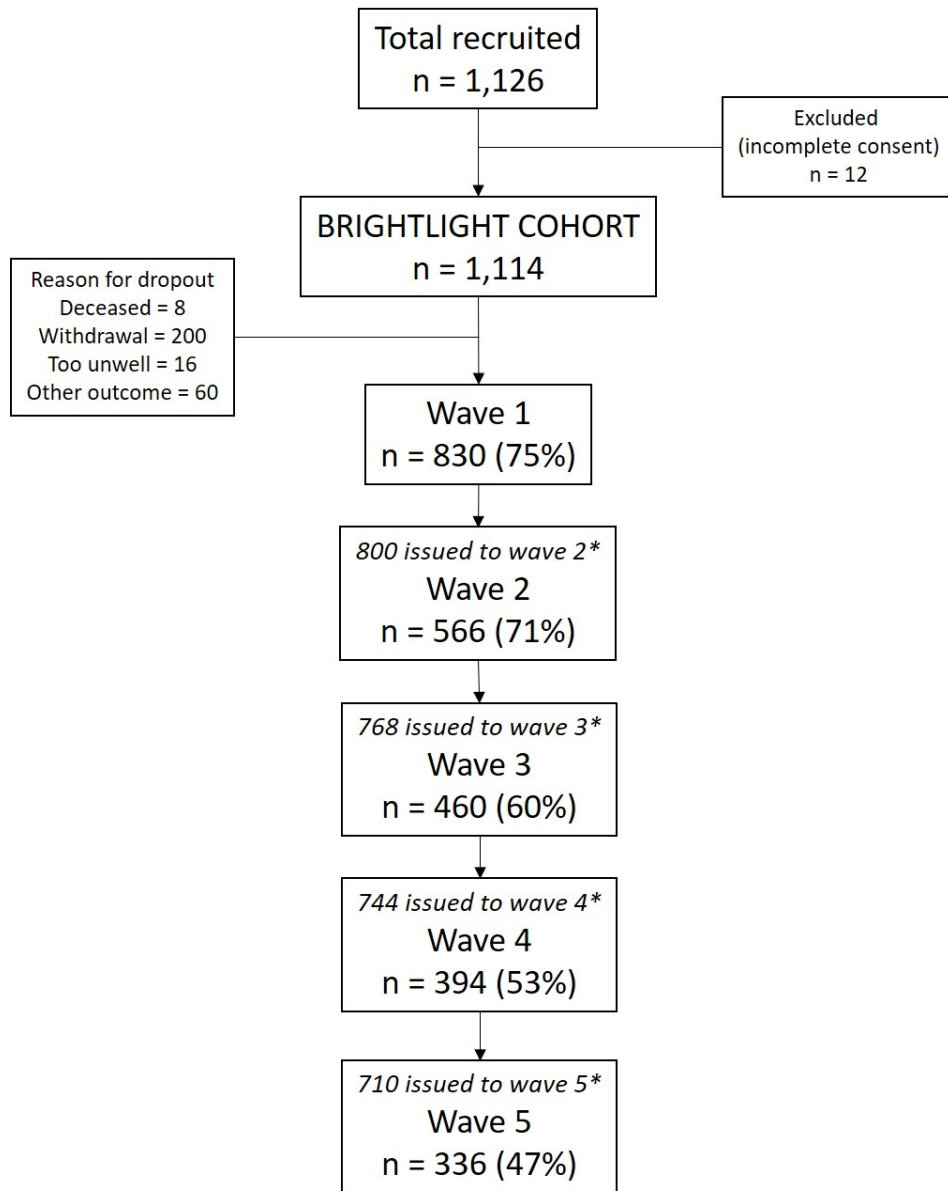

85x108mm (300 x 300 DPI)

1  
2  
3  
4  
5  
6  
7  
8  
9  
10  
11  
12  
13  
14  
15  
16  
17  
18  
19  
20  
21  
22  
23  
24  
25  
26  
27  
28  
29  
30  
31  
32  
33  
34  
35  
36  
37  
38  
39  
40  
41  
42  
43  
44  
45  
46  
47  
48  
49  
50  
51  
52  
53  
54  
55  
56  
57  
58  
59  
60

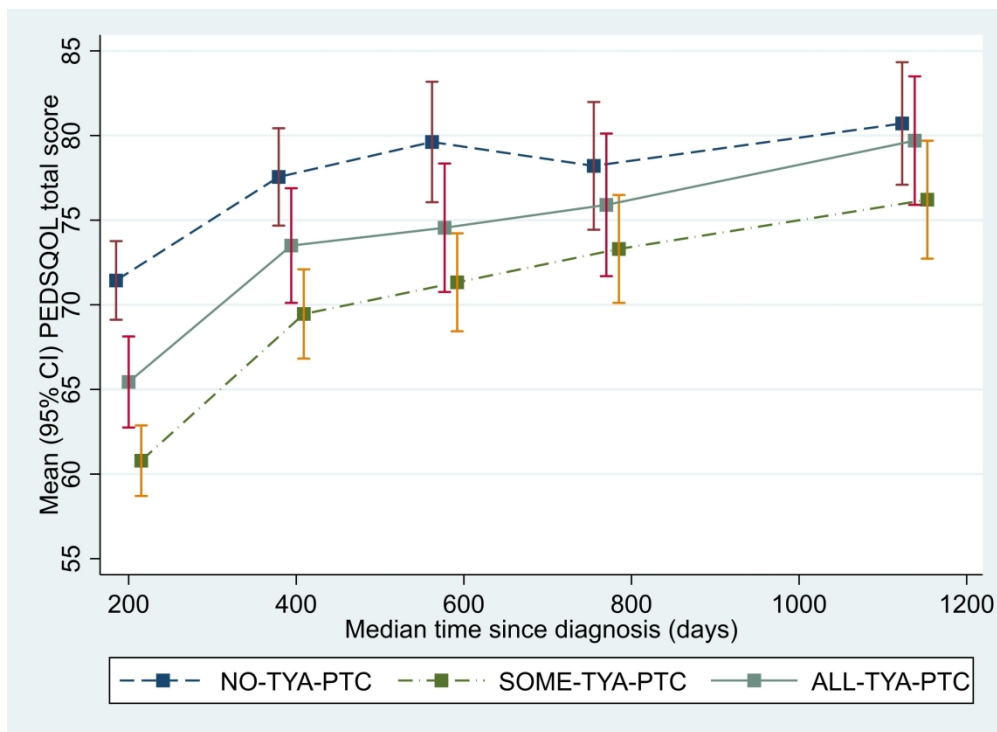

279x203mm (300 x 300 DPI)

1  
2  
3  
4  
5  
6  
7  
8  
9  
10  
11  
12  
13  
14  
15  
16  
17  
18  
19  
20  
21  
22  
23  
24  
25  
26  
27  
28  
29  
30  
31  
32  
33  
34  
35  
36  
37  
38  
39  
40  
41  
42  
43  
44  
45  
46  
47  
48  
49  
50  
51  
52  
53  
54  
55  
56  
57  
58  
59  
60

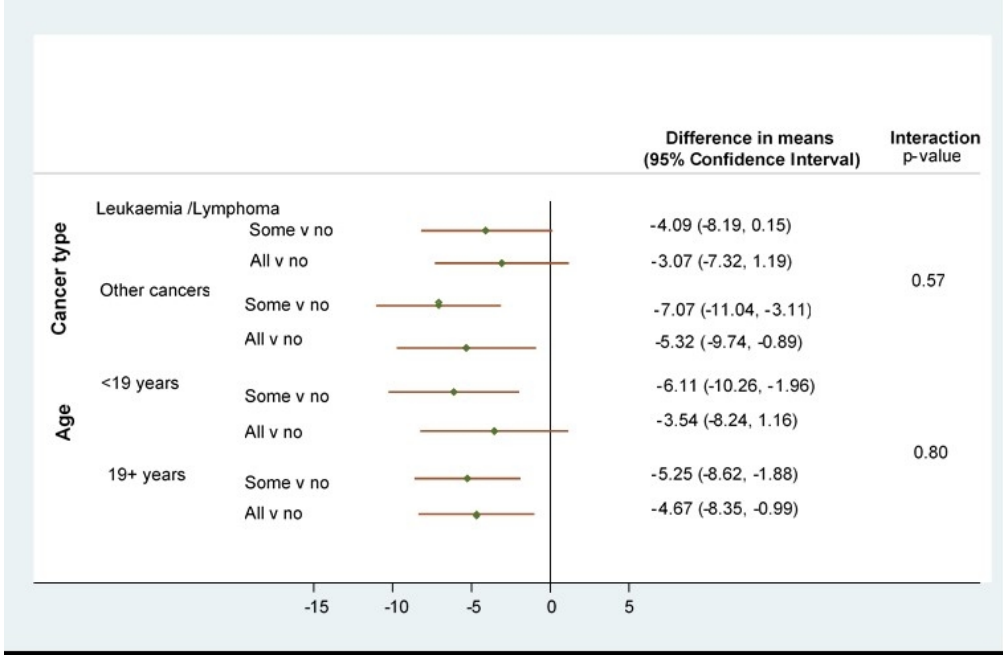

63x41mm (300 x 300 DPI)

1  
2  
3  
4  
5  
6  
7  
8  
9  
10  
11  
12  
13  
14  
15  
16  
17  
18  
19  
20  
21  
22  
23  
24  
25  
26  
27  
28  
29  
30  
31  
32  
33  
34  
35  
36  
37  
38  
39  
40  
41  
42  
43  
44  
45  
46  
47  
48  
49  
50  
51  
52  
53  
54  
55  
56  
57  
58  
59  
60



279x203mm (300 x 300 DPI)

1  
2  
3  
4  
5  
6  
7  
8  
9  
10  
11  
12  
13  
14  
15  
16  
17  
18  
19  
20  
21  
22  
23  
24  
25  
26  
27  
28  
29  
30  
31  
32  
33  
34  
35  
36  
37  
38  
39  
40  
41  
42  
43  
44  
45  
46  
47  
48  
49  
50  
51  
52  
53  
54  
55  
56  
57  
58  
59  
60

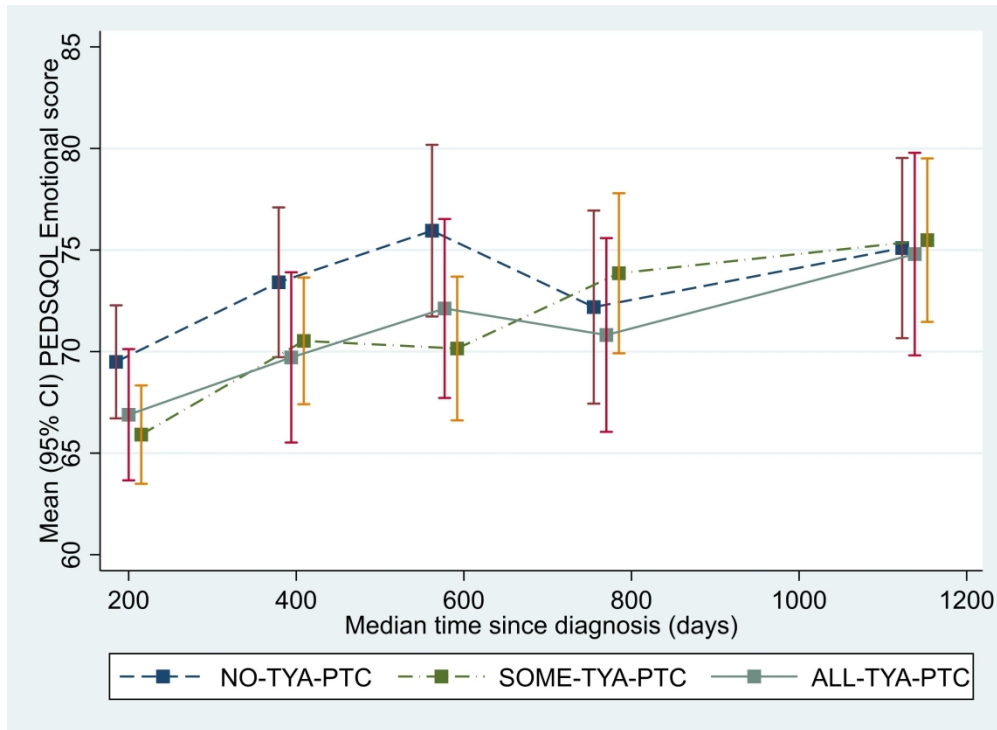

279x203mm (300 x 300 DPI)



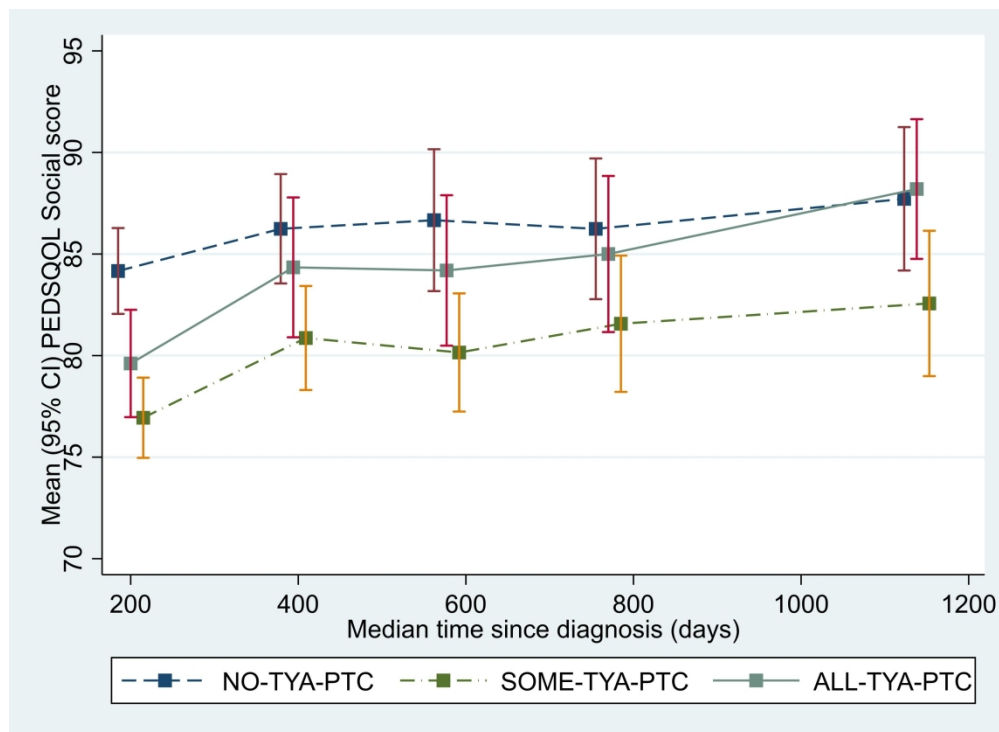

279x203mm (300 x 300 DPI)

1  
2  
3  
4  
5  
6  
7  
8  
9  
10  
11  
12  
13  
14  
15  
16  
17  
18  
19  
20  
21  
22  
23  
24  
25  
26  
27  
28  
29  
30  
31  
32  
33  
34  
35  
36  
37  
38  
39  
40  
41  
42  
43  
44  
45  
46  
47  
48  
49  
50  
51  
52  
53  
54  
55  
56  
57  
58  
59  
60



279x203mm (300 x 300 DPI)

1  
2  
3  
4  
5  
6  
7  
8  
9  
10  
11  
12  
13  
14  
15  
16  
17  
18  
19  
20  
21  
22  
23  
24  
25  
26  
27  
28  
29  
30  
31  
32  
33  
34  
35  
36  
37  
38  
39  
40  
41  
42  
43  
44  
45  
46  
47  
48  
49  
50  
51  
52  
53  
54  
55  
56  
57  
58  
59  
60

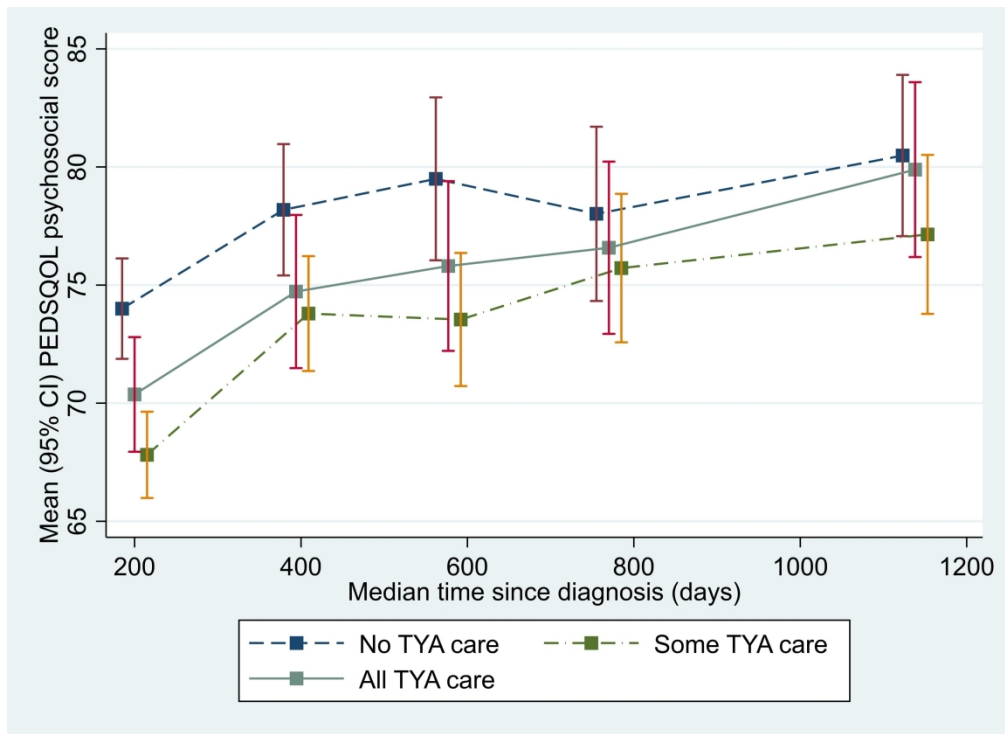

279x203mm (300 x 300 DPI)

Supplemental file

Figure A1: Matrix representing the causal diagram explaining confounding variable to enter in the Directed Acyclic Graph (DAG)

|           | TYA SCL | QOL | Age | Choice | CS | CT | DoH | Ethnicity | Finances | Gender | Geography | I&C | LTC | RtD | SE | SES | SS | Treatment |
|-----------|---------|-----|-----|--------|----|----|-----|-----------|----------|--------|-----------|-----|-----|-----|----|-----|----|-----------|
| TYA SCL   |         | ↗   | ↘   | ↘      | ↘  | ↘  | ↘   | ↘         | ↘        | O      | ↘         | ↘   | ↘   | ↘   | ↘  | ↘   | ↘  | ↘         |
| QOL       |         |     | ↘   | ↘      | ↘  | ↘  | ↘   | ↘         | ↘        | ↘      | ↘         | ↘   | ↘   | ↘   | ↘  | ↘   | ↘  | ↘         |
| Age       |         |     |     | ↘      | O  | ↘  | ↘   | O         | ↘        | O      | O         | ↘   | ↘   | ↘   | ↘  | ↘   | ↘  | ↘         |
| Choice    |         |     |     |        | ↘  | ↘  | O   | ↘         | ↘        | O      | ↘         | ↘   | ↘   | ↘   | ↘  | ↘   | ↘  | ↘         |
| CS        |         |     |     |        |    | ↘  | ↘   | ↘         | ↘        | O      | ↘         | ↘   | ↘   | ↘   | ↘  | ↘   | ↘  | ↘         |
| CT        |         |     |     |        |    |    | ↘   | ↘         | ↘        | ↘      | ↘         | ↘   | ↘   | ↘   | ↘  | ↘   | ↘  | ↘         |
| DoH       |         |     |     |        |    |    |     | ↘         | ↘        | ↘      | ↘         | ↘   | ↘   | ↘   | ↘  | ↘   | ↘  | ↘         |
| Ethnicity |         |     |     |        |    |    |     |           | ↘        | O      | ↘         | ↘   | ↘   | ↘   | ↘  | ↘   | ↘  | ↘         |
| Finances  |         |     |     |        |    |    |     |           |          | O      | ↘         | ↘   | ↘   | ↘   | O  | ↘   | ↘  | ↘         |
| Gender    |         |     |     |        |    |    |     |           |          |        |           | O   | ↘   | ↘   | ↘  | O   | ↘  | ↘         |
| Geography |         |     |     |        |    |    |     |           |          |        |           |     | ↘   | ↘   | ↘  | ↘   | ↘  | ↘         |
| I&C       |         |     |     |        |    |    |     |           |          |        |           |     | ↘   | ↘   | ↘  | ↘   | ↘  | ↘         |
| LTC       |         |     |     |        |    |    |     |           |          |        |           |     |     | ↘   | ↘  | ↘   | ↘  | ↘         |
| RtD       |         |     |     |        |    |    |     |           |          |        |           |     |     |     | ↘  | ↘   | ↘  | ↘         |
| SE        |         |     |     |        |    |    |     |           |          |        |           |     |     |     |    | ↘   | ↘  | ↘         |
| SES       |         |     |     |        |    |    |     |           |          |        |           |     |     |     |    |     | ↘  | ↘         |
| SS        |         |     |     |        |    |    |     |           |          |        |           |     |     |     |    |     |    | ↘         |
| Treatment |         |     |     |        |    |    |     |           |          |        |           |     |     |     |    |     |    |           |

CS: cancer severity; CT: cancer type; DoH: duration of hospitalisation; I&C: information & communication; LTC: long-term condition; QOL: quality of life; RtD: route to diagnosis; SE: symptom experience; SES: socioeconomic status; SS: social support  
 O – indicates a null relationship

Table A1: PedsQL total score by Wave of data collection

|        | NO-TYA-PTC |               |                        | SOME-TYA-PTC |               |                        | ALL-TYA-PTC |               |                        |
|--------|------------|---------------|------------------------|--------------|---------------|------------------------|-------------|---------------|------------------------|
|        | N          | Mean (SD)     | Median (IQR)           | N            | Mean (SD)     | Median (IQR)           | N           | Mean (SD)     | Median (IQR)           |
| Wave 1 | 276        | 71.44 (19.68) | 73.22 (57.61 to 89.13) | 312          | 60.79 (18.79) | 59.71 (47.52 to 75.00) | 193         | 65.44 (19.07) | 66.30 (52.78 to 80.56) |
| Wave 2 | 173        | 77.55 (19.31) | 83.70 (61.96 to 93.48) | 209          | 69.46 (19.45) | 71.74 (54.35 to 85.87) | 122         | 73.50 (19.08) | 77.17 (58.33 to 88.04) |
| Wave 3 | 126        | 79.62 (20.38) | 85.87 (68.48 to 95.65) | 164          | 71.33 (18.91) | 73.76 (59.75 to 84.78) | 99          | 74.55 (19.26) | 80.43 (59.72 to 91.30) |
| Wave 4 | 121        | 78.21 (21.16) | 84.78 (64.13 to 95.65) | 118          | 73.30 (33.33) | 76.24 (60.87 to 86.96) | 98          | 75.90 (21.27) | 82.61 (61.96 to 93.48) |
| Wave 5 | 103        | 80.71 (18.75) | 86.96 (71.74 to 95.65) | 113          | 76.21 (18.90) | 78.26 (65.22 to 93.48) | 75          | 79.70 (16.78) | 85.87 (70.65 to 91.30) |

Table A2: Results from adjusted mixed effects models investigating the relationship between levels of TYA care received during the first 12 months from diagnosis and the quality of life – excluding bone cancer (N=667)

|                                  |              | Difference in means | 95% Confidence Interval | P-value  |
|----------------------------------|--------------|---------------------|-------------------------|----------|
| TYA care category (v NO-TYA-PTC) | SOME-TYA-PTC | -6.02               | -9.02 to -3.02          | P=0.0003 |
|                                  | ALL-TYA-PTC  | -4.53               | -7.72 to -1.35          |          |

\* results from a three level model for repeated measurements of QOL over time since diagnosis, with a random effect for city and adjustment for time since diagnosis, age at diagnosis, type of cancer, socioeconomic status, severity of cancer, ethnicity, choice about where to receive treatment, long-term condition prior to cancer, days from 1<sup>st</sup> symptom to diagnosis, number of GP visits before diagnosis.

Table A3: Subgroup investigation for lymphoma v other cancer: Results from adjusted\* mixed effects models with interaction terms (N=733)

|                    | <b>TYA care category</b>  | <b>Adjusted difference in means</b> | <b>95% confidence interval</b> | <b>P-value from interaction</b> |
|--------------------|---------------------------|-------------------------------------|--------------------------------|---------------------------------|
| <b>Cancer type</b> |                           |                                     |                                |                                 |
| Lymphoma           | SOME-TYA-PTC v NO-TYA-PTC | -6.01                               | -9.58 to -2.44                 | 0.90                            |
|                    | ALL-TYA-PTC v NO-TYA-PTC  | -4.13                               | -8.08 to -0.17                 |                                 |
| All other cancers  | SOME-TYA-PTC v NO-TYA-PTC | -4.89                               | -9.63 to -0.16                 |                                 |
|                    | ALL-TYA-PTC v NO-TYA-PTC  | -4.31                               | -9.18 to 0.55                  |                                 |

\* model with a random effect for city and adjustment for time since diagnosis, age at diagnosis, type of cancer, socioeconomic status, severity of cancer, ethnicity, choice about where to receive treatment, long-term condition prior to cancer, days from 1<sup>st</sup> symptom to diagnosis, number of GP visits before diagnosis.

Table A4: Results from a joint model of longitudinal quality of life scores and survival investigating their relationship with level of TYA care received during the first 12 months from diagnosis (N=733)\*

|                                  |              | <b>Difference in means</b> | <b>95% Confidence Interval</b> |
|----------------------------------|--------------|----------------------------|--------------------------------|
| TYA care category (v NO-TYA-PTC) | SOME-TYA-PTC | -6.45                      | -9.34 to -3.56                 |
|                                  | ALL-TYA-PTC  | -6.11                      | -9.58 to -2.64                 |

\* Models fitted using Stata command *stjm* with a Weibull submodel for survival (reference: M Crowther, K Abrams, P Lambert. Joint modelling of longitudinal and survival data. The Stata Journal (2013) 13, Number 1, pp. 165–184) Adjustment for time since diagnosis, age at diagnosis, type of cancer, socioeconomic status, severity of cancer, ethnicity, choice about where to receive treatment, long-term condition prior to cancer, days from 1<sup>st</sup> symptom to diagnosis, number of GP visits before diagnosis and city (as a fixed effect as a three level model could not be fitted).

**STROBE 2007 (v4) Statement—Checklist of items that should be included in reports of *cohort studies***

| Section/Topic                | Item # | Recommendation                                                                                                                                                                       | Reported on page #              |
|------------------------------|--------|--------------------------------------------------------------------------------------------------------------------------------------------------------------------------------------|---------------------------------|
| <b>Title and abstract</b>    | 1      | (a) Indicate the study's design with a commonly used term in the title or the abstract                                                                                               | 1                               |
|                              |        | (b) Provide in the abstract an informative and balanced summary of what was done and what was found                                                                                  | 2-3                             |
| <b>Introduction</b>          |        |                                                                                                                                                                                      |                                 |
| Background/rationale         | 2      | Explain the scientific background and rationale for the investigation being reported                                                                                                 | 3-4                             |
| Objectives                   | 3      | State specific objectives, including any prespecified hypotheses                                                                                                                     | 4                               |
| <b>Methods</b>               |        |                                                                                                                                                                                      |                                 |
| Study design                 | 4      | Present key elements of study design early in the paper                                                                                                                              | 4                               |
| Setting                      | 5      | Describe the setting, locations, and relevant dates, including periods of recruitment, exposure, follow-up, and data collection                                                      | 5                               |
| Participants                 | 6      | (a) Give the eligibility criteria, and the sources and methods of selection of participants. Describe methods of follow-up                                                           | 5 (reference cited for details) |
|                              |        | (b) For matched studies, give matching criteria and number of exposed and unexposed                                                                                                  | na                              |
| Variables                    | 7      | Clearly define all outcomes, exposures, predictors, potential confounders, and effect modifiers. Give diagnostic criteria, if applicable                                             | 5                               |
| Data sources/<br>measurement | 8*     | For each variable of interest, give sources of data and details of methods of assessment (measurement). Describe comparability of assessment methods if there is more than one group | 5                               |
| Bias                         | 9      | Describe any efforts to address potential sources of bias                                                                                                                            | 6                               |
| Study size                   | 10     | Explain how the study size was arrived at                                                                                                                                            | 5                               |
| Quantitative variables       | 11     | Explain how quantitative variables were handled in the analyses. If applicable, describe which groupings were chosen and why                                                         | 6                               |
| Statistical methods          | 12     | (a) Describe all statistical methods, including those used to control for confounding                                                                                                | 6                               |
|                              |        | (b) Describe any methods used to examine subgroups and interactions                                                                                                                  | 6                               |
|                              |        | (c) Explain how missing data were addressed                                                                                                                                          | 6                               |
|                              |        | (d) If applicable, explain how loss to follow-up was addressed                                                                                                                       | 6                               |
|                              |        | (e) Describe any sensitivity analyses                                                                                                                                                | 6                               |

|                          |     |                                                                                                                                                                                                              |                                            |
|--------------------------|-----|--------------------------------------------------------------------------------------------------------------------------------------------------------------------------------------------------------------|--------------------------------------------|
| <b>Results</b>           |     |                                                                                                                                                                                                              |                                            |
| Participants             | 13* | (a) Report numbers of individuals at each stage of study—eg numbers potentially eligible, examined for eligibility, confirmed eligible, included in the study, completing follow-up, and analysed            | 6, reference cited, also supplemental file |
|                          |     | (b) Give reasons for non-participation at each stage                                                                                                                                                         | supplemental file                          |
|                          |     | (c) Consider use of a flow diagram                                                                                                                                                                           | supplemental file                          |
| Descriptive data         | 14* | (a) Give characteristics of study participants (eg demographic, clinical, social) and information on exposures and potential confounders                                                                     | 8                                          |
|                          |     | (b) Indicate number of participants with missing data for each variable of interest                                                                                                                          | supplemental file                          |
|                          |     | (c) Summarise follow-up time (eg, average and total amount)                                                                                                                                                  | supplemental file                          |
| Outcome data             | 15* | Report numbers of outcome events or summary measures over time                                                                                                                                               | supplemental file                          |
| Main results             | 16  | (a) Give unadjusted estimates and, if applicable, confounder-adjusted estimates and their precision (eg, 95% confidence interval). Make clear which confounders were adjusted for and why they were included | 11                                         |
|                          |     | (b) Report category boundaries when continuous variables were categorized                                                                                                                                    | na                                         |
|                          |     | (c) If relevant, consider translating estimates of relative risk into absolute risk for a meaningful time period                                                                                             | na                                         |
| Other analyses           | 17  | Report other analyses done—eg analyses of subgroups and interactions, and sensitivity analyses                                                                                                               | 11 and supplemental file                   |
| <b>Discussion</b>        |     |                                                                                                                                                                                                              |                                            |
| Key results              | 18  | Summarise key results with reference to study objectives                                                                                                                                                     | 12                                         |
| <b>Limitations</b>       |     |                                                                                                                                                                                                              |                                            |
| Interpretation           | 20  | Give a cautious overall interpretation of results considering objectives, limitations, multiplicity of analyses, results from similar studies, and other relevant evidence                                   | 13-14                                      |
| Generalisability         | 21  | Discuss the generalisability (external validity) of the study results                                                                                                                                        | 13-14                                      |
| <b>Other information</b> |     |                                                                                                                                                                                                              |                                            |
| Funding                  | 22  | Give the source of funding and the role of the funders for the present study and, if applicable, for the original study on which the present article is based                                                | 16                                         |

\*Give information separately for cases and controls in case-control studies and, if applicable, for exposed and unexposed groups in cohort and cross-sectional studies.



1  
2 **Note:** An Explanation and Elaboration article discusses each checklist item and gives methodological background and published examples of transparent reporting. The STROBE  
3 checklist is best used in conjunction with this article (freely available on the Web sites of PLoS Medicine at <http://www.plosmedicine.org/>, Annals of Internal Medicine at  
4 <http://www.annals.org/>, and Epidemiology at <http://www.epidem.com/>). Information on the STROBE Initiative is available at [www.strobe-statement.org](http://www.strobe-statement.org).  
5  
6  
7  
8  
9  
10  
11  
12  
13  
14  
15  
16  
17  
18  
19  
20  
21  
22  
23  
24  
25  
26  
27  
28  
29  
30  
31  
32  
33  
34  
35  
36  
37  
38  
39  
40  
41  
42  
43  
44  
45  
46

For peer review only

# BMJ Open

## Longitudinal cohort study of the impact of specialist cancer services for teenagers and young adults on quality of life: outcomes from the BRIGHTLIGHT study

|                                 |                                                                                                                                                                                                                                                                                                                                                                                                                                                                                                                                                                                                                                                                                                                                                                                                                                                                                                                                                                                                                                                                                                                                                                       |
|---------------------------------|-----------------------------------------------------------------------------------------------------------------------------------------------------------------------------------------------------------------------------------------------------------------------------------------------------------------------------------------------------------------------------------------------------------------------------------------------------------------------------------------------------------------------------------------------------------------------------------------------------------------------------------------------------------------------------------------------------------------------------------------------------------------------------------------------------------------------------------------------------------------------------------------------------------------------------------------------------------------------------------------------------------------------------------------------------------------------------------------------------------------------------------------------------------------------|
| Journal:                        | <i>BMJ Open</i>                                                                                                                                                                                                                                                                                                                                                                                                                                                                                                                                                                                                                                                                                                                                                                                                                                                                                                                                                                                                                                                                                                                                                       |
| Manuscript ID                   | bmjopen-2020-038471.R2                                                                                                                                                                                                                                                                                                                                                                                                                                                                                                                                                                                                                                                                                                                                                                                                                                                                                                                                                                                                                                                                                                                                                |
| Article Type:                   | Original research                                                                                                                                                                                                                                                                                                                                                                                                                                                                                                                                                                                                                                                                                                                                                                                                                                                                                                                                                                                                                                                                                                                                                     |
| Date Submitted by the Author:   | 07-Oct-2020                                                                                                                                                                                                                                                                                                                                                                                                                                                                                                                                                                                                                                                                                                                                                                                                                                                                                                                                                                                                                                                                                                                                                           |
| Complete List of Authors:       | Taylor, Rachel; University College London Hospitals NHS Foundation Trust, CNMAR<br>Fern, Lorna; University College London Hospitals NHS Foundation Trust, Oncology<br>Barber, Julie; University College London, Department of Statistical Science<br>Alvarez-Galvez, Javier; University of Cadiz, Department of Biomedicine, Biotechnology and Public Health<br>Feltbower, Richard; University of Leeds,<br>Lea, Sarah; University College London Hospitals NHS Foundation Trust<br>Martins, Ana; University College London Hospitals NHS Foundation Trust<br>Morris, Stephen; University of Cambridge School of Clinical Medicine, Primary Care Unit<br>Hooker, Louise; University Hospital Southampton NHS Foundation Trust, Wessex Teenage and Young Adult Cancer Service,<br>Gibson, Faith; University of Surrey, Faculty of Health and Medical Sciences; Great Ormond Street Hospital For Children NHS Foundation Trust,<br>Raine, Rosalind; University College London, Institute of Epidemiology & Health<br>Stark, Dan; University of Leeds, Leeds Insitute of Molecular Medicine<br>Whelan, Jeremy; University College London Hospitals NHS Foundation Trust, |
| <b>Primary Subject Heading</b>: | Health services research                                                                                                                                                                                                                                                                                                                                                                                                                                                                                                                                                                                                                                                                                                                                                                                                                                                                                                                                                                                                                                                                                                                                              |
| Secondary Subject Heading:      | Oncology                                                                                                                                                                                                                                                                                                                                                                                                                                                                                                                                                                                                                                                                                                                                                                                                                                                                                                                                                                                                                                                                                                                                                              |
| Keywords:                       | Organisation of health services < HEALTH SERVICES ADMINISTRATION & MANAGEMENT, ONCOLOGY, Quality in health care < HEALTH SERVICES ADMINISTRATION & MANAGEMENT                                                                                                                                                                                                                                                                                                                                                                                                                                                                                                                                                                                                                                                                                                                                                                                                                                                                                                                                                                                                         |
|                                 |                                                                                                                                                                                                                                                                                                                                                                                                                                                                                                                                                                                                                                                                                                                                                                                                                                                                                                                                                                                                                                                                                                                                                                       |

SCHOLARONE™  
Manuscripts

1  
2  
3  
4  
5  
6  
7  
8  
9  
10  
11  
12  
13  
14  
15  
16  
17  
18  
19  
20  
21  
22  
23  
24  
25  
26  
27  
28  
29  
30  
31  
32  
33  
34  
35  
36  
37  
38  
39  
40  
41  
42  
43  
44  
45  
46  
47  
48  
49  
50  
51  
52  
53  
54  
55  
56  
57  
58  
59  
60

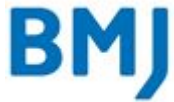

I, the Submitting Author has the right to grant and does grant on behalf of all authors of the Work (as defined in the below author licence), an exclusive licence and/or a non-exclusive licence for contributions from authors who are: i) UK Crown employees; ii) where BMJ has agreed a CC-BY licence shall apply, and/or iii) in accordance with the terms applicable for US Federal Government officers or employees acting as part of their official duties; on a worldwide, perpetual, irrevocable, royalty-free basis to BMJ Publishing Group Ltd ("BMJ") its licensees and where the relevant Journal is co-owned by BMJ to the co-owners of the Journal, to publish the Work in this journal and any other BMJ products and to exploit all rights, as set out in our [licence](#).

The Submitting Author accepts and understands that any supply made under these terms is made by BMJ to the Submitting Author unless you are acting as an employee on behalf of your employer or a postgraduate student of an affiliated institution which is paying any applicable article publishing charge ("APC") for Open Access articles. Where the Submitting Author wishes to make the Work available on an Open Access basis (and intends to pay the relevant APC), the terms of reuse of such Open Access shall be governed by a Creative Commons licence – details of these licences and which [Creative Commons](#) licence will apply to this Work are set out in our licence referred to above.

Other than as permitted in any relevant BMJ Author's Self Archiving Policies, I confirm this Work has not been accepted for publication elsewhere, is not being considered for publication elsewhere and does not duplicate material already published. I confirm all authors consent to publication of this Work and authorise the granting of this licence.

Final version

1  
2  
3 Longitudinal cohort study of the impact of specialist cancer services for teenagers and young  
4 adults on quality of life: outcomes from the BRIGHTLIGHT study  
5  
6  
7

8 Rachel M Taylor PhD, Lorna A Fern PhD, Julie A Barber PhD, Javier Alvarez-Galvez PhD,  
9 Richard G Feltbower PhD, Sarah Lea PhD, Ana Martins PhD, Stephen Morris PhD, Louise  
10 Hooker MSc, Faith Gibson PhD, Rosalind Raine PhD, <sup>11</sup>Dan P Stark MD, <sup>2</sup>Jeremy S Whelan  
11 MD  
12  
13

14  
15 Rachel Taylor, Director of the CNMAR, Centre for Nurse, Midwife and AHP Led Research  
16 (CNMAR), University College London Hospitals NHS Foundation Trust, London NW1 2PG  
17  
18

19 Lorna Fern, NCRI Teenage and Young Adult Researcher, Patient/Public Involvement Lead  
20 Cancer Division, University College London Hospitals NHS Foundation Trust, London NW1  
21 2PG  
22  
23

24 Julie Barber, Associate Professor in Medical Statistics, Department of Statistical Science,  
25 University College, London WC1E 6BT  
26  
27

28 Javier Alvarez-Galvez, Research Fellow, Department of Biomedicine, Biotechnology and  
29 Public Health, University of Cadiz, Avda. Ana de Viya, 52, 11009 Cádiz, Spain  
30  
31

32 Richard Feltbower, Senior Lecturer in Epidemiology, School of Medicine, University of  
33 Leeds, Leeds, LS2 9JT.  
34  
35

36 Sarah Lea, Research Facilitator, Cancer Division, University College London Hospitals NHS  
37 Foundation Trust, London NW1 2PG  
38  
39

40 Ana Martins, Research Associate, Cancer Division, University College London Hospitals  
41 NHS Foundation Trust, London NW1 2PG  
42  
43

44 Stephen Morris, Professor of Health Economics, Primary Care Unit, Department of Public  
45 Health and Primary Care, University of Cambridge, United Kingdom  
46  
47

48 Louise Hooker, Teenage Cancer Trust Lead Nurse, Wessex Teenage and Young Adult  
49 Cancer Service, University Hospital Southampton, Southampton, SO16 5YA  
50  
51

52 Faith Gibson, Professor of Child Health and Cancer Care, School of Health Sciences,  
53 Faculty of Health and Medical Sciences, University of Surrey, Guildford, Surrey GU2 7XH  
54 and Centre for Outcomes and Experience Research in Children's Health, Illness and  
55 Disability (ORCHID), Great Ormond Street Hospital for Children NHS Foundation Trust,  
56 London WCIN3JH  
57  
58

59 Rosalind Raine, Professor of Health Services research, Department of Applied Health  
60 Research, Director, NIHR CLAHRC North Thames, NIHR Senior Investigator, University  
College London, London WC1E 7HB

Final version

1  
2  
3 Dan Stark, Professor of Teenage and Young Adult Cancer Research and Consultant  
4 Medical Oncologist, Leeds Institute of Medical Research at St James's, Leeds LS9 7TF  
5

6  
7 Jeremy Whelan, Professor of Cancer Medicine, Cancer Division, University College London  
8 Hospitals NHS Foundation Trust, London NW1 2PG  
9

10 Correspondence: Dr Lorna Fern, lorna.fern@nhs.net  
11

12  
13 Keywords: BRIGHTLIGHT, teenagers and young adults, cancer, observational research,  
14 cohort, outcome, quality of life, experience  
15

16 Abstract = 300/300

17 Word count = 4,088

18 Number of Tables = 3

19 Number of Figures = 8  
20  
21  
22

## 23 ABSTRACT

24  
25  
26 *Objectives:* In England, healthcare policy advocates specialised age-appropriate services for  
27 teenagers and young adults (TYA), those aged 13-24 years at diagnosis. Specialist Principal  
28 Treatment Centres (PTC) provide enhanced TYA age-specific care, although many still  
29 receive care in adult or children's cancer services. We present the first prospective  
30 structured analysis of quality of life (QOL) associated with the amount of care received in a  
31 TYA-PTC  
32  
33

34  
35 *Design:* Longitudinal cohort study  
36

37  
38 *Setting:* Hospitals delivering in-patient cancer care in England  
39

40  
41 *Participants:* 1,114 young people aged 13-24 years newly diagnosed with cancer  
42

43  
44 *Intervention:* Exposure to the TYA-PTC defined as patients receiving NO-TYA-PTC care with  
45 those receiving ALL-TYA-PTC and SOME-TYA-PTC care.  
46

47  
48 *Primary outcome:* quality of life measured at five time points: 6,12,18, 24 and 36-months  
49 after diagnosis  
50

51  
52 *Results:* Group mean total QOL improved over time for all patients, but for those receiving  
53 NO-TYA-PTC was an average of 5.6 points higher (95% CI 2.8-8.5) than in young people  
54 receiving SOME-TYA-PTC care, and 4.2 points higher (95% CI 1.1-7.3) compared to ALL-  
55 TYA-PTC care. Differences were greatest 6 months after diagnosis, reduced over time, and  
56 did not meet the 8-point level that is proposed to be clinically significant. Young people  
57 receiving NO-TYA-PTC care were more likely to have been offered a choice of place of care,  
58 be older, from more deprived areas, in work, and have less severe disease. However,  
59 analyses adjusting for confounding factors did not explain the differences between TYA  
60 groups.

Final version

1  
2  
3  
4 *Conclusions:* Receipt of some or all care in a TYA-PTC was associated with lower QOL  
5 shortly after cancer diagnosis. The NO-TYA-PTC group had higher QOL three years after  
6 diagnosis, however those receiving all or some care in a TYA-PTC experienced more rapid  
7 QOL improvements. Despite this, the difference were small and may not be clinically  
8 significant. Receipt of some care in a TYA-PTC requires further study.  
9  
10

### 11 **Strengths & limitations of this study**

12 5 bullet points

- 13 • We present the first national evaluation of a model of care which aims to improve  
14 outcomes for teenagers and young adults with cancer.
- 15 • We were able to quantify where young people received care through nationally  
16 collated hospital activity data so we could objectively assign young people to a group  
17 representing the model of care received.
- 18 • Analysis of longitudinal data for three years after diagnosis was adjusted for multiple  
19 confounding variables, identified from a conceptual model of patient experience,  
20 which underpinned data collection in the study.
- 21 • The measure quantifying where care was received was based on the assumption  
22 that all teenage and young adult Principal Treatment Centres provided equivalent  
23 facilities and care.
- 24 • The cohort comprises 20% of young people diagnosed with cancer during the time  
25 period, which could impact on the generalisability of the results.  
26  
27  
28  
29  
30  
31

## 32 **INTRODUCTION**

33  
34  
35 Cancer in teenagers and young adults (TYA) is uncommon. Despite this, cancer in young  
36 people aged 15-29 years at diagnosis accounts for an estimated 350,000 new incidence  
37 cases and incidence rates are rising[1]. Lower survival rates than younger children in several  
38 common cancer types[2] have fuelled many international initiatives aimed to improve  
39 outcomes and wellbeing[3,4]. In particular, the need for specialist age-appropriate care and  
40 environments are advocated as a critical component of good cancer care for TYA[5-9].  
41 However, the effect on clinical and patient-reported outcomes associated with age-  
42 appropriate care are yet to be described[10].  
43  
44

45  
46 Distinct cancer service provision for TYA began in the United Kingdom (UK) in the  
47 1990s[11]. This was initiated by clinician and patient advocacy, promoting principles which  
48 responded to young people's reports of care that frequently lacked support for their priorities  
49 of progress towards normal life goals and care alongside others of a similar age delivered by  
50 professionals who understood young people[12]. Specialised services for young people  
51 being treated for cancer within the National Health Service (NHS) have been mandated in  
52 England since 2005 by the National Institute for Health and Clinical Excellence (NICE)  
53 guidance[3]. The guidance identified that young people's needs may be poorly met in  
54 children's and older adult services working in isolation from each other[4], and that TYA-  
55 specific places of treatment and care may be key to achieving better outcomes for young  
56 people with cancer[9] due in part to the distinct impact of cancer on young people's  
57 wellbeing, such as in the physical, psychosocial and developmental domains[13].  
58  
59  
60

Final version

## The delivery of cancer care for TYA in England

Healthcare in England is in the main, publicly funded through the NHS providing universal comprehensive healthcare to all citizens. “The service is configured to improve, prevent, diagnose and treat physical and mental health problems with equal regard”[14]. Secondary care is delivered in NHS Trusts. Each Trust has its own Chief Executive and leadership team and while they are governed by central NHS legislation, each Trust works as an independent entity. The configuration and delivery of services is therefore unique to each Trust, ensuring that each geographical region in England has access to essential healthcare services. Healthcare delivery by a Trust could be provided in a single hospital providing all the required services or it could be a merger of multiple hospitals in the geographical area each providing specific services (for example: <https://www.uclh.nhs.uk/OurServices/OurHospitals/Pages/Home.aspx>)[15].

The model of specialised TYA cancer care implemented from 2005 focused on 13 TYA Principal Treatment Centres (TYA-PTC) in England. These were based in 13 different Trusts, selected to complement the existing services delivered in children’s cancer units (aged up to 16 years in the main but local variation would accept older teenagers) and adult cancer services from 18 years onward. The TYA-PTCs were funded to deliver specialist care, which included the same standard of cancer care as the children and adult units but care was enhanced by the addition of age-appropriate environments and multi-disciplinary teams experienced in working with TYA. For example, providing education and career support to enable TYA to continue with education and employment at a critical time in their lives; nurse specialists who were skilled at discussing challenging subjects (sex, fertility, drug and alcohol use); space to interact with other TYA with cancer to promote normal development and youth support coordinators who provide youth support and facilitate peer to peer activities(see Morgan et al[7] for examples of what is included in a TYA unit).

The location of the TYA-PTCs were chosen based on a number of factors, including existing established service, geographical location and other cancer services available. The guidance directed that TYA aged 16-18 years must be treated in a TYA-PTC, while young adults aged 19-24 years were to be offered the choice to receive care in a TYA-PTC or a local cancer unit that could provide their cancer treatment and some aspects of age-appropriate care. There was variation in the lower age of admission in TYA-PTCs based on history and availability of other services locally so this resulted in TYA aged 13-16 being treated in a children’s cancer unit or TYA-PTC and those aged 17-24 could be admitted to a TYA-PTC or adult cancer unit. By 2010, about two-thirds of those aged 15-18 years and one-third of 19-24-year olds were believed to have contact with a TYA-PTC[16]. Place of care was therefore directed by clinicians based on cancer type and geographical location. While there is an international mobilisation to implement specialist TYA services[12], including in other European countries, Australasia and North America, the impact of such services on clinical outcomes has not been robustly evaluated.

The BRIGHTLIGHT study is a prospective evaluation of the benefits of specialist TYA services in the English NHS. In order to capture the complexity of the delivery of TYA cancer care, it comprised an evaluation from the perspective of the environment of care [17], the workforce delivering care [18] and young people receiving care. BRIGHTLIGHT was developed with extensive input from young people as well as health professionals [6, 9, 19]



Final version

and based on consultation with young people[20]. This included input into the selection of the primary outcome: quality of life (QOL).

Quality of Life is defined as "...subjective, multidimensional and dynamic. It is unique to each individual and includes aspects of physical, psychological and social function. It is dependent not only upon the stage of development but also the illness trajectory. This involves the achievement of goals and aspirations and the constraints imposed through ill health and treatment"[21]. Measurement of QOL uses the patient's own report to evaluate the spectrum of impact of illness upon them and has become an increasingly valued healthcare outcome. Previous reports of young people's QOL after a cancer diagnosis have shown this to be significantly lower than normative population data[22]. Longitudinal assessment has indicated QOL improved in the first year after diagnosis but there was no significant improvement in the second year [23]. No evaluation beyond the second year has been reported and while studies have investigated predictors of QOL there has been no evaluation of the impact of different models of delivery of care on QOL. We examined QOL at 6, 12, 18, 24 and 36 months after diagnosis in relation to the proportion of care young people received in a TYA-PTC

## METHODS

### Study design

The BRIGHTLIGHT study is a mixed methods programme of research. Results from an embedded longitudinal cohort study, obtaining data from young people through a bespoke survey[24], are reported here. The survey was administered at five time points during the first three years after diagnosis (6, 12, 18, 24 and 36 months, waves 1-5 respectively). A scale was developed, previously described in detail[25], using Hospital Episode Statistics (HES) in-patient data to measure episodes of care in different NHS Trusts and then used to assign young people to one of three levels of TYA care dependent on how much in-patient HES activity recorded in the first 12 months after diagnosis was delivered in a TYA-PTC: no care in a TYA-PTC, i.e., all care was delivered in a children's or adult cancer unit (NO-TYA-PTC), some care delivered in a TYA-PTC with additional care in a children's or adult cancer unit (SOME-TYA-PTC) or all care delivered in a TYA-PTC (ALL-TYA-PTC).

### Patient and public involvement

BRIGHTLIGHT has been developed with young people from the point of inception and our Young Advisory Panel (YAP) have been involved in the management, implementation and dissemination of the study. This has been reported in detail previously [20, 26-29] but in summary, BRIGHTLIGHT was developed based on consultation with young people attending a patient conference in 2008: place of care was identified as the third priority for future research. Young people worked with the research team to conduct the research informing the National Institute for Health Research grant application[6] including representation as a co-applicant. The YAP have advised on changes to recruitment[28], helped develop the retention strategy[26], informed additional studies[29], and are involved in dissemination[30].

### Participants and setting

Final version

1  
2  
3 BRIGHTLIGHT was open to recruitment between October 2012 and April 2015 in 109  
4 English NHS hospitals of which 97 recruited at least one young person. Eligibility was  
5 defined as aged 13-24 years at the time of diagnosis, newly diagnosed with cancer (ICD-10  
6 codes C00-C97) and recruited within four months of diagnosis. There was no eligibility  
7 exclusion for a language or sensory impairment affecting communication. The following  
8 groups were excluded: those serving a custodial sentence; not anticipated to be alive at the  
9 first point of data collection (6-months after diagnosis); or incapable of completing a survey.  
10 Details of the recruitment process are reported elsewhere[25,31]. Young people gave  
11 written consent and parental consent was also obtained for those less than 16 years.  
12 Checks were made through the Demographic Batch Service at NHS digital before each  
13 wave of data collection to ensure young people were alive and to obtain their most recent  
14 address. The study was approved by London-Bloomsbury NHS Research Ethics Committee  
15 and the Confidentiality Advisory Group of the Health Research Authority.  
16  
17  
18  
19

20 The sample size calculation was based on a comparison between the three levels of TYA  
21 care[25] for the primary outcome of PedsQL total score[32], measured at five time points  
22 over the three-year follow-up. Previously reported PedsQL data for childhood cancer  
23 patients suggested a standard deviation for this score of 16[33]. To detect a difference in  
24 scores of 8 units with 80% power[34] required a sample of 200 young people. This  
25 calculation assumed a significance level of 0.01 (2 sided) to allow for multiple comparisons  
26 between three levels of TYA care and assumed an average of three repeated  
27 measurements per patient (intra cluster correlation 0.3 as suggested as a maximum for  
28 similar patient outcomes[35]). The calculation allowed for adjustment for confounding factors  
29 using a variance inflation factor with a correlation of 0.5[36]. To ensure adequate power to  
30 examine the effect of TYA care on QOL within subgroups of age at diagnosis (13-18 and 19-  
31 24 years) and type of tumour (haematological, solid tumour groups), the minimum required  
32 sample size was raised to 800 (80% power).  
33  
34  
35  
36

### 37 **Data collection**

38 Data were collected from three sources: young people's self-report, patient clinical records,  
39 and NHS and Public Health England (PHE) databases. Details of these data sources are  
40 reported elsewhere[25]. Data presented here are responses to the BRIGHTLIGHT Survey, a  
41 bespoke survey containing five validated questionnaires and 169 descriptive questions  
42 related to post diagnosis experience. The survey was administered through face-to-face  
43 interviews in young people's homes by an independent research company at the first time  
44 point and either online or telephone interview at subsequent waves of data collection[24].  
45  
46  
47

48 This paper reports data for the primary outcome, QOL, which was measured using the  
49 Pediatric Quality of Life Questionnaire (PedsQL)[32]. At the time of study development this  
50 was the only measure of QOL validated for teenagers and young adults[37]. It contains 23  
51 items rated using a five-point Likert Scale (Never, Almost never, Sometimes, Often, Almost  
52 always). Responses are presented as four domain scores (physical, emotional, social, and  
53 work/studies functioning), two summary scores (physical and psychosocial function) and a  
54 total score. Domain, summary and total scores range from 0-100, with 100 representing the  
55 best possible QOL.  
56  
57  
58

### 59 **Analysis**

Final version

1  
2  
3 Analysis was carried out following a predefined statistical analysis plan using STATA version  
4 15. A mixed effects model was used to investigate the relationship between the levels of  
5 TYA care and the PedsQL total score, allowing for repeated measurements taken over the 3  
6 years since diagnosis. The model was adjusted for confounding factors identified based on  
7 the conceptual model underpinning the BRIGHTLIGHT Survey[6,24] and using a causal  
8 diagram in the form of a Directed Acyclic Graph (DAG) (DAGitty software [www.dagitty.net](http://www.dagitty.net);  
9 Supplemental File, Figure A1). Factors adjusted for were age at diagnosis, type of cancer  
10 (leukaemia, lymphoma, brain and central nervous system, bone tumours, sarcoma, germ  
11 cell, melanoma, carcinomas, other), socioeconomic status (Index of Multiple Deprivation  
12 (IMD)[38] quintile), severity of cancer (least, intermediate, most[25]), ethnicity (white, other),  
13 choice offered about where to receive treatment (yes/no), presence of any long term  
14 condition prior to cancer (yes/no), days from first symptom to diagnosis and number of  
15 General Practitioner visits before diagnosis. Geographical location (specified as 12 cities,  
16 derived from the TYA-PTC and their network of hospitals) was included in the model as a  
17 random effect. Models were extended to include interaction terms to investigate predefined  
18 subgroup effects by age at diagnosis (both as a continuous factor and using categories of  
19 13-18 and 19-24 years) and tumour type (haematological and solid tumours). An interaction  
20 with time since diagnosis was also examined to investigate whether the relationship between  
21 level of TYA care and QOL changed over time. Similar models were fitted for the PedsQL  
22 domain scores for physical, social, emotional and work/school/college functioning, and the  
23 psychosocial summary score.  
24  
25  
26  
27  
28  
29

30 The extent and patterns of missing QOL data over time were examined using summary  
31 statistics and profile plots. As there is no provision in the scoring of PedsQL to directly  
32 account for death, our main analysis did not distinguish between data 'missing' following  
33 death and that missing for other reasons. With the possibility of informative missing data due  
34 to deaths, a sensitivity analysis was carried where joint mixed-effect models for the  
35 longitudinal QOL scores and time until death were fitted to account for the correlation  
36 between the QOL and survival outcomes[39]. The QOL estimates for the effect of level of  
37 TYA care were then compared with those obtained from previously fitted mixed models.  
38  
39

## 40 RESULTS

41  
42  
43 A total of 1,126 young people were recruited. BRIGHTLIGHT survey data at wave 1 were  
44 available for 830 (75%) participants and details of numbers at each wave are summarised in  
45 Figure 1. Characteristics of those who did and did not complete wave 1 were similar, except  
46 for a higher proportion of non-white participants not completing wave 1 (12% vs. 19%,  
47  $p=.004$ ) [25]. Forty-eight participants could not be assigned a level of TYA-PTC care as  
48 there were no linked HES inpatient records available. Data from 782 young people were  
49 therefore included. There were fewer young people receiving ALL-TYA-PTC care ( $n=193$ ;  
50 25%) in comparison to SOME-TYA-PTC ( $n=312$ ; 40%) and NO-TYA-PTC ( $n=277$ ; 35%).  
51 Demographic characteristics and summary of variables adjusted for in the analysis are  
52 shown in Table 1. Young people who received NO-TYA-PTC care were slightly older, more  
53 likely to be working full/part time, had less severe disease, had a better prognosis and were  
54 more likely to have been given a choice in their place of care. Young people who had ALL-  
55 TYA-PTC care were more likely to come from less deprived areas.  
56  
57  
58  
59  
60

Final version

Table 1: Participant characteristics according to level of care at wave 1

| Characteristic                                 |                               | Level of TYA care at 12 months from diagnosis |                       |                      |
|------------------------------------------------|-------------------------------|-----------------------------------------------|-----------------------|----------------------|
|                                                |                               | NO-TYA-PTC<br>N=277                           | SOME-TYA-PTC<br>N=312 | ALL-TYA-PTC<br>N=193 |
| <b>Age at diagnosis (years)</b>                | Mean (SD)                     | 21.04 (3.01)                                  | 19.40 (3.41)          | 19.97 (3.15)         |
| <b>Age groups</b>                              | 13-15 years                   | 37 (10%)                                      | 72 (17%)              | 40 (15%)             |
|                                                | 16-18 years                   | 34 (10%)                                      | 128 (31%)             | 78 (29%)             |
|                                                | 19-24 years                   | 288 (80%)                                     | 215 (52%)             | 152 (56%)            |
| <b>Gender</b>                                  | Male                          | 148 (53%)                                     | 165 (53%)             | 112 (58%)            |
|                                                | Female                        | 129 (47%)                                     | 147 (47%)             | 81 (42%)             |
| <b>Ethnicity*</b>                              | White                         | 252 (91%)                                     | 273 (88%)             | 163 (84%)            |
|                                                | Mixed                         | 4 (1%)                                        | 5 (2%)                | 4 (2%)               |
|                                                | Asian                         | 15 (5%)                                       | 24 (8%)               | 20 (10%)             |
|                                                | Black                         | 4 (1%)                                        | 7 (2%)                | 2 (1%)               |
|                                                | Other                         | 2 (1%)                                        | 3 (1%)                | 4 (2%)               |
| <b>Socioeconomic status<br/>(IMD quintile)</b> | 1 – most deprived             | 66 (24%)                                      | 73 (24%)              | 34 (18%)             |
|                                                | 2                             | 47 (17%)                                      | 52 (17%)              | 32 (17%)             |
|                                                | 3                             | 51 (19%)                                      | 60 (20%)              | 37 (20%)             |
|                                                | 4                             | 65 (24%)                                      | 61 (20%)              | 40 (21%)             |
|                                                | 5 – least deprived            | 46 (17%)                                      | 59 (19%)              | 46 (24%)             |
| <b>Marital Status</b>                          | Married/civil partnership     | 9 (4%)                                        | 8 (3%)                | 6 (3%)               |
|                                                | Cohabiting                    | 43 (17%)                                      | 27 (10%)              | 18 (10%)             |
|                                                | Single/divorced               | 198 (79%)                                     | 227 (87%)             | 148 (86%)            |
| <b>Current status</b>                          | Working full/part time        | 126 (45%)                                     | 72 (23%)              | 43 (22%)             |
|                                                | In education                  | 61 (22%)                                      | 112 (36%)             | 81 (42%)             |
|                                                | Other work                    | 6 (2%)                                        | 5 (2%)                | 6 (3%)               |
|                                                | (apprentice/intern/voluntary) |                                               |                       |                      |

Final version

|                                                |                           |                |                |               |
|------------------------------------------------|---------------------------|----------------|----------------|---------------|
|                                                | Unemployed                | 10 (4%)        | 11 (4%)        | 7 (4%)        |
|                                                | Long term sick            | 39 (14%)       | 51 (16%)       | 31 (16%)      |
|                                                | Not seeking work          | 35 (13%)       | 61 (20%)       | 25 (13%)      |
| <b>Type of cancer (Birch classification)</b>   | Leukaemia                 | 19 (7%)        | 49 (16%)       | 33 (17%)      |
|                                                | Lymphoma                  | 111 (40%)      | 75 (24%)       | 70 (36%)      |
|                                                | CNS                       | 9 (3%)         | 9 (3%)         | 12 (6%)       |
|                                                | Bone                      | 7 (3%)         | 59 (19%)       | 3 (2%)        |
|                                                | Sarcomas                  | 8 (3%)         | 31 (10%)       | 15 (8%)       |
|                                                | Germ cell                 | 64 (19%)       | 55 (18%)       | 31 (16%)      |
|                                                | Skin                      | 22 (8%)        | 1 (<1%)        | 4 (2%)        |
|                                                | Carcinomas (not skin)     | 41 (15%)       | 31 (10%)       | 23 (12%)      |
|                                                | Miscellaneous specified** | 5 (2%)         | 2 (<1%)        | 1 (<1%)       |
|                                                | Unspecified Malignant     | 1 (<1%)        | 0              | 1 (<1%)       |
| <b>Severity at diagnosis (row %, column %)</b> | Least                     | 200 (46%, 72%) | 133 (31%, 43%) | 95 (22%, 49%) |
|                                                | Intermediate              | 49 (26%, 18%)  | 82 (44%, 26%)  | 56 (30%, 29%) |
|                                                | Most                      | 28 (17%, 10%)  | 97 (58%, 31%)  | 42 (25%, 22%) |
| <b>Prognostic score</b>                        | <50%                      | 21 (8%)        | 60 (19%)       | 41 (21%)      |
|                                                | 50-80%                    | 54 (20%)       | 125 (40%)      | 44 (23%)      |
|                                                | >80%                      | 200 (73%)      | 126 (41%)      | 108 (56%)     |
| <b>Location***</b>                             | Birmingham                | 41 (15%)       | 59 (19%)       | 12 (6%)       |
|                                                | Bristol                   | 51 (18%)       | 32 (10%)       | 4 (2%)        |
|                                                | Cambridge                 | 12 (4%)        | 8 (3%)         | 1 (1%)        |
|                                                | Manchester                | 22 (8%)        | 35 (11%)       | 11 (6%)       |
|                                                | Merseyside                | 13 (5%)        | 11 (4%)        | 6 (3%)        |
|                                                | East Midlands             | 15 (5%)        | 24 (8%)        | 60 (31%)      |
|                                                | Leeds                     | 20 (7%)        | 25 (8%)        | 25 (13%)      |
|                                                | Newcastle                 | 13 (5%)        | 6 (2%)         | 24 (12%)      |
|                                                | Oxford                    | 5 (2%)         | 4 (1%)         | 7 (4%)        |

Final version

|                                                                    |                          |                                          |                                           |                                            |
|--------------------------------------------------------------------|--------------------------|------------------------------------------|-------------------------------------------|--------------------------------------------|
|                                                                    | London                   | 60 (22%)                                 | 83 (27%)                                  | 10 (5%)                                    |
|                                                                    | Sheffield                | 7 (3%)                                   | 9 (3%)                                    | 9 (5%)                                     |
|                                                                    | Southampton              | 18 (7%)                                  | 16 (5%)                                   | 24 (12%)                                   |
| <b>Given a choice about where to receive treatment<sup>§</sup></b> | Yes                      | N=272<br>121 (45%)                       | N=311<br>86 (28%)                         | N=192<br>48 (25%)                          |
|                                                                    | No (or < 19 years)       | 151 (56%)                                | 225 (72%)                                 | 144 (75%)                                  |
| <b>Long term condition prior to cancer</b>                         | Yes                      | N=277<br>20 (7%)                         | N=311<br>34 (11%)                         | N=193<br>18 (9%)                           |
|                                                                    | No                       | 257 (93%)                                | 277 (89%)                                 | 175 (91%)                                  |
| <b>Time to diagnosis: days from 1<sup>st</sup> symptom</b>         | Median (IQR), [min, max] | N=264<br>62 (29.5 to 168.5)<br>[0, 1340] | N=304<br>65.5 (29.5 to 152.5)<br>[0, 959] | N=188<br>63.5 (25.5 to 151.0)<br>[0, 1217] |
| <b>Time to diagnosis: number of GP visits before diagnosis</b>     | Median (IQR), [min, max] | N=274<br>1 (0 to 3)<br>[0, 20]           | N=311<br>1 (0 to 3)<br>[0, 20]            | N=193<br>2 (1 to 3)<br>[0, 40]             |

\* Wave 1 data was used with missing values completed using available PHE data.

\*\* includes 4 'unclassified' – treated in cancer unit but did not have cancer

\*\*\*Includes the TYA-PTC and hospitals linked to the multi-disciplinary team at the TYA-PTC; where available based on hospital of diagnosis, for 77 cases based on recruiting hospital

§ Those <19 years at diagnosis were assumed not to have been given a choice

Final version

Longitudinal changes in the average QOL total score according to the level of care are shown in Figure 2 (summary by wave is given in Supplemental file, Table A1). Across all time periods this illustrates lower QOL score for those in the SOME and ALL-TYA-PTC groups compared to the NO-TYA-PTC group. Differences between level of care appeared to diminish steadily over time. The negative coefficients for levels of care from the model indicate that across the 3 year period of the study QOL scores were on average higher for those with NO-TYA-PTC care compared with SOME-TYA-PTC and ALL-TYA-PTC with a larger difference compared with the SOME-TYA-PTC category (Table 2). The differences were statistically significant but fell inside the threshold of 8 points proposed to be clinically significant [32]. There was no evidence that the relationship between QOL and level of care was different for the combined group of leukaemia/lymphomas compared with other cancers. Also, there was no evidence of a difference by age at diagnosis (Figure 3). There was evidence that the QOL/Level of care relationship changed over time such that differences between the groups diminished i.e. slopes for SOME-TYA-PTC and ALL-TYA-PTC over time are steeper than for NO-TYA-PTC, therefore rates of improvement of QOL were superior in the ALL-TYA-PTC and SOME-TYA-PTC (Table 3), mirroring what was seen in Figure 2.

Analysis of the physical functioning and work/school/college functioning domain scores showed a similar pattern to that seen for the total QOL score. The SOME-TYA-PTC group had a mean difference in physical functioning of -8.28 compared to the NO\_TYA-PTC group, which was statistically significant and above the threshold for clinical significance. For the emotional functioning domain however, difference between groups were less marked and notably the average difference in scores between the SOME-TYA-PTC and NO-TYA-PTC was reduced. Difference between groups in terms of social functioning and the psychosocial summary scores were small and not statistically significant (Figures 4-8, Table 2).

Table 2: Mixed model investigating the relationship between levels of TYA care received during the first 12 months from diagnosis and total quality of life and domain scores over 3 years (N=733)

|                                                |                     | Difference in means | 95% Confidence Interval | P-value  |
|------------------------------------------------|---------------------|---------------------|-------------------------|----------|
| <b>TOTAL QUALITY OF LIFE SCORE (n=733)</b>     |                     |                     |                         |          |
| <b>TYA care category (v NO-TYA-PTC)</b>        | SOME-TYA-PTC        | -5.63               | -8.49 to -2.77          | P=0.0005 |
|                                                | ALL-TYA-PTC         | -4.17               | -7.28 to -1.07          |          |
| <b>PHYSICAL FUNCTIONING (N=733)</b>            |                     |                     |                         |          |
| <b>TYA care category (v NO-TYA-PTC)</b>        | <b>SOME-TYA-PTC</b> | -8.28               | -11.95 to -4.61         | P=0.0001 |
|                                                | <b>ALL-TYA-PTC</b>  | -4.79               | -8.76 to -0.81          |          |
| <b>EMOTIONAL FUNCTIONING (N=733)</b>           |                     |                     |                         |          |
| <b>TYA care category (v NO-TYA-PTC)</b>        | <b>SOME-TYA-PTC</b> | -4.29               | -7.79 to -0.80          | P=0.015  |
|                                                | <b>ALL-TYA-PTC</b>  | -5.43               | -9.29 to -1.57          |          |
| <b>SOCIAL FUNCTIONING (N=733)</b>              |                     |                     |                         |          |
| <b>TYA care category (v NO-TYA-PTC)</b>        | <b>SOME-TYA-PTC</b> | -2.96               | -5.77 to -0.16          | P=0.099  |
|                                                | <b>ALL-TYA-PTC</b>  | -2.49               | -5.60 to 0.62           |          |
| <b>WORK/SCHOOL/COLLEGE FUNCTIONING (N=595)</b> |                     |                     |                         |          |
| <b>TYA care category (v NO-TYA-PTC)</b>        | <b>SOME-TYA-PTC</b> | -6.87               | -10.45 to -3.30         | P=0.0007 |
|                                                | <b>ALL-TYA-PTC</b>  | -4.67               | -8.47 to -0.87          |          |
| <b>PSYCHOSOCIAL SUMMARY SCORE (N=600)</b>      |                     |                     |                         |          |
| <b>TYA care category</b>                       | <b>SOME-TYA-PTC</b> | -2.51               | -5.71 to 0.70           | P=0.074  |

Final version

|                |             |       |                |  |
|----------------|-------------|-------|----------------|--|
| (v NO-TYA-PTC) | ALL-TYA-PTC | -3.96 | -7.44 to -0.48 |  |
|----------------|-------------|-------|----------------|--|

\* results from a three level model for repeated measurements of QOL over time since diagnosis, with a random effect for geography and adjustment for time since diagnosis, age at diagnosis, type of cancer, socioeconomic status, severity of cancer, ethnicity, choice about where to receive treatment, long-term condition prior to cancer, days from 1<sup>st</sup> symptom to diagnosis, number of GP visits before diagnosis. Missing data for 96 due to missing TYA category and missing data in other covariates

\*\* Likelihood ratio test

Table 3: Investigation of changes in QOL score over time: Results from adjusted\* mixed effects models with interaction term (time months x TYA-PTC category). Coefficients for time describe the linear increase in QOL score per month within each TYA care category (N=733)

| TYA care category | Coefficient for time (per month) | 95% confidence interval | P-value from interaction |
|-------------------|----------------------------------|-------------------------|--------------------------|
| NO-TYA-PTC        | 0.26                             | 0.18 to 0.34            | 0.004                    |
| SOME-TYA-PTC      | 0.45                             | 0.37 to 0.53            |                          |
| ALL-TYA-PTC       | 0.37                             | 0.27 to 0.46            |                          |

\* model with a random effect for city and adjustment for time since diagnosis, age at diagnosis, type of cancer, socioeconomic status, severity of cancer, ethnicity, choice about where to receive treatment, long-term condition prior to cancer, days from 1st symptom to diagnosis, number of GP visits before diagnosis.

Results from post hoc analysis excluding patients with bone tumours were similar to those for all cancers combined (Supplemental file, Table A2). A subgroup investigation of patients with lymphoma, the biggest diagnostic category, showed these were not significantly different from those for the group of other cancer types (Supplemental file, Table A3). Finally, sensitivity analyses using joint modelling for survival alongside longitudinal QOL did not alter the conclusion based on the main results (Supplemental file, Table A4).

## DISCUSSION

Our study is the first reported national longitudinal evaluation of specialist cancer services, more specifically TYA-PTCs and their networks of care, as they were originally defined in 2005[3]. We recorded patient outcomes to determine the influence of place of care, and after consultation with patients and professionals, selected QOL as the primary parameter of interest. Using routinely collected hospital admission data to identify time spent in the TYA-PTC, we categorised patients by the level of their care received in the TYA-PTC (all, none or some). We found that there was a statistically significant difference between these groups with those in the NO-TYA-PTC group having superior QOL compared to those in the ALL-TYA-PTC group, whilst those in the SOME-TYA-PTC group reported lowest QOL. Quality of life improved over time in all three groups, but rates of improvement were significantly better for SOME and ALL-TYA-PTC.

We predicted that sociodemographic or disease factors might explain some of the differences between groups and adjusted the analyses for these confounding variables. Despite extensive analysis we were unable to identify other factors to account for these differences. Like other reports of young people's QOL after a cancer diagnosis[22], we found this to be low, irrespective of where young people were treated. We found that young people who did not access a TYA-PTC had better QOL in comparison to those who had all or some of their care in a TYA-PTC. However, while this was statistically significant, the mean



Final version

1  
2  
3 difference between the NO-TYA-PTC and ALL-TYA-PTC groups was not at a level proposed  
4 as clinically significant (8-point difference[33]). Nevertheless, it is important to consider  
5 reasons for lower QOL when young people experience multiple types of place of care and  
6 the determinants of place of care. Based on work in other settings where care is delivered  
7 on multiple sites [40] we surmise that this may result from limited coordination of care,  
8 perhaps including inadequate communication with and between professionals. Having to  
9 repeat conversations and explanations of their cancer diagnosis and treatment details is  
10 frequently reported as burdensome to young people[6]. A greater understanding of the  
11 determinants of place of care for young people and the factors which influence a sense of  
12 care co-ordination deserve further exploration.  
13  
14  
15

16  
17 It is interesting that young people who had no access to the TYA-PTC rated their QOL the  
18 highest. This could reflect young people rating themselves by comparison with the other  
19 people they could see being treated for cancer outside of a TYA-PTC, including older adults.  
20 It could also be that young people chose to receive care locally rather than travel to the TYA-  
21 PTC so they could keep their links to their 'normal' life, which is supported by the domain  
22 level analysis where they also rated their work/school/college functioning higher.  
23 Alternatively, the strong emphasis placed on the unique issues faced by TYA with cancer by  
24 members of the TYA MDT staff may have heightened patients' awareness of these problems  
25 in comparison to the NO-TYA-PTC group, and consequently they lowered their perception of  
26 their QOL while the NO-TYA-PTC group remained comparatively unaware of such concerns.  
27 Future work could focus on the influence of being given a choice in the place where young  
28 people receive care, and the factors that young people consider to be important when  
29 making this decision.  
30  
31  
32

33  
34 The longest follow-up for longitudinal assessment of QOL previously reported to two years  
35 after diagnosis[23], which showed no improvement after the first year. However, we found  
36 that there was a gradual improvement in QOL over 3-years, which was more rapid when  
37 young people received all their care in a TYA-PTC. The philosophy of TYA cancer care  
38 includes the delivery of care to support young people to achieve their long-term personal  
39 outcomes (education, employment and relationships), the benefits of care provided by the  
40 TYA-PTC may therefore not be realised in the short-term. It would be beneficial for us to  
41 understand whether this improvement continued into long-term survivorship, especially the  
42 influence of QOL reaching and sustaining goals such as employment.  
43  
44  
45

46  
47 There are several limitations to this study including how specialist care was defined and  
48 measured. This was based on the location of the 13 NHS Trusts in England commissioned  
49 as TYA-PTCs but not the specific hospitals within these Trusts where the specialist TYA  
50 services were based. For example, a Trust which included multiple hospitals could only have  
51 specialist TYA services in one therefore a young person receiving care in one of the other  
52 hospitals was assumed to have had access to specialist TYA services, i.e., they were  
53 assigned to the ALL-TYA-PTC group rather than NO-TYA-PTC. Furthermore, using the Trust  
54 commissioned as a TYA-PTC does not capture the details of the TYA-specific care available  
55 or delivered and assumes that this is equal in all. We know there was wide variation in the  
56 delivery of care through the duration of the study[41]. However, at the time of study inception  
57 HES was the sole data source available that would allow an objective measurement of place  
58 of care. In complementary work, the key elements of specialist age-appropriate care for TYA  
59  
60

Final version

1  
2  
3 have been described[17]. This would provide an alternative categorisation against which to  
4 measure patient and clinical outcomes.  
5

6  
7 The cohort represented approximately a fifth of the total cancer population diagnosed  
8 between July 2012 and December 2014 as ascertained through the National Cancer  
9 Registration and Analysis Service, and there were differences in cancer types between the  
10 cohort and those not recruited[25], which could impact on the generalisability of the results.  
11 For example, the cohort included a higher proportion of young people with germ cell tumours  
12 and lymphoma, but a lower proportion of carcinoma and skin cancers. We used a single  
13 mode of survey administration at wave 1, and multiple modes at waves 2-5. While this may  
14 have introduced a social desirability bias (noted to be more so for telephone interviews than  
15 web-based surveys[42]), this was to increase the response rate as work during the feasibility  
16 study for BRIGHTLIGHT indicated no one method was acceptable to all young people.  
17 Finally, we used a measure of QOL that was validated across the age 13-24 years[37], but  
18 this may not reflect the issues that were most relevant to young people with cancer in the UK  
19 (having been developed in the US in a non-cancer population). This is supported by  
20 comments made in the cognitive interviews undertaken when the survey was being  
21 developed; young people did not agree with the wording of the school functioning domain,  
22 so this was changed to work/school/college[24]. However, young people who were not in  
23 education, employment or training would not be able to answer these questions. Future work  
24 is required to develop TYA-specific QOL measures that reflect issues specific to this  
25 population.  
26  
27  
28  
29

30  
31 Despite these limitations this is the first systematic prospective evaluation of specialist  
32 services for young people with cancer. We have found that TYA cancer care as  
33 commissioned in 2010 resulted in young people's QOL gradually improving 3-years after  
34 diagnosis and improving more rapidly from a lower baseline if young people's treatment  
35 involved a TYA-PTC. NHS care pathways may result in care in specialist centres for young  
36 people with the poorest initial QOL, and local care for those with the least poor initial QOL,  
37 risk stratifying the patients appropriately. Young people who receive some care in both a  
38 children's or adult cancer unit and at a TYA-PTC also have an improvement in QOL, but the  
39 rate of improvement was less and QOL remained lower than for young people treated in a  
40 single type of organisation. The factors influencing place of care and the differences in QOL  
41 and survival remain unclear. A model of 'joint care', increasing the emphasis and investment  
42 in communication between TYA-PTCs and other Trusts designated to deliver elements of  
43 TYA cancer care, is currently proposed by the NHS in England. The influence of such  
44 changes in care provision should be examined prospectively in future to identify if QOL of  
45 young people with cancer is improved wherever care is received.  
46  
47  
48  
49

## 50 REFERENCES

- 51
- 52
- 53 1. Barr RD. Adolescents, young adults, and cancer—the international challenge, *Cancer*  
54 2011;117:2245-9.
- 55 2. Wang Y, Zhou S, Yang F, et al. Treatment-Related Adverse Events of PD-1 and PD-  
56 L1 Inhibitors in Clinical Trials: A Systematic Review and Meta-analysis. *JAMA*  
57 *Oncology* 2019;5:1008-19.
- 58 3. National Institute for Health and Care Excellence. Guidance on cancer services:  
59 improving outcomes in children and young people with cancer. NICE, London 2005  
60

Final version

- 1
- 2
- 3
- 4 <https://www.nice.org.uk/guidance/csg7/resources/improving-outcomes-in-children-and-young-people-with-cancer-update-773378893> [Accessed 05/08/20]
- 5
- 6 4. Stark D, Bielack S, Brugieres L, et al. Teenagers and young adults with cancer in
- 7 Europe: from national programmes to a European integrated coordinated project.
- 8 *European Journal of Cancer Care* 2016;25:419-27.
- 9
- 10 5. Barr RD. Planning a Comprehensive Program in Adolescent and Young Adult
- 11 Oncology-A Collision with Reality. *Journal of Adolescent & Young Adult Oncology*
- 12 2016;5:303-9.
- 13
- 14 6. Fern L, Taylor RM, Whelan J, et al. 'The art of age appropriate care': using
- 15 participatory research to describe young people's experience of cancer, *Cancer*
- 16 *Nursing*. 2013;36:E27-38.
- 17
- 18 7. Morgan S, Davies S, Palmer S, et al. Sex, drugs and rock 'n' roll: caring for
- 19 adolescents and young adults with cancer, *J Clin Oncol* 2010;28:4825-30.
- 20
- 21 8. Sironi G, Barr RD, Ferrari A. Models of Care-There Is More Than One Way to Deliver,
- 22 *Cancer Journal* 2018;24:315-20.
- 23
- 24 9. Taylor RM, Fern L, Millington H, et al. "Your place or mine?" Priorities for a specialist
- 25 teenage and young adult (TYA) cancer unit: disparity between TYA and professional
- 26 perceptions, *Journal of Adolescent and Young Adult Oncology* 2011;1:145-51.
- 27
- 28 10. Rae CS, Pole JD, Gupta S, et al. Development of System Performance Indicators for
- 29 Adolescent and Young Adult Cancer Care and Control in Canada. *Value in Health*
- 30 2020;23:74-88.
- 31
- 32 11. Whiteson M. The Teenage Cancer Trust-advocating a model for teenage cancer
- 33 services, *European Journal of Cancer* 2003;39:2688-93.
- 34
- 35 12. Osborn M, Johnson R, Thompson K, et al. Models of care for adolescent and young
- 36 adult cancer programs, *Pediatric Blood & Cancer* 2019;66:e27991.
- 37
- 38 13. Smith AW, Bellizzi KM, Keegan THM, et al. Health-related quality of life of adolescent
- 39 and young adult patients with cancer in the United States: the adolescent and young
- 40 adult Health Outcomes and Patient Experience study, *Journal of Clinical Oncology*
- 41 2013;31:2136-46.
- 42
- 43 14. Department of Health. The NHS Constitution: the NHS belongs to us all. London: DoH
- 44 2015.
- 45
- 46 15. Henderson R. What is the NHS? An introduction to the NHS. ;2020.
- 47
- 48 16. O'Hara C, Khan M, McCabe M, et al. Notifications of teenagers and young adults with
- 49 cancer to a principal treatment centre 2009-2010. National Cancer Intelligence
- 50 Network 2013 <http://www.ncin.org.uk/view?rid=2124> [Accessed 05/08/20].
- 51
- 52 17. Lea S, Taylor RM, Martins A, et al. Conceptualising age-appropriate care for teenagers
- 53 and young adults with cancer: a qualitative mixed methods study, *Adolescent Health*
- 54 *Medicine and Therapeutics* 2018;9:149-66.
- 55
- 56 18. Taylor RM, Feltbower RG, Aslam N, et al. Modified international e-Delphi survey to
- 57 define healthcare professional competencies for working with teenagers and young
- 58 adults with cancer. *BMJ Open* 2016;6:e011361.
- 59
- 60 19. Gibson F, Fern L, Whelan J, et al. A scoping exercise of favourable characteristics of
- professionals working in teenage and young adult cancer care: 'thinking outside of the
- box', *Eur J Cancer Care* 2012;21:330-9.
20. Taylor RM, Whelan JS, Gibson F, et al. Involving young people in BRIGHTLIGHT from
- study inception to secondary data analysis: insights from 10 years of user involvement,
- Research Involvement and Engagement* 2018;4:50.

Final version

- 1
  - 2
  - 3
  - 4
  - 5
  - 6
  - 7
  - 8
  - 9
  - 10
  - 11
  - 12
  - 13
  - 14
  - 15
  - 16
  - 17
  - 18
  - 19
  - 20
  - 21
  - 22
  - 23
  - 24
  - 25
  - 26
  - 27
  - 28
  - 29
  - 30
  - 31
  - 32
  - 33
  - 34
  - 35
  - 36
  - 37
  - 38
  - 39
  - 40
  - 41
  - 42
  - 43
  - 44
  - 45
  - 46
  - 47
  - 48
  - 49
  - 50
  - 51
  - 52
  - 53
  - 54
  - 55
  - 56
  - 57
  - 58
  - 59
  - 60
21. Taylor RM, Gibson F, Franck LS. A concept analysis of health-related quality of life in young people with chronic illness, *J Clin Nurs* 2008;17:1823-33.
22. Quinn GP, Goncalves V, Sehovic I, et al. Quality of life in adolescent and young adult cancer patients: a systematic review of the literature, *Patient Related Outcome Measures* 2015;6:19-51.
23. Husson O, Zebrack BJ, Block R, et al. Health-Related Quality of Life in Adolescent and Young Adult Patients with Cancer: A Longitudinal Study. *Journal of Clinical Oncology* 2017;35:652-9.
24. Taylor RM, Fern LA, Solanki A, et al. Development and validation of the BRIGHTLIGHT Survey, a patient-reported experience measure for young people with cancer, *Health and Quality of Life Outcomes* 2015;13:107.
25. Taylor RM, Fern LA, Barber JA, et al. Description of the BRIGHTLIGHT Cohort: the evaluation of teenagers and young adult cancer services in England, *BMJ Open* 2019;9:e027797.
26. Taylor RM, Aslam N, Lea S, et al. Optimizing a retention strategy with young people for BRIGHTLIGHT, a longitudinal cohort study examining the value of specialist cancer care for young people, *Journal of Adolescent and Young Adult Oncology* 2017;6:459-69.
27. Taylor RM, Mohain J, Gibson F, et al. Novel participatory methods of involving patients in research: naming and branding a longitudinal cohort study, BRIGHTLIGHT, *BMC Medical Research Methodology* 2015;15:20.
28. Taylor RM, Solanki A, Aslam N, et al. A participatory study of teenagers and young adults views on access and participation in cancer research, *European Journal of Oncology Nursing* 2016;20:156-64.
29. Martins A, Taylor RM, Lobel B, et al. Sex, body image and relationships- information and support needs of adolescents and young adults: BRIGHTLIGHT, *Journal of Adolescent and Young Adult Oncology* 2018;https://doi.org/10.1089/jayao.2018.0025.
30. Taylor RM, Lobel B, Thompson K, et al. BRIGHTLIGHT researchers as 'dramaturgs': creating There is a Light from complex research data, *Research Involvement and Engagement* 2020;in press.
31. Kenten C, Martins A, Fern LA, et al. Qualitative study to understand the barriers to recruiting young people with cancer to BRIGHTLIGHT: a national cohort study in England, *BMJ Open* 2017;7:e01829.
32. Varni JW, Burwinkle TM, Seid M, et al. The PedsQL (TM) 4.0 as a pediatric population health measure: Feasibility, reliability and validity, *Ambulatory Pediatrics* 2003;3:329-41.
33. Varni J, Burwinkle T, Katz E, et al. The PedsQL in Pediatric Cancer: Reliability and validity of the Pediatric Quality of Life Inventory Generic Core Scales, Multidimensional Fatigue Scale, and Cancer Module, *Cancer* 2002;94:2090-106.
34. Fredericks EM, Magee JC, Oipari-Arrigan L, et al. Adherence and health-related quality of life in adolescent liver transplant recipients, *Pediatr Transplant* 2008;12:289-99.
35. King M, Jones L, Richardson A, et al. The relationship between patients' experiences of continuity of cancer care and health outcomes: a mixed methods study, *Br J Cancer* 2008;98:529-36.
36. Hsieh FY, Bloch DA, Larsen MD. Simple method of sample size calculation for linear and logistic regression, *Stat Med* 1998;17:1623-34.

Final version

- 1
  - 2
  - 3
  - 4
  - 5
  - 6
  - 7
  - 8
  - 9
  - 10
  - 11
  - 12
  - 13
  - 14
  - 15
  - 16
  - 17
  - 18
  - 19
  - 20
  - 21
  - 22
  - 23
  - 24
  - 25
  - 26
  - 27
  - 28
  - 29
  - 30
  - 31
  - 32
  - 33
  - 34
  - 35
  - 36
  - 37
  - 38
  - 39
  - 40
  - 41
  - 42
  - 43
  - 44
  - 45
  - 46
  - 47
  - 48
  - 49
  - 50
  - 51
  - 52
  - 53
  - 54
  - 55
  - 56
  - 57
  - 58
  - 59
  - 60
37. Varni JW, Limbers CA. The PedsQL4.0 generic core scales young adult version: feasibility, reliability and validity in a university student population, *Journal of Health Psychology* 2009;14:611-22.
38. Department for Communities and Local Government. The English Indices of Deprivation 2015 Statistical Release. England: Department for Communities and Local Government 2015.
39. Henderson R, Diggle P, Dobson A. Joint modelling of longitudinal measurements and event time data. *Biostatistics* 2000;1:465-80.
40. Fulop NJ, Ramsay AIG, Perry C, et al. Explaining outcomes in major system change: a qualitative study of implementing centralised acute stroke services in two large metropolitan regions in England. *Implementation Science* 2016;11:80.
41. Vindrola-Padros C, Taylor RM, Lea S, et al. Mapping Adolescent Cancer Services: How Do Young People, Their Families, and Staff Describe Specialized Cancer Care in England?. *Cancer Nurs* 2016;39:358-66.
42. Kreuter F, Presser S, Tourangeau R. Social desirability bias in CATI, IVR, and web surveys: the effects of mode and question sensitivity, *Public Opinion Quarterly* 2008;72:847-65.

#### Author contributions:

RMT, LAF, JB, DS, SM, RF, LH, FG, RR, JSW were involved in developing the protocol. RMT coordinated the running of the study and was responsible for data acquisition. JB, JGA, RMT, LAF, SM, SL, AM, RF, DS, JSW contributed to the analysis. All authors critically revised and approved the final manuscript.

#### Acknowledgements:

We would like to thank the members of our Young Advisory Panel (Zeena Beale, Ciaran Fenton, Emily Freemantle, Jaasjan Guvindia, Laura Haddard, Steph Hammersley, Amy Lang, Joshua Lerner, Tanya Loughlin, Jason, Sin Jin Loo, Jennifer Miller, Maria Onasanya, Arif Nasir, Steph Still, Poppy Richards, Amy Riley, Lara Veitch, Freya Voss, JJ Wheeler, Max Williamson, Antonia Young), the 1,114 young people who consented to participate in BRIGHTLIGHT, healthcare professionals who approached and consented young people, and ex-members of the team who have contributed to study management (Catherine O'Hara, Anita Solanki, Natasha Aslam, Zuwena Fox).

We would like to dedicate this manuscript in memory of Mr Stephen Sutton and Mr Mathew Cook who were instrumental to study set up, design and management. Both of whom died from their cancer during the study.

We would also like to thank the following for all their support with recruitment to BRIGHTLIGHT: the National Cancer Research Institute, especially Dr Eileen Loucaides and the Secretariat; Matt Seymour, Matt Cooper and Karen Poole at the former National Cancer Research Network; Maria Khan and Sabrina Sandhu (North West Knowledge Intelligence Team); TYAC; Teenage Cancer Trust; CLIC Sargent; Ipsos MORI; Quality Health and the research teams at 109 NHS Trusts in England who opened BRIGHTLIGHT to recruitment.

Final version

1  
2  
3 Principal Investigators agreeing to be acknowledged for their contribution to BRIGHTLIGHT  
4 recruitment:

5 Claire Hemmaway, Barking, Havering and Redbridge Hospitals NHS Trust; Anita Amadi,  
6 Barnet and Chase Farm Hospitals NHS Trust; Keith Elliott, Barnsley Hospital NHS  
7 Foundation Trust; Leanne Smith, Blackpool, Fylde and Wyre Hospitals NHS Trust; Shirley  
8 Cocks, Bolton NHS Foundation Trust; Victoria Drew, Bradford Teaching Hospitals NHS  
9 Foundation Trust; Elizabeth Pask, Central Manchester University Hospitals NHS Foundation  
10 Trust; Anne Littley, Central Manchester University Hospitals NHS Foundation Trust; Mark  
11 Bower, Chelsea and Westminster Hospital NHS Trust; Scott Marshall, City Hospitals  
12 Sunderland NHS Foundation Trust; Lorna Dewar, Colchester Hospital University NHS Trust;  
13 Nnenna Osuji, Croydon Health Services NHS Trust; David Allotey, Derby Hospitals NHS  
14 Foundation Trust; Karen Jewers, East Lancashire Hospitals NHS Trust; Asha Johny,  
15 Gloucestershire Hospitals NHS Foundation Trust; Nicola Knightly, Great Western Hospitals  
16 NHS Foundation Trust; Robert Carr, Guy's & St Thomas' Hospital NHS Foundation Trust;  
17 Alison Milne, Hampshire Hospitals NHS Foundation Trust; Claire Hall, Harrogate and District  
18 NHS Foundation Trust; James Bailey, Hull and East Yorkshire Hospitals NHS Trust;  
19 Christine Garlick, Ipswich Hospital NHS Foundation Trust; Alison Brown, Isle of Wight  
20 Healthcare NHS Trust; Carolyn Hatch, Lancashire Teaching Hospitals NHS Foundation  
21 Trust; Vivienne E. Andrews, Medway NHS Foundation Trust; Sara Greig, Milton Keynes  
22 Hospital NHS Foundation Trust; Jennifer Wimperis, Norfolk and Norwich University Hospital  
23 NHS Trust; Suriya Kirkpatrick, North Bristol NHS Trust; Jonathan Nicoll, North Cumbria  
24 University Hospitals NHS Trust; Ivo Hennig, Nottingham University Hospitals NHS Trust;  
25 Karen Sherbourne, Oxford Radcliffe Hospital NHS Trust; Clare Turner, Plymouth Hospitals  
26 NHS Trust; Claire Palles-Clark, Royal Surrey County Hospital NHS Trust; Christine Cox,  
27 Royal United Hospital Bath NHS Trust; Yeng Ang, Salford Royal NHS Foundation Trust;  
28 Jonathan Cullis, Salisbury NHS Foundation Trust; Daniel Yeomanson, Sheffield Children's  
29 NHS Foundation Trust; Ruth Logan, Sheffield Teaching Hospitals NHS Foundation Trust;  
30 Deborah Turner, South Devon Healthcare NHS Trust; Dianne Plews, South Tees Hospitals  
31 NHS Trust; Julia Jonasi, Southend University Hospital NHS Foundation Trust; Ruth  
32 Pettengell, St George's Healthcare NHS Trust; Kamal Khoobarry, Surrey & Sussex  
33 Healthcare NHS Trust; Angela Watts, The Dudley Group of Hospitals NHS Foundation Trust;  
34 Louise Soanes, The Royal Marsden NHS Foundation Trust; Claudette Jones, The Royal  
35 Orthopaedic Hospital NHS Trust; Michael Jenkinson, The Walton Centre for Neurology and  
36 Neurosurgery NHS Trust; Nicky Pettitt, University Hospital Birmingham NHS Foundation  
37 Trust; Vijay Agarwal, University Hospital Birmingham NHS Foundation Trust; Beth Harrison,  
38 University Hospitals Coventry and Warwickshire NHS Trust; Fiona Miall, University Hospitals  
39 of Leicester NHS Trust; Gail Wiley, University Hospitals of Morecambe Bay NHS Trust;  
40 Lynda Wagstaff, Walsall Hospitals NHS Trust; Fiona Smith, West Hertfordshire Hospitals  
41 NHS Trust; Sarah Janes, Western Sussex NHS Trust; Serena Hillman, Weston Area Health  
42 NHS Trust; Christopher Zaborowski, Yeovil District Hospital NHS Foundation Trust.

52  
53 Data for this study is based on information collected and quality assured by the PHE  
54 National Cancer Registration and Analysis Service. Access to the data was facilitated by the  
55 PHE Office for Data Release.

56  
57 The Quality of Life study described in this paper was carried out using the PedsQL,  
58 developed by Dr James W. Varni.  
59  
60

Final version

1  
2  
3 Competing interests:  
4 None declared.  
5  
6

7 Ethics Approval:

8 The study was approved by the Health Research Authority Confidentiality Advisory Group  
9 (reference ECC 8-05(d)/2011) and London Bloomsbury NHS Research Ethics Committee  
10 (reference LO/11/1718).  
11  
12

13 Funding:

14 This paper presents independent research funded by the National Institute for Health  
15 Research (NIHR) under its Programme Grants for Applied Research Programme (Grant  
16 Reference Number RP-PG-1209-10013). The views expressed are those of the author(s)  
17 and not necessarily those of the NHS, the NIHR or the Department of Health. The  
18 BRIGHTLIGHT Team acknowledges the support of the NIHR, through the Cancer Research  
19 Network.  
20  
21

22 LAF and LH are funded by Teenage Cancer Trust, DS holds research grant funding from  
23 Teenage Cancer Trust, and RR was (in part) supported by the National Institute for Health  
24 Research (NIHR) Collaboration for Leadership in Applied Health Research and Care  
25 (CLAHRC) North Thames at Bart's Health NHS Trust. RMT is a National Institute for Health  
26 Research (NIHR) Senior Nurse Research Leader. The views expressed in this article are  
27 those of the author and not necessarily those of the NIHR, or the Department of Health and  
28 Social Care. None of the funding bodies have been involved with study concept, design or  
29 decision to submit the manuscript. JAG was subsidised by the Ramon & Cajal programme  
30 operated by the Ministry of Economy and Business (RYC-2016-19353), and the European  
31 Social Fund.  
32  
33  
34  
35

36 Data sharing statement:

37 Further details of the BRIGHTLIGHT programme of work are available through the study  
38 website ([www.brightlightstudy.com](http://www.brightlightstudy.com)). Data that are not held under licence with Public Health  
39 England or NHS Digital will be available from late 2020 when the primary analysis is  
40 complete. We welcome collaboration, for general data sharing enquiries please contact RMT  
41 ([rtaylor13@nhs.net](mailto:rtaylor13@nhs.net)).  
42  
43  
44  
45  
46  
47  
48  
49  
50  
51  
52  
53  
54  
55  
56  
57  
58  
59  
60

Final version

## Figure legends

### Figure 1: Participation at each wave of data collection

\*Drop-outs between waves due to death, permanent optout or wave opt-out. Wave opt-outs prior to being issued were not permanent opt-outs; participants could opt-out of a single wave but participate in subsequent waves; these cases were not removed from the cohort permanently.

### Figure 2: Mean PedsQL total score over time since diagnosis (with 95% confidence intervals)

Graph based on data collected in Waves 1 to 5, plotted against median time since diagnosis.

### Figure 3: Subgroup investigations for cancer type (leukaemia/lymphoma v other) and age group (<19 v 19+): Results from adjusted\* random effects models with interaction terms (N=733)

\* model with a random effect for city and adjustment for time since diagnosis, age at diagnosis, type of cancer, socioeconomic status, severity of cancer, ethnicity, Choice about where to receive treatment, Long term condition prior to cancer, days from 1st symptom to diagnosis, number of GP visits before diagnosis.

### Figure 4: Mean PedsQL physical functioning domain scores over time since diagnosis (with 95% confidence intervals)

(Graphs based on data collected in Waves 1 to 5, plotted against median time since diagnosis.)

### Figure 5: Mean PedsQL emotional functioning domain scores over time since diagnosis (with 95% confidence intervals)

(Graphs based on data collected in Waves 1 to 5, plotted against median time since diagnosis.)

### Figure 6: Mean PedsQL social functioning domain scores over time since diagnosis (with 95% confidence intervals)

(Graphs based on data collected in Waves 1 to 5, plotted against median time since diagnosis.)

### Figure 7: Mean PedsQL work/school/college functioning domain scores over time since diagnosis (with 95% confidence intervals)

(Graphs based on data collected in Waves 1 to 5, plotted against median time since diagnosis.)

### Figure 8: Mean PedsQL Psychosocial summary score scores over time since diagnosis (with 95% confidence intervals)

(Graphs based on data collected in Waves 1 to 5, plotted against median time since diagnosis.)



1  
2  
3  
4  
5  
6  
7  
8  
9  
10  
11  
12  
13  
14  
15  
16  
17  
18  
19  
20  
21  
22  
23  
24  
25  
26  
27  
28  
29  
30  
31  
32  
33  
34  
35  
36  
37  
38  
39  
40  
41  
42  
43  
44  
45  
46  
47  
48  
49  
50  
51  
52  
53  
54  
55  
56  
57  
58  
59  
60



85x108mm (300 x 300 DPI)



279x203mm (300 x 300 DPI)

1  
2  
3  
4  
5  
6  
7  
8  
9  
10  
11  
12  
13  
14  
15  
16  
17  
18  
19  
20  
21  
22  
23  
24  
25  
26  
27  
28  
29  
30  
31  
32  
33  
34  
35  
36  
37  
38  
39  
40  
41  
42  
43  
44  
45  
46  
47  
48  
49  
50  
51  
52  
53  
54  
55  
56  
57  
58  
59  
60

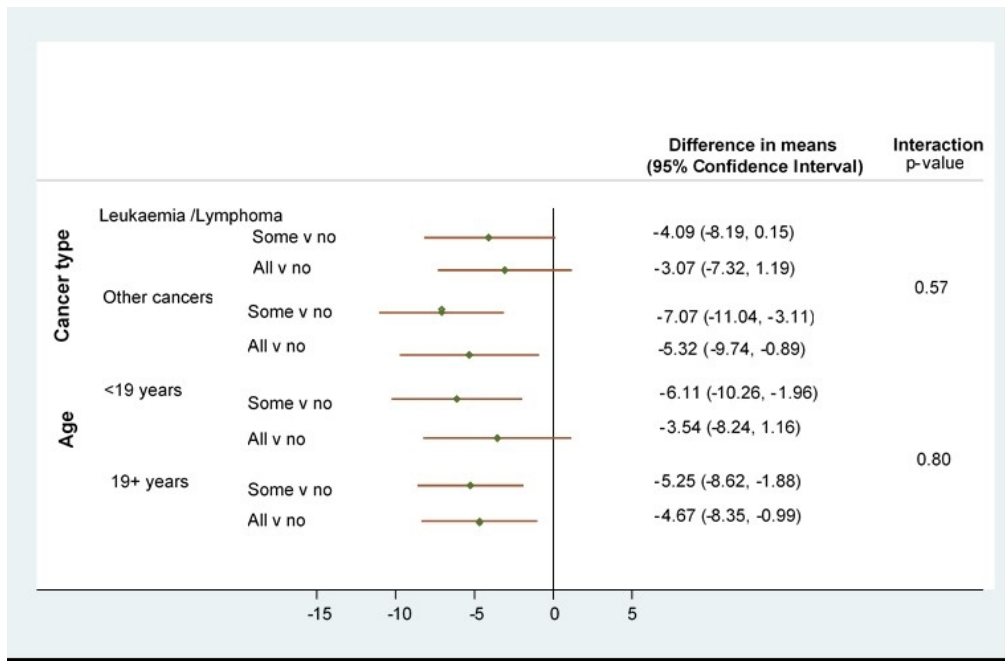

63x41mm (300 x 300 DPI)

1  
2  
3  
4  
5  
6  
7  
8  
9  
10  
11  
12  
13  
14  
15  
16  
17  
18  
19  
20  
21  
22  
23  
24  
25  
26  
27  
28  
29  
30  
31  
32  
33  
34  
35  
36  
37  
38  
39  
40  
41  
42  
43  
44  
45  
46  
47  
48  
49  
50  
51  
52  
53  
54  
55  
56  
57  
58  
59  
60



279x203mm (300 x 300 DPI)

1  
2  
3  
4  
5  
6  
7  
8  
9  
10  
11  
12  
13  
14  
15  
16  
17  
18  
19  
20  
21  
22  
23  
24  
25  
26  
27  
28  
29  
30  
31  
32  
33  
34  
35  
36  
37  
38  
39  
40  
41  
42  
43  
44  
45  
46  
47  
48  
49  
50  
51  
52  
53  
54  
55  
56  
57  
58  
59  
60



279x203mm (300 x 300 DPI)



279x203mm (300 x 300 DPI)

1  
2  
3  
4  
5  
6  
7  
8  
9  
10  
11  
12  
13  
14  
15  
16  
17  
18  
19  
20  
21  
22  
23  
24  
25  
26  
27  
28  
29  
30  
31  
32  
33  
34  
35  
36  
37  
38  
39  
40  
41  
42  
43  
44  
45  
46  
47  
48  
49  
50  
51  
52  
53  
54  
55  
56  
57  
58  
59  
60



279x203mm (300 x 300 DPI)

1  
2  
3  
4  
5  
6  
7  
8  
9  
10  
11  
12  
13  
14  
15  
16  
17  
18  
19  
20  
21  
22  
23  
24  
25  
26  
27  
28  
29  
30  
31  
32  
33  
34  
35  
36  
37  
38  
39  
40  
41  
42  
43  
44  
45  
46  
47  
48  
49  
50  
51  
52  
53  
54  
55  
56  
57  
58  
59  
60



279x203mm (300 x 300 DPI)



1  
2  
3  
4  
5  
6  
7  
8  
9  
10  
11  
12  
13  
14  
15  
16  
17  
18  
19  
20  
21  
22  
23  
24  
25  
26  
27  
28  
29  
30  
31  
32  
33  
34  
35  
36  
37  
38  
39  
40  
41  
42  
43  
44  
45  
46

Supplemental file

Figure A1: Matrix representing the causal diagram explaining confounding variable to enter in the Directed Acyclic Graph (DAG)

|           | TYA SCL | QOL | Age | Choice | CS | CT | DoH | Ethnicity | Finances | Gender | Geography | I&C | LTC | RtD | SE | SES | SS | Treatment |
|-----------|---------|-----|-----|--------|----|----|-----|-----------|----------|--------|-----------|-----|-----|-----|----|-----|----|-----------|
| TYA SCL   |         | ↗   | ↘   | ↘      | ↘  | ↘  | ↘   | ↘         | ↘        | O      | ↘         | ↘   | ↘   | ↘   | ↘  | ↘   | ↘  | ↘         |
| QOL       |         |     | ↘   | ↘      | ↘  | ↘  | ↘   | ↘         | ↘        | ↘      | ↘         | ↘   | ↘   | ↘   | ↘  | ↘   | ↘  | ↘         |
| Age       |         |     |     | ↘      | O  | ↘  | ↘   | O         | ↘        | O      | O         | ↘   | ↘   | ↘   | ↘  | ↘   | ↘  | ↘         |
| Choice    |         |     |     |        | ↘  | ↘  | O   | ↘         | ↘        | O      | ↘         | ↘   | ↘   | ↘   | ↘  | ↘   | ↘  | ↘         |
| CS        |         |     |     |        |    | ↘  | ↘   | ↘         | ↘        | O      | ↘         | ↘   | ↘   | ↘   | ↘  | ↘   | ↘  | ↘         |
| CT        |         |     |     |        |    |    | ↘   | ↘         | ↘        | ↘      | ↘         | ↘   | ↘   | ↘   | ↘  | ↘   | ↘  | ↘         |
| DoH       |         |     |     |        |    |    |     | ↘         | ↘        | ↘      | ↘         | ↘   | ↘   | ↘   | ↘  | ↘   | ↘  | ↘         |
| Ethnicity |         |     |     |        |    |    |     |           | ↘        | O      | ↘         | ↘   | ↘   | ↘   | ↘  | ↘   | ↘  | ↘         |
| Finances  |         |     |     |        |    |    |     |           |          | O      | ↘         | ↘   | ↘   | ↘   | O  | ↘   | ↘  | ↘         |
| Gender    |         |     |     |        |    |    |     |           |          |        |           | O   | ↘   | ↘   | ↘  | O   | ↘  | ↘         |
| Geography |         |     |     |        |    |    |     |           |          |        |           |     | ↘   | ↘   | ↘  | ↘   | ↘  | ↘         |
| I&C       |         |     |     |        |    |    |     |           |          |        |           |     | ↘   | ↘   | ↘  | ↘   | ↘  | ↘         |
| LTC       |         |     |     |        |    |    |     |           |          |        |           |     |     | ↘   | ↘  | ↘   | ↘  | ↘         |
| RtD       |         |     |     |        |    |    |     |           |          |        |           |     |     |     | ↘  | ↘   | ↘  | ↘         |
| SE        |         |     |     |        |    |    |     |           |          |        |           |     |     |     |    | ↘   | ↘  | ↘         |
| SES       |         |     |     |        |    |    |     |           |          |        |           |     |     |     |    |     | ↘  | ↘         |
| SS        |         |     |     |        |    |    |     |           |          |        |           |     |     |     |    |     |    | ↘         |
| Treatment |         |     |     |        |    |    |     |           |          |        |           |     |     |     |    |     |    |           |

CS: cancer severity; CT: cancer type; DoH: duration of hospitalisation; I&C: information & communication; LTC: long-term condition; QOL: quality of life; RtD: route to diagnosis; SE: symptom experience; SES: socioeconomic status; SS: social support  
O – indicates a null relationship

Table A1: PedsQL total score by Wave of data collection

|        | NO-TYA-PTC |               |                        | SOME-TYA-PTC |               |                        | ALL-TYA-PTC |               |                        |
|--------|------------|---------------|------------------------|--------------|---------------|------------------------|-------------|---------------|------------------------|
|        | N          | Mean (SD)     | Median (IQR)           | N            | Mean (SD)     | Median (IQR)           | N           | Mean (SD)     | Median (IQR)           |
| Wave 1 | 276        | 71.44 (19.68) | 73.22 (57.61 to 89.13) | 312          | 60.79 (18.79) | 59.71 (47.52 to 75.00) | 193         | 65.44 (19.07) | 66.30 (52.78 to 80.56) |
| Wave 2 | 173        | 77.55 (19.31) | 83.70 (61.96 to 93.48) | 209          | 69.46 (19.45) | 71.74 (54.35 to 85.87) | 122         | 73.50 (19.08) | 77.17 (58.33 to 88.04) |
| Wave 3 | 126        | 79.62 (20.38) | 85.87 (68.48 to 95.65) | 164          | 71.33 (18.91) | 73.76 (59.75 to 84.78) | 99          | 74.55 (19.26) | 80.43 (59.72 to 91.30) |
| Wave 4 | 121        | 78.21 (21.16) | 84.78 (64.13 to 95.65) | 118          | 73.30 (33.33) | 76.24 (60.87 to 86.96) | 98          | 75.90 (21.27) | 82.61 (61.96 to 93.48) |
| Wave 5 | 103        | 80.71 (18.75) | 86.96 (71.74 to 95.65) | 113          | 76.21 (18.90) | 78.26 (65.22 to 93.48) | 75          | 79.70 (16.78) | 85.87 (70.65 to 91.30) |

Table A2: Results from adjusted mixed effects models investigating the relationship between levels of TYA care received during the first 12 months from diagnosis and the quality of life – excluding bone cancer (N=667)

|                                  |              | Difference in means | 95% Confidence Interval | P-value  |
|----------------------------------|--------------|---------------------|-------------------------|----------|
| TYA care category (v NO-TYA-PTC) | SOME-TYA-PTC | -6.02               | -9.02 to -3.02          | P=0.0003 |
|                                  | ALL-TYA-PTC  | -4.53               | -7.72 to -1.35          |          |

\* results from a three level model for repeated measurements of QOL over time since diagnosis, with a random effect for city and adjustment for time since diagnosis, age at diagnosis, type of cancer, socioeconomic status, severity of cancer, ethnicity, choice about where to receive treatment, long-term condition prior to cancer, days from 1<sup>st</sup> symptom to diagnosis, number of GP visits before diagnosis.

Table A3: Subgroup investigation for lymphoma v other cancer: Results from adjusted\* mixed effects models with interaction terms (N=733)

|                    | <b>TYA care category</b>  | <b>Adjusted difference in means</b> | <b>95% confidence interval</b> | <b>P-value from interaction</b> |
|--------------------|---------------------------|-------------------------------------|--------------------------------|---------------------------------|
| <b>Cancer type</b> |                           |                                     |                                |                                 |
| Lymphoma           | SOME-TYA-PTC v NO-TYA-PTC | -6.01                               | -9.58 to -2.44                 | 0.90                            |
|                    | ALL-TYA-PTC v NO-TYA-PTC  | -4.13                               | -8.08 to -0.17                 |                                 |
| All other cancers  | SOME-TYA-PTC v NO-TYA-PTC | -4.89                               | -9.63 to -0.16                 |                                 |
|                    | ALL-TYA-PTC v NO-TYA-PTC  | -4.31                               | -9.18 to 0.55                  |                                 |

\* model with a random effect for city and adjustment for time since diagnosis, age at diagnosis, type of cancer, socioeconomic status, severity of cancer, ethnicity, choice about where to receive treatment, long-term condition prior to cancer, days from 1<sup>st</sup> symptom to diagnosis, number of GP visits before diagnosis.

Table A4: Results from a joint model of longitudinal quality of life scores and survival investigating their relationship with level of TYA care received during the first 12 months from diagnosis (N=733)\*

|                                  |              | <b>Difference in means</b> | <b>95% Confidence Interval</b> |
|----------------------------------|--------------|----------------------------|--------------------------------|
| TYA care category (v NO-TYA-PTC) | SOME-TYA-PTC | -6.45                      | -9.34 to -3.56                 |
|                                  | ALL-TYA-PTC  | -6.11                      | -9.58 to -2.64                 |

\* Models fitted using Stata command *stjm* with a Weibull submodel for survival (reference: M Crowther, K Abrams, P Lambert. Joint modelling of longitudinal and survival data. The Stata Journal (2013) 13, Number 1, pp. 165–184) Adjustment for time since diagnosis, age at diagnosis, type of cancer, socioeconomic status, severity of cancer, ethnicity, choice about where to receive treatment, long-term condition prior to cancer, days from 1<sup>st</sup> symptom to diagnosis, number of GP visits before diagnosis and city (as a fixed effect as a three level model could not be fitted).

**STROBE 2007 (v4) Statement—Checklist of items that should be included in reports of *cohort studies***

| Section/Topic                | Item # | Recommendation                                                                                                                                                                       | Reported on page #              |
|------------------------------|--------|--------------------------------------------------------------------------------------------------------------------------------------------------------------------------------------|---------------------------------|
| <b>Title and abstract</b>    | 1      | (a) Indicate the study's design with a commonly used term in the title or the abstract                                                                                               | 1                               |
|                              |        | (b) Provide in the abstract an informative and balanced summary of what was done and what was found                                                                                  | 2-3                             |
| <b>Introduction</b>          |        |                                                                                                                                                                                      |                                 |
| Background/rationale         | 2      | Explain the scientific background and rationale for the investigation being reported                                                                                                 | 3-4                             |
| Objectives                   | 3      | State specific objectives, including any prespecified hypotheses                                                                                                                     | 4                               |
| <b>Methods</b>               |        |                                                                                                                                                                                      |                                 |
| Study design                 | 4      | Present key elements of study design early in the paper                                                                                                                              | 4                               |
| Setting                      | 5      | Describe the setting, locations, and relevant dates, including periods of recruitment, exposure, follow-up, and data collection                                                      | 5                               |
| Participants                 | 6      | (a) Give the eligibility criteria, and the sources and methods of selection of participants. Describe methods of follow-up                                                           | 5 (reference cited for details) |
|                              |        | (b) For matched studies, give matching criteria and number of exposed and unexposed                                                                                                  | na                              |
| Variables                    | 7      | Clearly define all outcomes, exposures, predictors, potential confounders, and effect modifiers. Give diagnostic criteria, if applicable                                             | 5                               |
| Data sources/<br>measurement | 8*     | For each variable of interest, give sources of data and details of methods of assessment (measurement). Describe comparability of assessment methods if there is more than one group | 5                               |
| Bias                         | 9      | Describe any efforts to address potential sources of bias                                                                                                                            | 6                               |
| Study size                   | 10     | Explain how the study size was arrived at                                                                                                                                            | 5                               |
| Quantitative variables       | 11     | Explain how quantitative variables were handled in the analyses. If applicable, describe which groupings were chosen and why                                                         | 6                               |
| Statistical methods          | 12     | (a) Describe all statistical methods, including those used to control for confounding                                                                                                | 6                               |
|                              |        | (b) Describe any methods used to examine subgroups and interactions                                                                                                                  | 6                               |
|                              |        | (c) Explain how missing data were addressed                                                                                                                                          | 6                               |
|                              |        | (d) If applicable, explain how loss to follow-up was addressed                                                                                                                       | 6                               |
|                              |        | (e) Describe any sensitivity analyses                                                                                                                                                | 6                               |

|                          |     |                                                                                                                                                                                                              |                                            |
|--------------------------|-----|--------------------------------------------------------------------------------------------------------------------------------------------------------------------------------------------------------------|--------------------------------------------|
| <b>Results</b>           |     |                                                                                                                                                                                                              |                                            |
| Participants             | 13* | (a) Report numbers of individuals at each stage of study—eg numbers potentially eligible, examined for eligibility, confirmed eligible, included in the study, completing follow-up, and analysed            | 6, reference cited, also supplemental file |
|                          |     | (b) Give reasons for non-participation at each stage                                                                                                                                                         | supplemental file                          |
|                          |     | (c) Consider use of a flow diagram                                                                                                                                                                           | supplemental file                          |
| Descriptive data         | 14* | (a) Give characteristics of study participants (eg demographic, clinical, social) and information on exposures and potential confounders                                                                     | 8                                          |
|                          |     | (b) Indicate number of participants with missing data for each variable of interest                                                                                                                          | supplemental file                          |
|                          |     | (c) Summarise follow-up time (eg, average and total amount)                                                                                                                                                  | supplemental file                          |
| Outcome data             | 15* | Report numbers of outcome events or summary measures over time                                                                                                                                               | supplemental file                          |
| Main results             | 16  | (a) Give unadjusted estimates and, if applicable, confounder-adjusted estimates and their precision (eg, 95% confidence interval). Make clear which confounders were adjusted for and why they were included | 11                                         |
|                          |     | (b) Report category boundaries when continuous variables were categorized                                                                                                                                    | na                                         |
|                          |     | (c) If relevant, consider translating estimates of relative risk into absolute risk for a meaningful time period                                                                                             | na                                         |
| Other analyses           | 17  | Report other analyses done—eg analyses of subgroups and interactions, and sensitivity analyses                                                                                                               | 11 and supplemental file                   |
| <b>Discussion</b>        |     |                                                                                                                                                                                                              |                                            |
| Key results              | 18  | Summarise key results with reference to study objectives                                                                                                                                                     | 12                                         |
| <b>Limitations</b>       |     |                                                                                                                                                                                                              |                                            |
| Interpretation           | 20  | Give a cautious overall interpretation of results considering objectives, limitations, multiplicity of analyses, results from similar studies, and other relevant evidence                                   | 13-14                                      |
| Generalisability         | 21  | Discuss the generalisability (external validity) of the study results                                                                                                                                        | 13-14                                      |
| <b>Other information</b> |     |                                                                                                                                                                                                              |                                            |
| Funding                  | 22  | Give the source of funding and the role of the funders for the present study and, if applicable, for the original study on which the present article is based                                                | 16                                         |

\*Give information separately for cases and controls in case-control studies and, if applicable, for exposed and unexposed groups in cohort and cross-sectional studies.

1  
2 **Note:** An Explanation and Elaboration article discusses each checklist item and gives methodological background and published examples of transparent reporting. The STROBE  
3 checklist is best used in conjunction with this article (freely available on the Web sites of PLoS Medicine at <http://www.plosmedicine.org/>, Annals of Internal Medicine at  
4 <http://www.annals.org/>, and Epidemiology at <http://www.epidem.com/>). Information on the STROBE Initiative is available at [www.strobe-statement.org](http://www.strobe-statement.org).  
5  
6  
7  
8  
9  
10  
11  
12  
13  
14  
15  
16  
17  
18  
19  
20  
21  
22  
23  
24  
25  
26  
27  
28  
29  
30  
31  
32  
33  
34  
35  
36  
37  
38  
39  
40  
41  
42  
43  
44  
45  
46

For peer review only
