# Supplementary material for: Longitudinal cohort study of the impact of specialist cancer services for teenagers and young adults on quality of life: outcomes from the BRIGHTLIGHT study
Source: PubMed Central journal article supplement — BMJ Open. 2020 Nov 26;10(11):e038471. doi: 10.1136/bmjopen-2020-038471 (PMC7692812; doi:10.1136/bmjopen-2020-038471), 2020-11-26
Supplement: bmjopen-2020-038471supp001.pdf [file bmjopen-2020-038471supp001.pdf]

## Supplemental file

Figure A1: Matrix representing the causal diagram explaining confounding variable to enter in the Directed Acyclic Graph (DAG)

|           | TYA SCL | QOL | Age | Choice | CS | CT | DoH | Ethnicity | Finances | Gender | Geography | I&C | LTC | RtD | SE | SES | SS | Treatment |
|-----------|---------|-----|-----|--------|----|----|-----|-----------|----------|--------|-----------|-----|-----|-----|----|-----|----|-----------|
| TYA SCL   |         | ↗   | ↗   | ↗      | ↗  | ↗  | ↗   | ↗         | ↗        | O      | ↗         | ↗   | ↗   | ↗   | ↗  | ↗   | ↗  | ↗         |
| QOL       |         |     | ↗   | ↗      | ↗  | ↗  | ↗   | ↗         | ↗        | ↗      | ↗         | ↗   | ↗   | ↗   | ↗  | ↗   | ↗  | ↗         |
| Age       |         |     |     | ↗      | O  | ↗  | ↗   | O         | ↗        | O      | O         | ↗   | ↗   | ↗   | ↗  | ↗   | ↗  | ↗         |
| Choice    |         |     |     |        | ↗  | ↗  | O   | ↗         | ↗        | O      | ↗         | ↗   | ↗   | ↗   | ↗  | ↗   | ↗  | ↗         |
| CS        |         |     |     |        |    | ↗  | ↗   | ↗         | ↗        | O      | ↗         | ↗   | ↗   | ↗   | ↗  | ↗   | ↗  | ↗         |
| CT        |         |     |     |        |    |    | ↗   | ↗         | ↗        | ↗      | ↗         | ↗   | ↗   | ↗   | ↗  | ↗   | ↗  | ↗         |
| DoH       |         |     |     |        |    |    |     | ↗         | ↗        | ↗      | ↗         | ↗   | ↗   | ↗   | ↗  | ↗   | ↗  | ↗         |
| Ethnicity |         |     |     |        |    |    |     |           | ↗        | O      | ↗         | ↗   | ↗   | ↗   | ↗  | ↗   | ↗  | ↗         |
| Finances  |         |     |     |        |    |    |     |           |          | O      | ↗         | ↗   | ↗   | ↗   | O  | ↗   | ↗  | ↗         |
| Gender    |         |     |     |        |    |    |     |           |          |        |           | O   | ↗   | ↗   | ↗  | O   | ↗  | ↗         |
| Geography |         |     |     |        |    |    |     |           |          |        |           |     | ↗   | ↗   | ↗  | ↗   | ↗  | ↗         |
| I&C       |         |     |     |        |    |    |     |           |          |        |           |     |     | ↗   | ↗  | ↗   | ↗  | ↗         |
| LTC       |         |     |     |        |    |    |     |           |          |        |           |     |     |     | ↗  | ↗   | ↗  | ↗         |
| RtD       |         |     |     |        |    |    |     |           |          |        |           |     |     |     |    | ↗   | ↗  | ↗         |
| SE        |         |     |     |        |    |    |     |           |          |        |           |     |     |     |    |     | ↗  | ↗         |
| SES       |         |     |     |        |    |    |     |           |          |        |           |     |     |     |    |     |    | ↗         |
| SS        |         |     |     |        |    |    |     |           |          |        |           |     |     |     |    |     |    |           |
| Treatment |         |     |     |        |    |    |     |           |          |        |           |     |     |     |    |     |    |           |

CS: cancer severity; CT: cancer type; DoH: duration of hospitalisation; I&C: information & communication; LTC: long-term condition; QOL: quality of life; RtD: route to diagnosis; SE: symptom experience; SES: socioeconomic status; SS: social support

O – indicates a null relationship
