# Supplementary material for: Longitudinal cohort study of the impact of specialist cancer services for teenagers and young adults on quality of life: outcomes from the BRIGHTLIGHT study
Source: PubMed Central journal article supplement — BMJ Open. 2020 Nov 26;10(11):e038471. doi: 10.1136/bmjopen-2020-038471 (PMC7692812; doi:10.1136/bmjopen-2020-038471), 2020-11-26
Supplement: bmjopen-2020-038471supp003.pdf [file bmjopen-2020-038471supp003.pdf]

Table A2: Results from adjusted mixed effects models investigating the relationship between levels of TYA care received during the first 12 months from diagnosis and the quality of life – excluding bone cancer (N=667)

|                                  |              | <b>Difference in means</b> | <b>95% Confidence Interval</b> | <b>P-value</b> |
|----------------------------------|--------------|----------------------------|--------------------------------|----------------|
| TYA care category (v NO-TYA-PTC) | SOME-TYA-PTC | -6.02                      | -9.02 to -3.02                 | P=0.0003       |
|                                  | ALL-TYA-PTC  | -4.53                      | -7.72 to -1.35                 |                |

\* results from a three level model for repeated measurements of QOL over time since diagnosis, with a random effect for city and adjustment for time since diagnosis, age at diagnosis, type of cancer, socioeconomic status, severity of cancer, ethnicity, choice about where to receive treatment, long-term condition prior to cancer, days from 1<sup>st</sup> symptom to diagnosis, number of GP visits before diagnosis.
