# Supplementary material for: Longitudinal cohort study of the impact of specialist cancer services for teenagers and young adults on quality of life: outcomes from the BRIGHTLIGHT study
Source: PubMed Central journal article supplement — BMJ Open. 2020 Nov 26;10(11):e038471. doi: 10.1136/bmjopen-2020-038471 (PMC7692812; doi:10.1136/bmjopen-2020-038471), 2020-11-26
Supplement: bmjopen-2020-038471supp004.pdf [file bmjopen-2020-038471supp004.pdf]

Table A3: Subgroup investigation for lymphoma v other cancer: Results from adjusted\* mixed effects models with interaction terms (N=733)

|                   | <b>TYA care category</b>  | <b>Adjusted difference in means</b> | <b>95% confidence interval</b> | <b>P-value from interaction</b> |
|-------------------|---------------------------|-------------------------------------|--------------------------------|---------------------------------|
| Cancer type       |                           |                                     |                                |                                 |
| Lymphoma          | SOME-TYA-PTC v NO-TYA-PTC | -6.01                               | -9.58 to -2.44                 | 0.90                            |
|                   | ALL-TYA-PTC v NOTYA-PTC   | -4.13                               | -8.08 to -0.17                 |                                 |
| All other cancers | SOME-TYA-PTC v NO-TYA-PTC | -4.89                               | -9.63 to -0.16                 |                                 |
|                   | ALL-TYA-PTC v NOTYA-PTC   | -4.31                               | -9.18 to 0.55                  |                                 |

\* model with a random effect for city and adjustment for time since diagnosis, age at diagnosis, type of cancer, socioeconomic status, severity of cancer, ethnicity, choice about where to receive treatment, long-term condition prior to cancer, days from 1<sup>st</sup> symptom to diagnosis, number of GP visits before diagnosis.
