# Supplementary material for: Longitudinal cohort study of the impact of specialist cancer services for teenagers and young adults on quality of life: outcomes from the BRIGHTLIGHT study
Source: PubMed Central journal article supplement — BMJ Open. 2020 Nov 26;10(11):e038471. doi: 10.1136/bmjopen-2020-038471 (PMC7692812; doi:10.1136/bmjopen-2020-038471), 2020-11-26
Supplement: bmjopen-2020-038471supp005.pdf [file bmjopen-2020-038471supp005.pdf]

Table A4: Results from a joint model of longitudinal quality of life scores and survival investigating their relationship with level of TYA care received during the first 12 months from diagnosis (N=733)\*

|                                  |              | Difference in means | 95% Confidence Interval |
|----------------------------------|--------------|---------------------|-------------------------|
| TYA care category (v NO-TYA-PTC) | SOME-TYA-PTC | -6.45               | -9.34 to -3.56          |
|                                  | ALL-TYA-PTC  | -6.11               | -9.58 to -2.64          |

\* Models fitted using Stata command *stjm* with a Weibull submodel for survival (reference: M Crowther, K Abrams, P Lambert. Joint modelling of longitudinal and survival data. The Stata Journal (2013) **13**, Number 1, pp. 165–184) Adjustment for time since diagnosis, age at diagnosis, type of cancer, socioeconomic status, severity of cancer, ethnicity, choice about where to receive treatment, long-term condition prior to cancer, days from 1<sup>st</sup> symptom to diagnosis, number of GP visits before diagnosis and city (as a fixed effect as a three level model could not be fitted).
